# Supplementary material for: Palladium-catalyzed direct alkenylation of 4-hydroxy-2-pyridones
Source: Royal Society of Chemistry journal article supplement (doi:10.1039/c5ra26360c), 2016-01-01

# **Palladium-Catalyzed Direct Alkenylation of 4-hydroxy-2-pyridones.**

Tania Katsina, Elissavet E. Anagnostaki, Foteini Mitsa,  
Vasiliki Sarli and Alexandros L. Zografos\*

*Contribution from the Department of Chemistry, Laboratory of Organic Chemistry, Aristotle University of  
Thessaloniki, University Campus, Thessaloniki 54124, Greece  
Corresponding Author e-mail: [alzograf@chem.auth.gr](mailto:alzograf@chem.auth.gr)*

## **Supporting Information**

## Table of contents

|      |                                                              |         |
|------|--------------------------------------------------------------|---------|
| I.   | General Information                                          | S3      |
| II.  | Experimental procedures and physical properties of compounds | S3 – S8 |
| III. | NMR spectra of compounds                                     | S9- S41 |

## I. General Information

All reactions were carried out in dried glass reaction tube equipped with a magnetic stir bar under argon atmosphere with dry solvents under anhydrous conditions. Dry 1,4-dioxane was distilled from sodium (Na) and benzophenone, dry acetonitrile from  $P_2O_5$  whereas dry toluene, dry dimethylsulfoxide (DMSO) and dry dimethylformamide (DMF) were distilled from  $CaH_2$ . The solvents were kept under argon using molecular sieves  $4\text{\AA}$  in their bottles. Reagents were purchased at the highest commercial quality and used without further purification. Reactions were monitored by thin-layer chromatography (TLC) carried out on S-2 0.25 mm E. Merck silica gel plates (60F-254) using UV light as visualizing agent and seebach as developing agent. E. E. Merck silica gel (60, particle size 0.040–0.063 mm) was used for flash column chromatography. NMR spectra were recorded on Brüker 300 AM and Agilent 500 spectrometer using the indicated deuterated solvents and calibrated using residual peaks as an internal reference. The following abbreviations are used to designate multiplicities: s = singlet, d = doublet, t = triplet, q = quartet, quin = quintet, sex = sextet, oct = octet, m = multiplet, br = broad. All 4-hydroxy-2-pyridone spectra are presenting small amounts of rotamers which has been taken care to be reduced by the appropriate choice of deuterated solvents. High-resolution mass spectra (HRMS) were recorded on an Agilent ESI-TOF (time of flight) mass spectrometer at a 4000 V emitter voltage. Melting points were obtained by Stuart Melting Point Apparatus SMP3, Bibby Scientific.

## II Preparation of N-Substituted 4-Hydroxy-2-pyridones

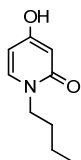

### N-Butyl-4-hydroxy-2-pyridone (3a)

A round bottom flask equipped with a condenser was charged with 4-benzyloxy-2-hydroxy-pyridine (0.250 g; 1.24 mmol) and 1-iodobutane (0.212 ml; 1.86 mmol) and dissolved in DMF (3 ml). Potassium carbonate (0.258 g; 1.86 mmol) was added in one portion and the mixture was heated to  $80^\circ\text{C}$  for 48 h. The resulting was evaporated to dryness under reduced pressure and chromatographed with silica gel (petroleum ether : EtOAc 2:1) to provide *N*-butyl-4-benzyloxy-2-pyridone (0.170 g; 53% yield).  $R_f = 0.66$  (EtOAc).  $^1\text{H}$  NMR (500 MHz,  $\text{CDCl}_3$ ):  $\delta = 7.37\text{--}7.32$  (m, 5H), 7.10 (d,  $J = 10\text{Hz}$ , 1H), 5.96 (d,  $J = 2.5\text{Hz}$ , 1H), 5.92 (dd,  $J = 10\text{Hz}$   $J = 2.5\text{Hz}$ , 1H), 4.95 (s, 2H), 3.84 (t,  $J = 7\text{Hz}$ , 2H), 1.67 (quin,  $J = 7\text{Hz}$ , 2H), 1.34 (sex,  $J = 7\text{Hz}$ , 2H), 0.92 (t,  $J = 7\text{Hz}$ , 3H);  $^{13}\text{C}$  NMR (125 MHz,  $\text{CDCl}_3$ ):  $\delta = 166.8, 163.9, 137.5, 135.3, 128.6, 128.4, 127.6, 100.6, 98.4, 70.0, 48.7, 31.4, 19.8, 13.7$ .

The resulting *N*-butyl-4-benzyloxy-2-pyridone (0.170 g) was added in a 25 mL sealed tube and was dissolved in 4 mL of methanol. After charging it with 0.017 g of 10% Pd/C, hydrogen gas was bubbled in

for 15 min before the tube is sealed and stirred at room temperature for **12 h**. Filtration through Celite and concentration gave *N*-butyl-4-hydroxy-2-pyridone (0.117 g, 90% yield) as a white solid which was used without further purification.  $R_f = 0.69$  ( $\text{CH}_2\text{Cl}_2 : \text{CH}_3\text{COCH}_3$ , 1 : 2).  $^1\text{H}$  NMR (500 MHz,  $\text{CD}_3\text{COCD}_3$ ):  $\delta = 7.44$  (d,  $J = 7\text{Hz}$ , 1H), 5.88 (d,  $J = 7\text{Hz}$ , 1H), 5.70 (s, 1H), 3.84 (t,  $J = 7.5\text{Hz}$ , 2H), 1.64 (q,  $J = 7\text{Hz}$ , 2H), 1.32 (six,  $J = 7\text{Hz}$ , 2H), 0.92 (t,  $J = 7\text{Hz}$ , 3H);  $^{13}\text{C}$  NMR (125 MHz,  $\text{CD}_3\text{COCD}_3$ ):  $\delta = 170.1$ , 163.7, 138.9, 106.5, 99.0, 50.5, 31.5, 19.7, 13.6.

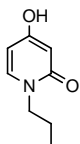

### ***N*-Propyl-4-hydroxy-2-pyridone (3b)**

A round bottom flask equipped with a condenser was charged with 4-benzyloxy-2-hydroxy-pyridine (0.200 g; 0.99 mmoles) and allylbromide (0.130 ml; 1.5 mmoles) and dissolved in DMF (2 ml). Potassium carbonate (0.206 g; 1.5 mmoles) was added in one portion and the mixture was heated to 80 °C for 12 h. The resulting was evaporated to dryness under reduced pressure and chromatographed with silica gel ( $\text{CH}_2\text{Cl}_2$  100%) to provide *N*-allyl-4-benzyloxy-2-pyridone (0.216 g; 90% yield).  $R_f = 0.68$  (Petroleum ether : EtOAc, 2 : 1).  $^1\text{H}$  NMR (500 MHz,  $\text{CDCl}_3$ ):  $\delta = 7.40$ -7.34 (m, 5H), 7.11 (d,  $J = 7.5\text{Hz}$ , 1H), 6.0 (d,  $J = 2.5\text{Hz}$ , 1H), 5.98 (dd,  $J = 7.5\text{Hz}$   $J = 2.5\text{Hz}$ , 1H), 5.96-5.89 (m, 1H), 5.24 (d,  $J = 10\text{Hz}$ , 1H), 5.17 (d,  $J = 17\text{Hz}$ , 1H), 5.00 (s, 2H), 4.51 (d,  $J = 5.5\text{ Hz}$ , 2H);  $^{13}\text{C}$  NMR (125 MHz,  $\text{CDCl}_3$ ):  $\delta = 167.0$ , 163.7, 136.9, 135.3, 132.8, 128.7, 128.4, 127.7, 118.1, 101.2, 98.4, 70.2, 50.1.

The resulting *N*-allyl-4-benzyloxy-2-pyridone (0.216 g) was added in a 25 mL sealed tube and was dissolved in 5 mL of methanol. After charging it with 0.021 g of 10% Pd/C, hydrogen gas was bubbled in for 15 min before the tube is sealed and stirred at room temperature for 12 h. Filtration through Celite and concentration gave *N*-propyl-4-hydroxy-2-pyridone (0.116 g, 85% yield) as a white solid which was used without further purification.  $R_f = 0.60$  ( $\text{CH}_2\text{Cl}_2 : \text{CH}_3\text{COCH}_3$ , 1 : 2).  $^1\text{H}$  NMR (500 MHz,  $\text{CD}_3\text{COCD}_3$ ):  $\delta = 7.46$  (d,  $J = 7\text{Hz}$ , 1H), 5.95 (d,  $J = 7\text{Hz}$ , 1H), 5.79 (br s, 1H), 3.83 (t,  $J = 6.5\text{Hz}$ , 2H), 1.69 (six,  $J = 6.5\text{Hz}$ , 2H), 0.89 (t,  $J = 7\text{Hz}$ , 3H);  $^{13}\text{C}$  NMR (125 MHz,  $\text{CD}_3\text{COCD}_3$ ):  $\delta = 167.2$ , 163.7, 138.9, 100.1, 98.7, 49.8, 22.5, 10.3.

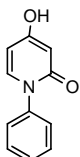

### ***N*-Phenyl-4-hydroxy-2-pyridone (3c)**

A mixture of 4-benzyloxy-2-pyridone (0.260 g; 1.3 mmoles), bromobenzene (0.179 ml, 1.7 mmol), CuI (0.762 g, 0.4 mmol), potassium carbonate (0.387 g, 2.8 mmol), in DMF (5 ml) was heated to 150 °C for 72

h. After being stirred for 72h, cold water (10mL) was added, and the white solid was filtered and washed with CH<sub>2</sub>Cl<sub>2</sub>. The mixture was extracted with brine (3 x 10 mL). The organic fraction was dried over MgSO<sub>4</sub> and the solvent was evaporated under reduced pressure. The residue was a white solid which was used without further purification to give compound *N*-phenyl-4-benzyloxy-2-pyridone (0.195 mg, 54% yield) . *R*<sub>f</sub> = 0.88 (CH<sub>2</sub>Cl<sub>2</sub> : CH<sub>3</sub>COCH<sub>3</sub>, 1 : 1). <sup>1</sup>H NMR (500 MHz, CD<sub>3</sub>COCD<sub>3</sub>): δ = 7.54-7.35 (m, 10H), 6.07 (dd, *J* = 8Hz *J* = 2.5Hz, 1H), 5.94 (d, *J* = 2.5Hz, 1H), 5.16 (s, 2H); <sup>13</sup>C NMR (125 MHz, CD<sub>3</sub>COCD<sub>3</sub>): δ = 167.2, 162.6, 141.2, 138.5, 136.2, 128.8, 128.5, 128.2, 127.8, 127.7, 126.8, 100.2, 98.0, 69.9.

The resulting *N*-phenyl-4-benzyloxy-2-pyridone (0.195 g) was added in a 25 ml sealed tube and was dissolved in 5 mL of methanol. After charging it with 0.019 g of 10% Pd/C, hydrogen gas was bubbled in for 15 min before the tube is sealed and stirred at room temperature for 12 h. Filtration through Celite and concentration gave *N*-phenyl-4-hydroxy-2-pyridone (0.209 g, 92% yield) as a white solid which was used without further purification. *R*<sub>f</sub> = 0.53 (CH<sub>2</sub>Cl<sub>2</sub> : CH<sub>3</sub>COCH<sub>3</sub>, 1 : 1). <sup>1</sup>H NMR (500 MHz, DMSO-*d*<sub>6</sub>): δ = 10.80 (brs, 1H), 7.52-7.27 (m, 6H), 5.94 (dd, *J* = 7.5Hz, *J* = 2.5Hz, 1H), 5.63 (d, *J* = 2.5Hz, 1H); <sup>13</sup>C NMR (125 MHz, DMSO-*d*<sub>6</sub>): δ = 167.4, 163.0, 141.2, 139.8, 129.3, 128.1, 127.3, 100.8, 99.0.

### III General Experimental Procedure for the 3-Alkenylation of 4-Hydroxy-2-pyridones (3-3c)

A dried screw glass vial equipped with a magnetic stirring bar was charged with the *N*-substituted-4-hydroxy-2-pyridinone (**3-3c**) (0.24 to 0.16 mmoles), Cu(OAc)<sub>2</sub> (1 equiv), dry acetonitrile (3 ml), the desired alkene (3 equiv), and formic acid (2 equiv) successively, followed by Pd(OAc)<sub>2</sub> (5 mol%). The vial is tightly closed with its screw cap. The reaction is immediately emerged at 40 °C oil bath and is vigorously stirred for the indicated time. Then, the reaction mixture is quenched by the addition of 4 ml of saturated sodium bicarbonate solution, stirred for 5 min and the reaction mixture is extracted with EtOAc (4 X 5 ml). The combined organic extracts are dried over anhydrous sodium sulfate, filtered and concentrated *in vacuo*. Purification by silica gel flash column chromatography is followed to give the desired alkylated compounds.

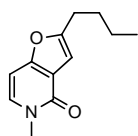

#### 2-Butyl-5-methyl-furo[3,2-*c*]pyridin-4-(5*H*)-one (**5**)

Following the general procedure described above *N*-methyl-4-hydroxypyridone-2 (**3**)<sup>1</sup> (30 mg, 0.24 mmoles) was reacted with 1-hexene (42 μL, 0.72 mmoles) for 3h to give 39 mg, 80% yield of **5** as a white solid, m.p. 199-204 °C, after chromatographic purification (CH<sub>2</sub>Cl<sub>2</sub> : (C<sub>2</sub>H<sub>5</sub>)<sub>2</sub>O 25:1) ; *R*<sub>f</sub> = 0.39 (CH<sub>2</sub>Cl<sub>2</sub> : (C<sub>2</sub>H<sub>5</sub>)<sub>2</sub>O, 1 : 1). <sup>1</sup>H NMR (500 MHz, CDCl<sub>3</sub>): δ = 7.09 (d, *J* = 7.5Hz, 1H), 6.56 (s, 1H), 6.44 (d, *J* = 7.5Hz, 1H),

3.60 (s, 3H), 2.72 (t,  $J = 7.3\text{Hz}$ , 2H), 1.69 (quin,  $J = 7.3\text{Hz}$ , 2H), 1.40 (six,  $J = 7.3\text{Hz}$ , 2H), 0.94 (t,  $J = 7.3\text{Hz}$ , 3H);  $^{13}\text{C}$  NMR (125 MHz,  $\text{CDCl}_3$ ):  $\delta = 159.6, 158.6, 158.4, 133.3, 117.3, 102.2, 95.8, 37.0, 29.7, 27.8, 22.1, 13.7$ ; HRMS: calcd for  $\text{C}_{12}\text{H}_{16}\text{NO}_2^+$   $[\text{M} + \text{H}^+]$ : 206.1181, found 206.1179.

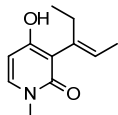

### ***N*-Methyl-4-hydroxy-3-(pent-2-en-3-yl)pyridin-2(1*H*)-one (17)**

Following the general procedure described above *N*-methyl-4-hydroxypyridone-2 (**3**)<sup>1</sup> (30 mg, 0.24 mmol) was reacted with 2-pentene (77.7  $\mu\text{L}$ , 0.72 mmol) for 4.5 h to give 26 mg, 57% yield of **17** as a yellow viscous oil after chromatographic purification ( $\text{CH}_2\text{Cl}_2 : (\text{C}_2\text{H}_5)_2\text{O}$  25:1);  $R_f = 0.36$  ( $\text{CH}_2\text{Cl}_2 : (\text{C}_2\text{H}_5)_2\text{O}$ , 1 : 1).  $^1\text{H}$  NMR (500 MHz,  $\text{CD}_3\text{COCD}_3$ ):  $\delta = 7.41$  (d,  $J = 7.6\text{Hz}$ , 1H), 5.95 (d,  $J = 7.6\text{Hz}$ , 1H), 5.57 (q,  $J = 6.0\text{Hz}$ , 1H), 3.40 (s, 3H), 2.37 (m, 1H), 2.25 (m, 1H), 1.44 (d,  $J = 6.7\text{Hz}$ , 3H), 0.91 (t,  $J = 7.3\text{Hz}$ , 3H);  $^{13}\text{C}$  NMR (125 MHz, Acetone- $d_6$ ):  $\delta = 161.8, 160.9, 137.6, 135.3, 122.8, 110.1, 98.3, 35.8, 28.5, 13.9, 11.9$ ; HRMS: calcd for  $\text{C}_{11}\text{H}_{16}\text{NO}_2^+$   $[\text{M} + \text{H}^+]$ : 194.1181, found 194.1183; Anal. calcd for  $\text{C}_{11}\text{H}_{15}\text{NO}_2$ : C, 68.37; H, 7.82; N, 7.25%. Found: C, 68.43; H, 7.85; N, 7.20%.

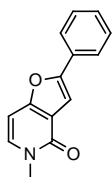

### **2-Phenyl-5-methyl-furo[3,2-*c*]pyridin-4-(5*H*)-one (18)**

Following the general procedure described above *N*-methyl-4-hydroxypyridone-2 (**3**)<sup>1</sup> (30 mg, 0.24 mmol) was reacted with styrene (82.3  $\mu\text{L}$ , 0.72 mmol) for 3 h to give 47 mg, 87% yield of **18** as a yellow solid, m.p. 166–168°C, after chromatographic purification ( $\text{CH}_2\text{Cl}_2 : (\text{C}_2\text{H}_5)_2\text{O}$  8:1);  $R_f = 0.52$  ( $\text{CH}_2\text{Cl}_2 : (\text{C}_2\text{H}_5)_2\text{O}$ , 1 : 1).  $^1\text{H}$  NMR (500 MHz,  $\text{CDCl}_3$ ):  $\delta = 7.77$  (d,  $J = 7.2\text{Hz}$ , 2H), 7.46–7.31 (m, 3H), 7.21 (s, 1H), 7.20 (d,  $J = 7.0\text{Hz}$ , 1H), 6.57 (d,  $J = 7.0\text{Hz}$ , 1H), 3.6 (s, 3H);  $^{13}\text{C}$  NMR (125 MHz,  $\text{CDCl}_3$ ):  $\delta = 159.6, 159.0, 154.9, 134.3, 129.7, 128.8, 128.4, 124.4, 118.2, 101.8, 95.6, 37.0$ ; HRMS: calcd for  $\text{C}_{14}\text{H}_{12}\text{NO}_2^+$   $[\text{M} + \text{H}^+]$ : 226.0868, found 226.0863; Anal. calcd for  $\text{C}_{14}\text{H}_{11}\text{NO}_2$ : C, 74.65; H, 4.92; N, 6.22%. Found: C, 74.72; H, 4.97; N, 6.16%.

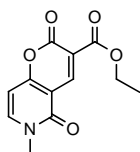

### **Ethyl 6-methyl-2,5-dioxo-5,6-dihydro-2*H*-pyrano[3,2-*c*]pyridine-3-carboxylate (19)<sup>3</sup>**

Following the general procedure described above N-methyl-4-hydroxypyridone-2 (**3**)<sup>1</sup> (30 mg, 0.24 mmoles) was reacted with diethyl-2-methylene malonate<sup>2</sup> (124 mg, 0.72 mmoles) for 2h to give 53 mg, 89% yield of **27** as a yellow solid; Mp 152-155 °C; <sup>1</sup>H NMR and <sup>13</sup>C NMR are identical to the reported.<sup>3</sup>

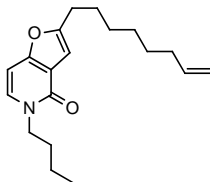

### 2-(1-octene)-5-butyl-furo[3,2-c]pyridin-4-(5H)-one (**20**)

Following the general procedure described above N-butyl-4-hydroxypyridone-2 (**3a**) (30 mg, 0.18 mmoles) was reacted with 1,9-decadiene (99.5  $\mu$ L, 0.54 mmoles) for 3h to give 49 mg, 68% yield of **19** as a yellow oil after chromatographic purification (CH<sub>2</sub>Cl<sub>2</sub> : (C<sub>2</sub>H<sub>5</sub>)<sub>2</sub>O 45:1); R<sub>f</sub> = 0.68 (CH<sub>2</sub>Cl<sub>2</sub> : (C<sub>2</sub>H<sub>5</sub>)<sub>2</sub>O, 1 : 1). <sup>1</sup>H NMR (500 MHz, CD<sub>3</sub>COCD<sub>3</sub>):  $\delta$  = 7.45 (d, *J* = 7.5Hz, 1H), 6.52 (d, *J* = 7.5Hz, 1H), 6.51 (s, 1H), 5.81 (m, 1H), 4.99 (d, *J* = 17.5Hz, 1H), 4.91 (d, *J* = 9.9Hz, 1H), 4.00 (t, *J* = 6.5Hz, 2H), 2.74 (t, *J* = 7.2Hz, 2H), 1.75-1.65 (m, 4H), 1.46-1.31 (m, 10H), 0.93 (t, *J* = 7.6Hz, 3H); <sup>13</sup>C NMR (125 MHz, CD<sub>3</sub>COCD<sub>3</sub>):  $\delta$  = 158.5, 158.1, 157.7, 138.8, 133.9, 116.8, 113.8, 102.1, 94.3, 48.0, 33.5, 31.7, 31.6, 28.3, 27.6, 27.5, 22.4, 19.5, 13.1; HRMS: calcd for C<sub>19</sub>H<sub>28</sub>NO<sub>2</sub><sup>+</sup> [M + H<sup>+</sup>]: 302.2120, found 302.2121.

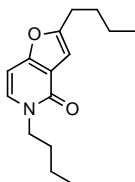

### 2-Butyl-5-butyl-furo[3,2-c]pyridin-4-(5H)-one (**21**)

Following the general procedure described above N-butyl-4-hydroxypyridone-2 (**3a**) (30 mg, 0.18 mmoles) was reacted with 1-hexene (30.6  $\mu$ L, 0.54 mmoles) for 3h to give 27.6 mg, 62% yield of **23** as a brown oil after chromatographic purification (CH<sub>2</sub>Cl<sub>2</sub> : (C<sub>2</sub>H<sub>5</sub>)<sub>2</sub>O 45:1); R<sub>f</sub> = 0.62 (CH<sub>2</sub>Cl<sub>2</sub> : (C<sub>2</sub>H<sub>5</sub>)<sub>2</sub>O, 1 : 1). <sup>1</sup>H NMR (500 MHz, CDCl<sub>3</sub>): 7.12 (d, *J* = 7.5Hz, 1H), 6.66 (s, 1H), 6.51 (d, *J* = 7.5Hz, 1H), 4.02 (t, *J* = 7.1Hz, 2H), 2.72 (t, *J* = 6.9Hz, 2H), 1.79-1.63 (m, 4H), 1.45-1.31 (m, 4H), 0.98-0.90 (m, 6H); <sup>13</sup>C NMR (125 MHz, CD<sub>3</sub>COCD<sub>3</sub>):  $\delta$  = 163.6, 163.4, 163.0, 139.1, 121.9, 107.3, 99.5, 53.2, 36.8, 34.9, 32.5, 27.1, 24.7, 18.3, 18.2; HRMS: calcd for C<sub>15</sub>H<sub>22</sub>NO<sub>2</sub><sup>+</sup> [M + H<sup>+</sup>]: 248.1650, found 248.1645; Anal. calcd for C<sub>15</sub>H<sub>21</sub>NO<sub>2</sub>: C, 72.84; H, 8.56; N, 5.66%. Found: C, 72.80; H, 8.55; N, 5.60%.

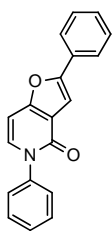

### 2-Phenyl-5-phenyl-furo[3,2-c]pyridin-4-(5H)-one (**22**)

Following the general procedure described above *N*-phenyl-4-hydroxypyridone-2 (**3c**) (30 mg, 0.16 mmoles) was reacted with styrene (55  $\mu$ L, 0.48 mmoles) for 4.5h to give 43 mg, 74% yield of **22** as a yellow viscous oil after chromatographic purification ( $\text{CH}_2\text{Cl}_2 : (\text{C}_2\text{H}_5)_2\text{O}$  45:1);  $R_f = 0.69$  ( $\text{CH}_2\text{Cl}_2 : (\text{C}_2\text{H}_5)_2\text{O}$ , 1 : 1).  $^1\text{H}$  NMR (500 MHz,  $\text{CDCl}_3$ ):  $\delta = 7.79$  (d,  $J = 7.8\text{Hz}$ , 2H), 7.56-7.32 (m, 9H), 7.29 (d,  $J = 7.5\text{Hz}$ , 1H), 6.67 (d,  $J = 7.5\text{Hz}$ , 1H);  $^{13}\text{C}$  NMR (125 MHz,  $\text{CD}_3\text{COCD}_3$ ):  $\delta = 159.1, 159.0, 155.3, 141.0, 134.5, 129.7, 129.3, 128.9, 128.5, 128.4, 127.0, 124.4, 118.5, 102.2, 96.0$ ; HRMS: calcd for  $\text{C}_{19}\text{H}_{14}\text{NO}_2^+$  [ $\text{M} + \text{H}^+$ ]: 288.1024, found 288.1019.

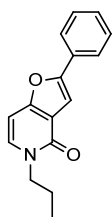

### 2-Phenyl-5-propyl-furo[3,2-c]pyridin-4-(5H)-one (**23**)

Following the general procedure described above *N*-propyl-4-hydroxypyridone-2 (**3b**) (20 mg, 0.13 mmoles) was reacted with styrene (44.7  $\mu$ L, 0.39 mmoles) for 3h to give 29 mg, 89% yield of **20** as a viscous oil after chromatographic purification ( $\text{CH}_2\text{Cl}_2 : (\text{C}_2\text{H}_5)_2\text{O}$  45:1);  $R_f = 0.70$  ( $\text{CH}_2\text{Cl}_2 : (\text{C}_2\text{H}_5)_2\text{O}$ , 1 : 1).  $^1\text{H}$  NMR (500 MHz,  $\text{CDCl}_3$ ):  $\delta = 7.85$ -7.33 (m, 5H), 7.24 (s, 1H), 7.20 (d,  $J = 7.1\text{Hz}$ , 1H), 6.59 (d,  $J = 7.1\text{Hz}$ , 1H), 4.04 (t,  $J = 7.5\text{Hz}$ , 2H), 1.85 (six,  $J = 7.5\text{Hz}$ , 2H), 1.02 (t,  $J = 7.5\text{Hz}$ , 3H);  $^{13}\text{C}$  NMR (125 MHz,  $\text{CDCl}_3$ ):  $\delta = 159.1, 158.7, 154.8, 133.6, 129.7, 128.7, 128.2, 124.3, 118.2, 101.9, 95.2, 50.6, 22.7, 10.9$ ; HRMS: calcd for  $\text{C}_{16}\text{H}_{16}\text{NO}_2^+$  [ $\text{M} + \text{H}^+$ ]: 254.1181, found 254.1175; Anal. calcd for  $\text{C}_{16}\text{H}_{15}\text{NO}_2$ : C, 75.87; H, 5.97; N, 5.53%. Found: C, 75.91; H, 5.94; N, 5.56%.

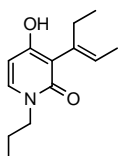

### *N*-propyl-4-hydroxy-3-(pent-2-en-3-yl)pyridin-2(1H)-one (**24**)

Following the general procedure described above *N*-propyl-4-hydroxypyridone-2 (**3b**) (30 mg, 0.196 mmoles) was reacted with 2-pentene (63.5  $\mu$ L, 0.588 mmoles) for 6h to give 26.5 mg, 61% yield of **24** as a



yellow oil after chromatographic purification ( $\text{CH}_2\text{Cl}_2 : (\text{C}_2\text{H}_5)_2\text{O}$  40:1);  $R_f = 0.45$  ( $\text{CH}_2\text{Cl}_2 : (\text{C}_2\text{H}_5)_2\text{O}$ , 1 : 1).  $^1\text{H}$  NMR (500 MHz,  $\text{CDCl}_3$ ):  $\delta = 7.18$  (d,  $J = 7.5\text{Hz}$ , 1H), 6.08 (d,  $J = 7.5\text{Hz}$ , 1H), 5.89 (q,  $J = 6.7\text{Hz}$ , 1H), 3.90 (m, 2H), 2.43 (m, 2H), 1.78 (six,  $J = 7.2\text{Hz}$ , 2H), 1.57 (d,  $J = 6.4\text{Hz}$ , 3H), 0.99 (m, 6H);  $^{13}\text{C}$  NMR (125 MHz,  $\text{CDCl}_3$ ):  $\delta = 161.4, 159.9, 136.7, 135.4, 125.7, 110.7, 98.4, 50.9, 28.5, 22.7, 14.6, 12.9, 11.1$ ; HRMS: calcd for  $\text{C}_{13}\text{H}_{20}\text{NO}_2^+$  [ $M + H^+$ ]: 222.1494, found 222.1495.

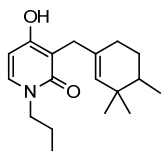

#### 4-Hydroxy-1-propyl-3-((3,3,4-trimethylcyclohex-1-ene-1-yl)methyl)pyridin-2(1H)-one (**25**)

Following the general procedure described above N-propyl-4-hydroxypyridone-2 (**3b**) (10 mg, 0.065 mmoles) was reacted with  $\beta$ -pinene (30.7  $\mu\text{L}$ , 0.195 mmoles) for 3h to give 13.9 mg, 74% yield of **25** as a white solid, m.p. 117-125  $^\circ\text{C}$ , after chromatographic purification ( $\text{CH}_2\text{Cl}_2 : (\text{C}_2\text{H}_5)_2\text{O}$  40:1);  $R_f = 0.48$  ( $\text{CH}_2\text{Cl}_2 : (\text{C}_2\text{H}_5)_2\text{O}$ , 1 : 1).  $^1\text{H}$  NMR (500 MHz,  $\text{CD}_3\text{COCD}_3$ ):  $\delta = 7.44$  (d,  $J = 8\text{Hz}$ , 1H), 7.37 (d,  $J = 8\text{Hz}$ , 2H), 7.15 (d,  $J = 8\text{Hz}$ , 2H), 6.06 (d,  $J = 8\text{Hz}$ , 1H), 3.90 (t,  $J = 7\text{Hz}$ , 2H), 2.61 (t,  $J = 7\text{Hz}$ , 2H), 1.68 (quin,  $J = 7\text{Hz}$ , 2H), 1.61 (quin,  $J = 7\text{Hz}$ , 2H), 1.36 (oct,  $J = 7\text{Hz}$ , 4H), 0.94 (dt,  $J = 7\text{Hz}, J = 2\text{Hz}$ , 6H);  $^{13}\text{C}$  NMR (125 MHz,  $\text{CD}_3\text{COCD}_3$ ):  $\delta = 162.1, 161.2, 140.6, 137.0, 131.3, 130.9, 127.3, 111.9, 99.1, 48.5, 35.1, 33.6, 31.4, 22.1, 19.6, 13.3, 13.1$ ; HRMS: calcd for  $\text{C}_{18}\text{H}_{28}\text{NO}_2^+$  [ $M + H^+$ ]: 290.2120, found 290.2115

## REFERENCES

1. P. S. Charifson, A.-L. Grillot, T. H. Grossman, J. D. Parsons, M. Badia, S. Bellon, D. D. Dainiger, J. E. Drumm, C. H. Gross, A. LeTiran, Y. Liao, N. Mani, D. P. Nicolau, E. Perola, et al. *J. Med. Chem* **2008**, *51*, 5243.
2. M. Matziari, M. Nasopoulou, A. Yiotakis, *Org. Lett.* **2006**, *8*, 2317.
3. S. Strah, J. Svete, B. Stanovnik, *Journal of Heterocyclic Chemistry* **1996**, *33*, 751.

## NMR Spectra of compounds

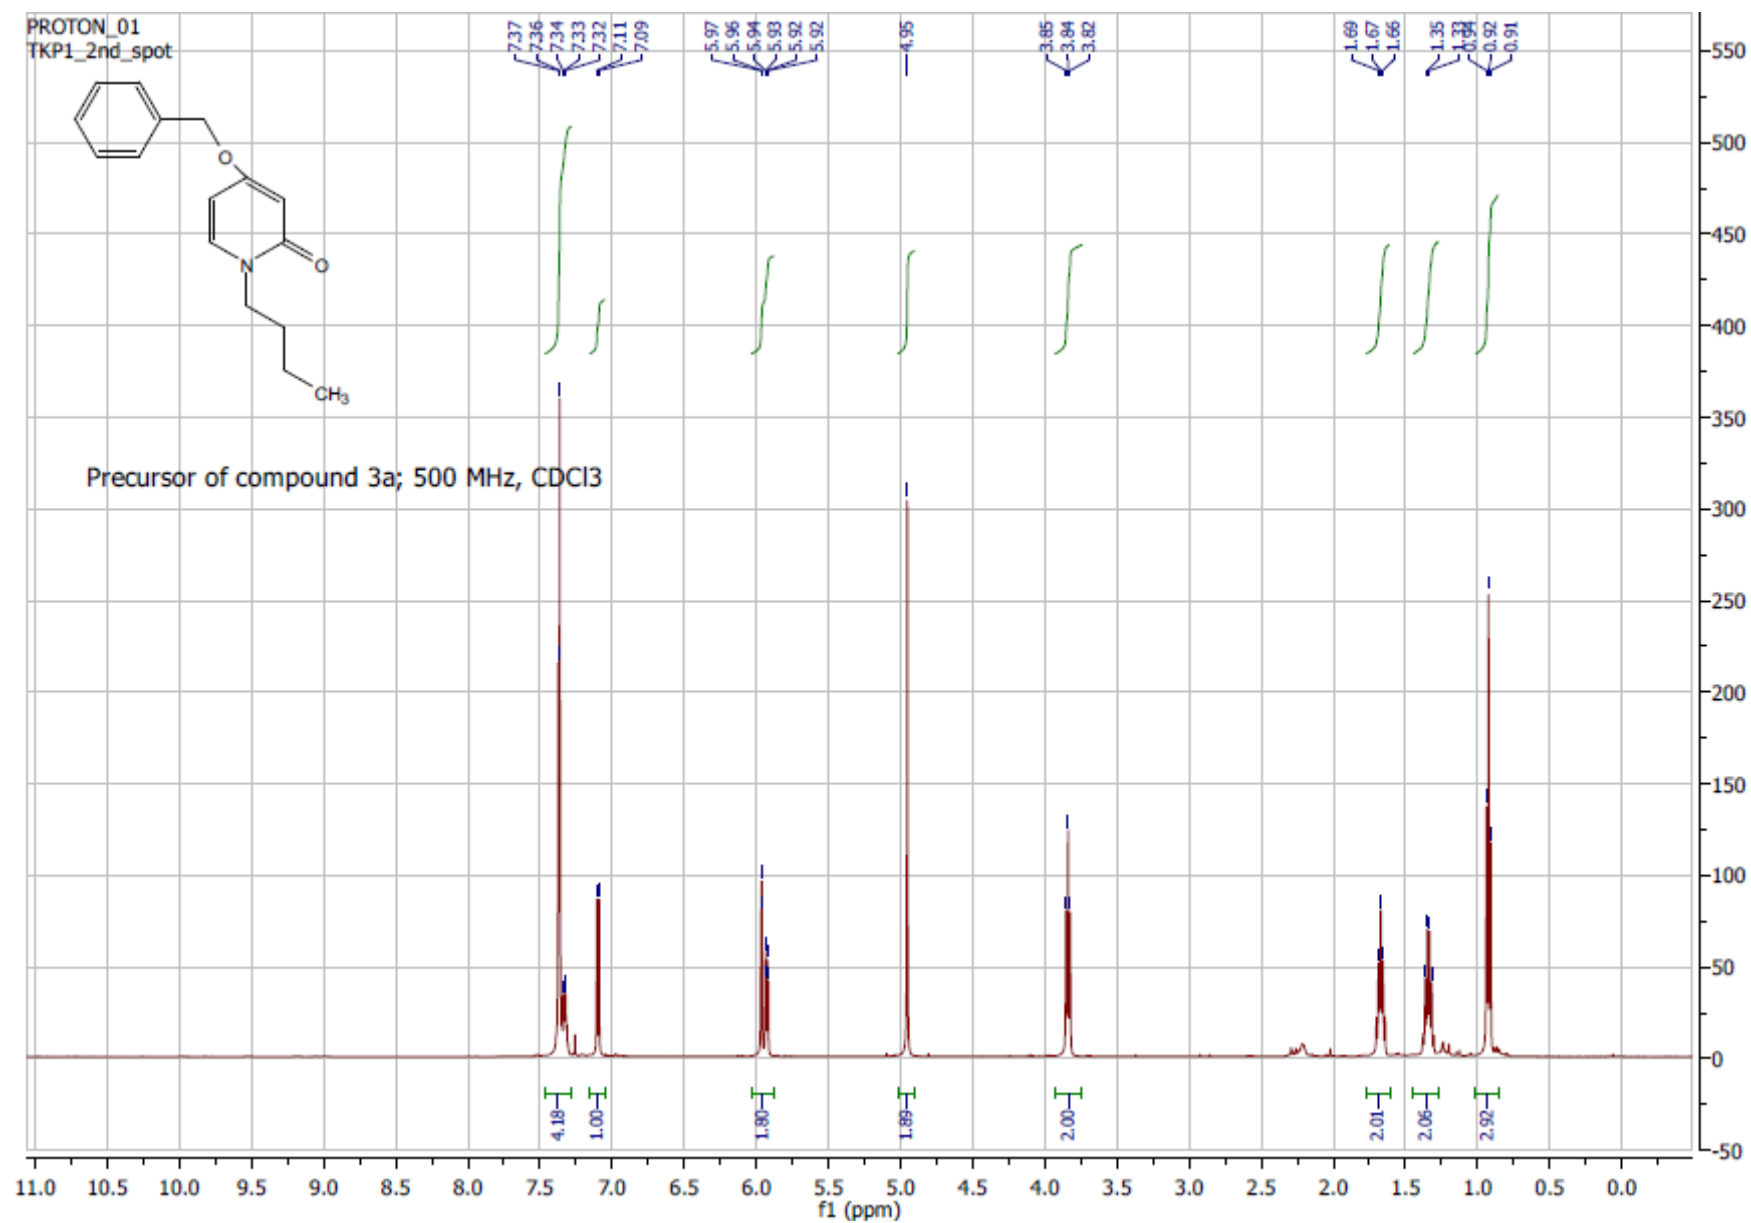

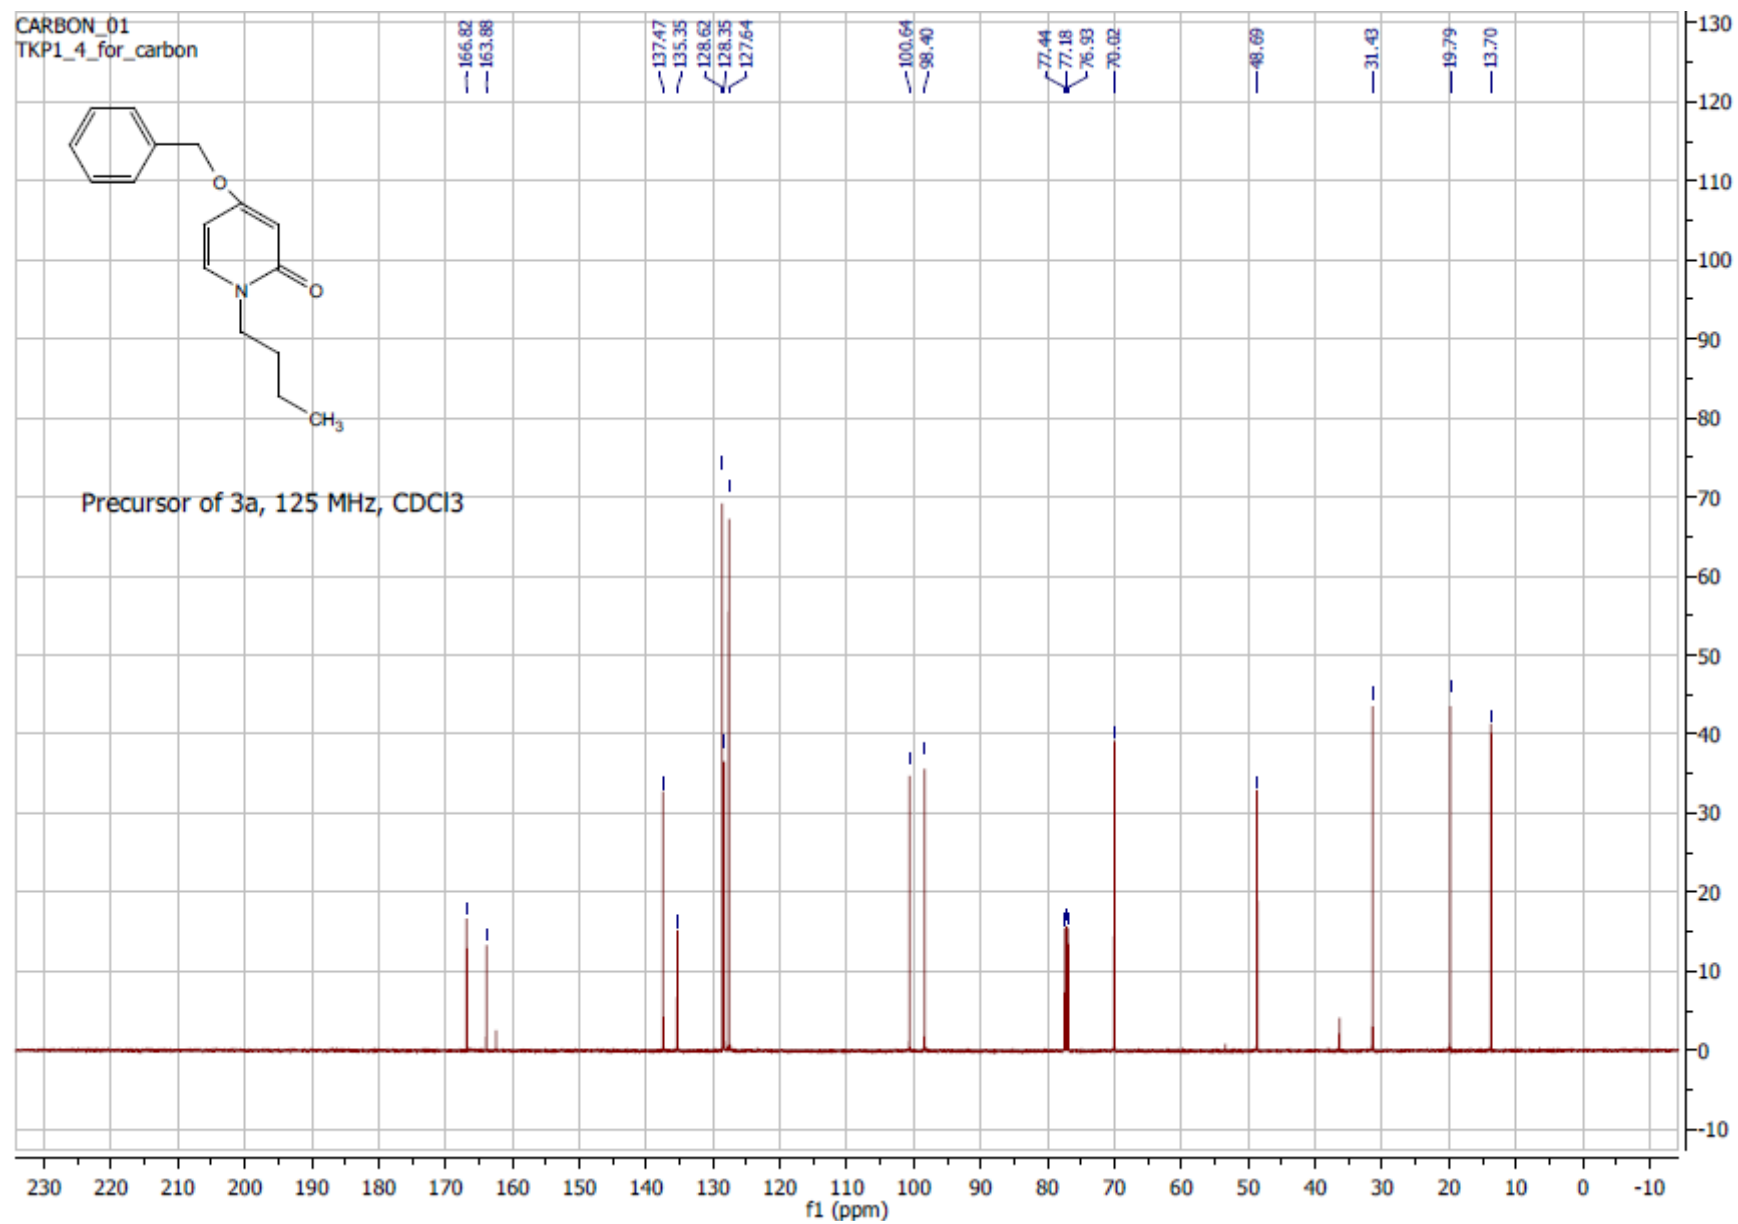

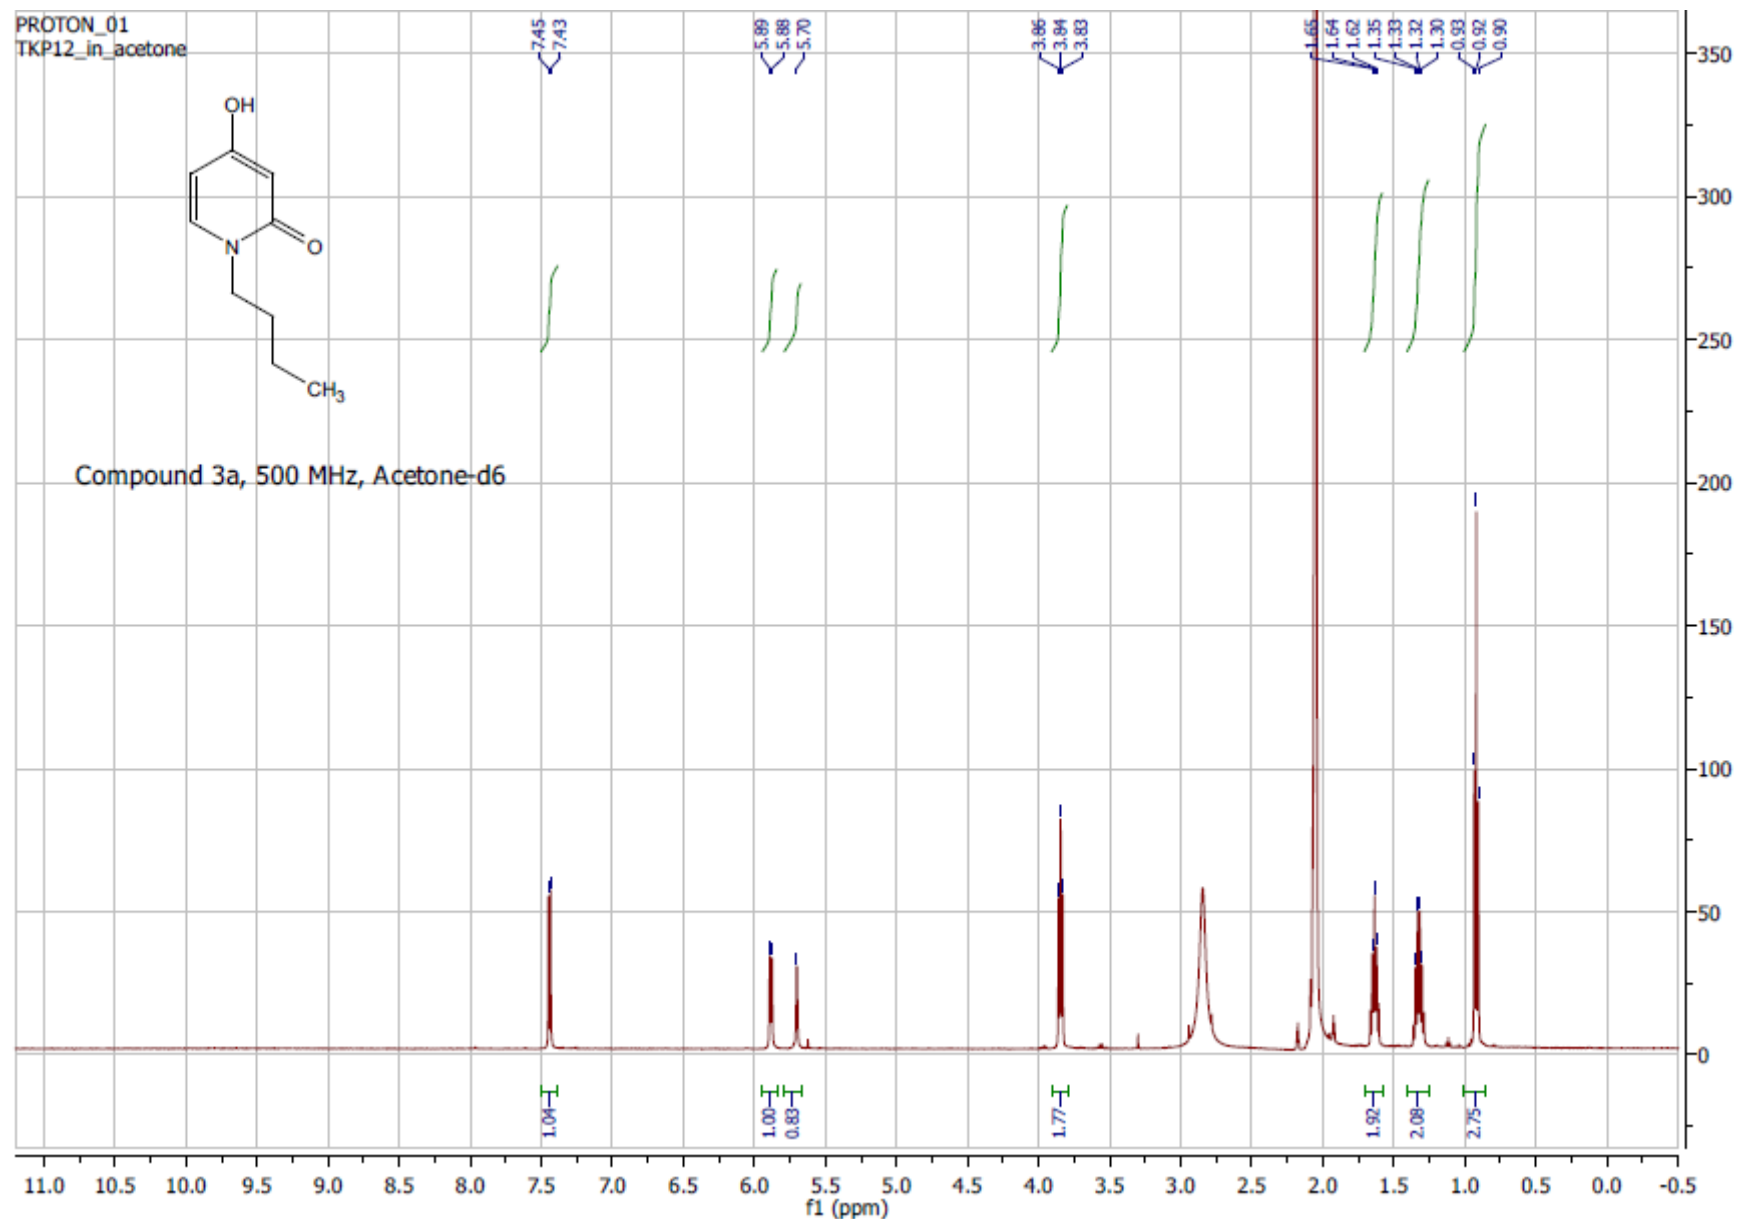

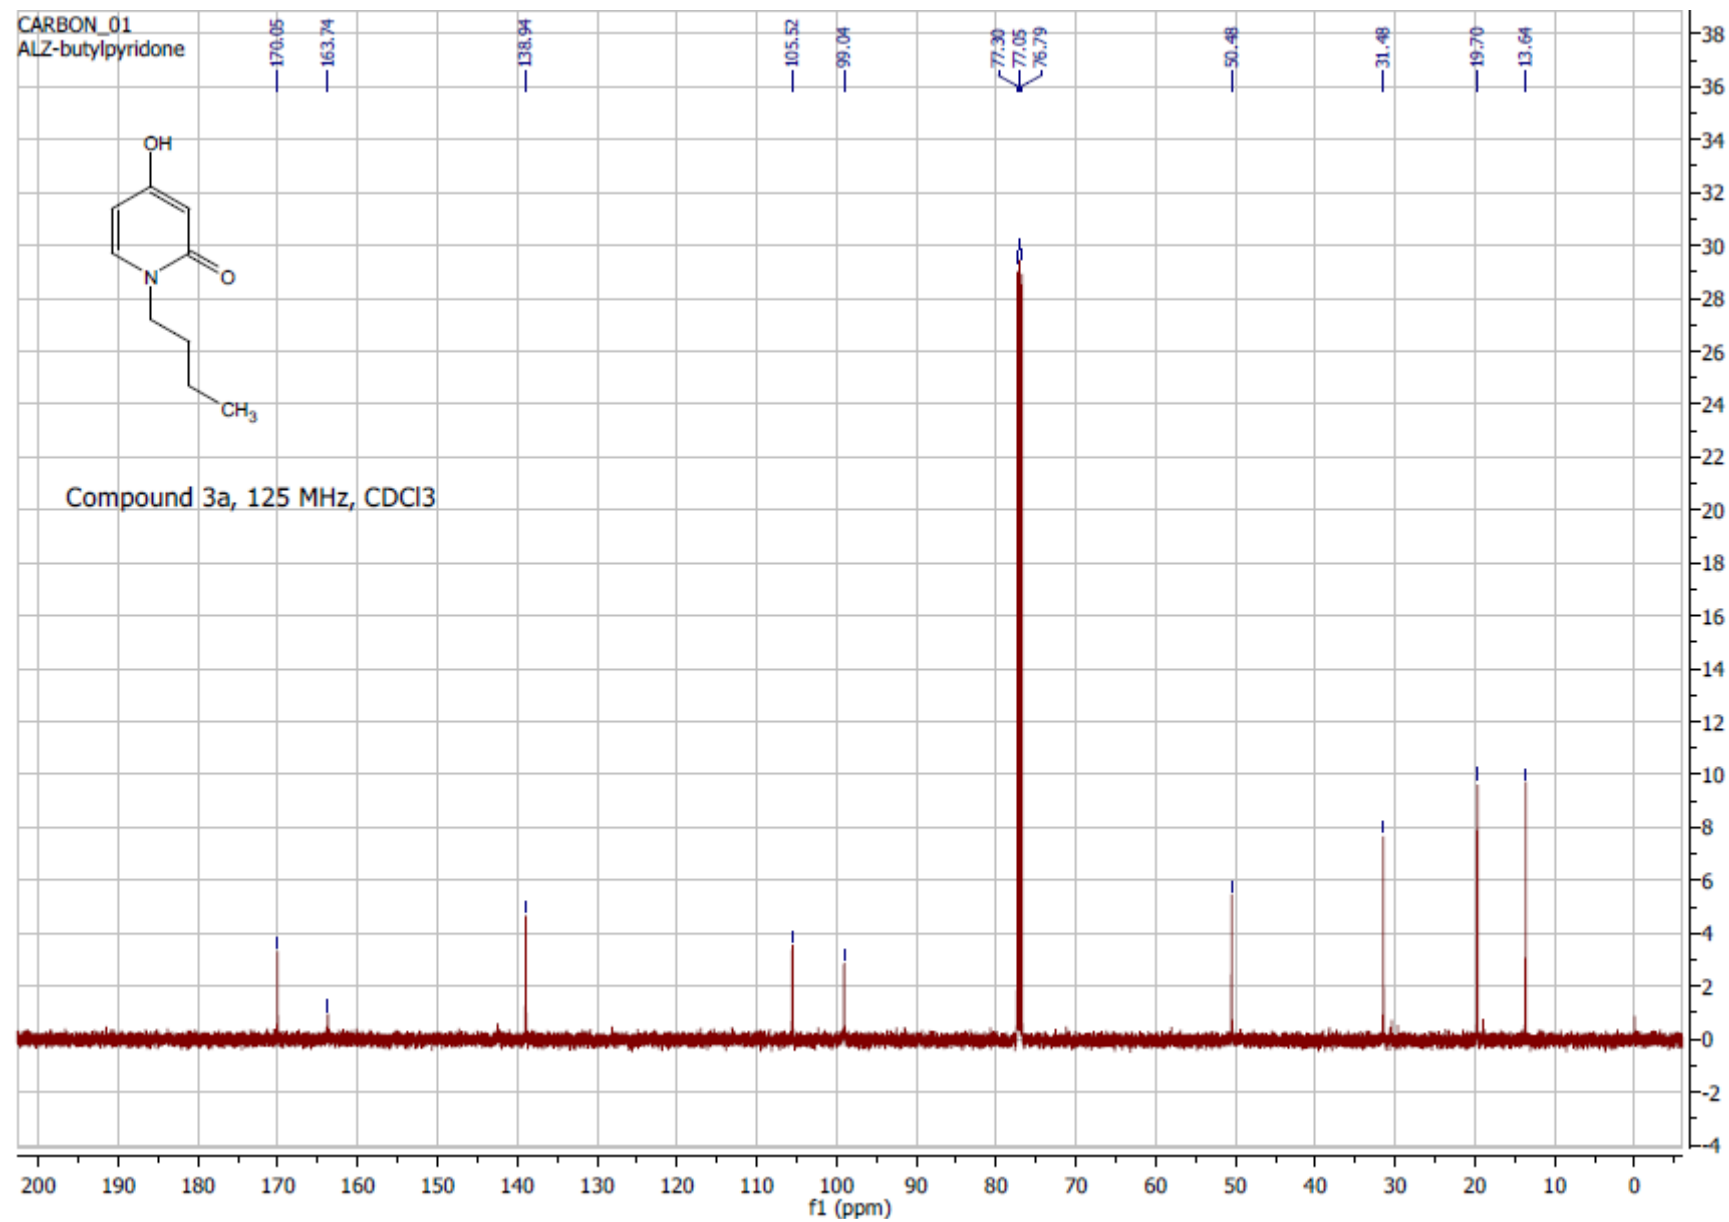

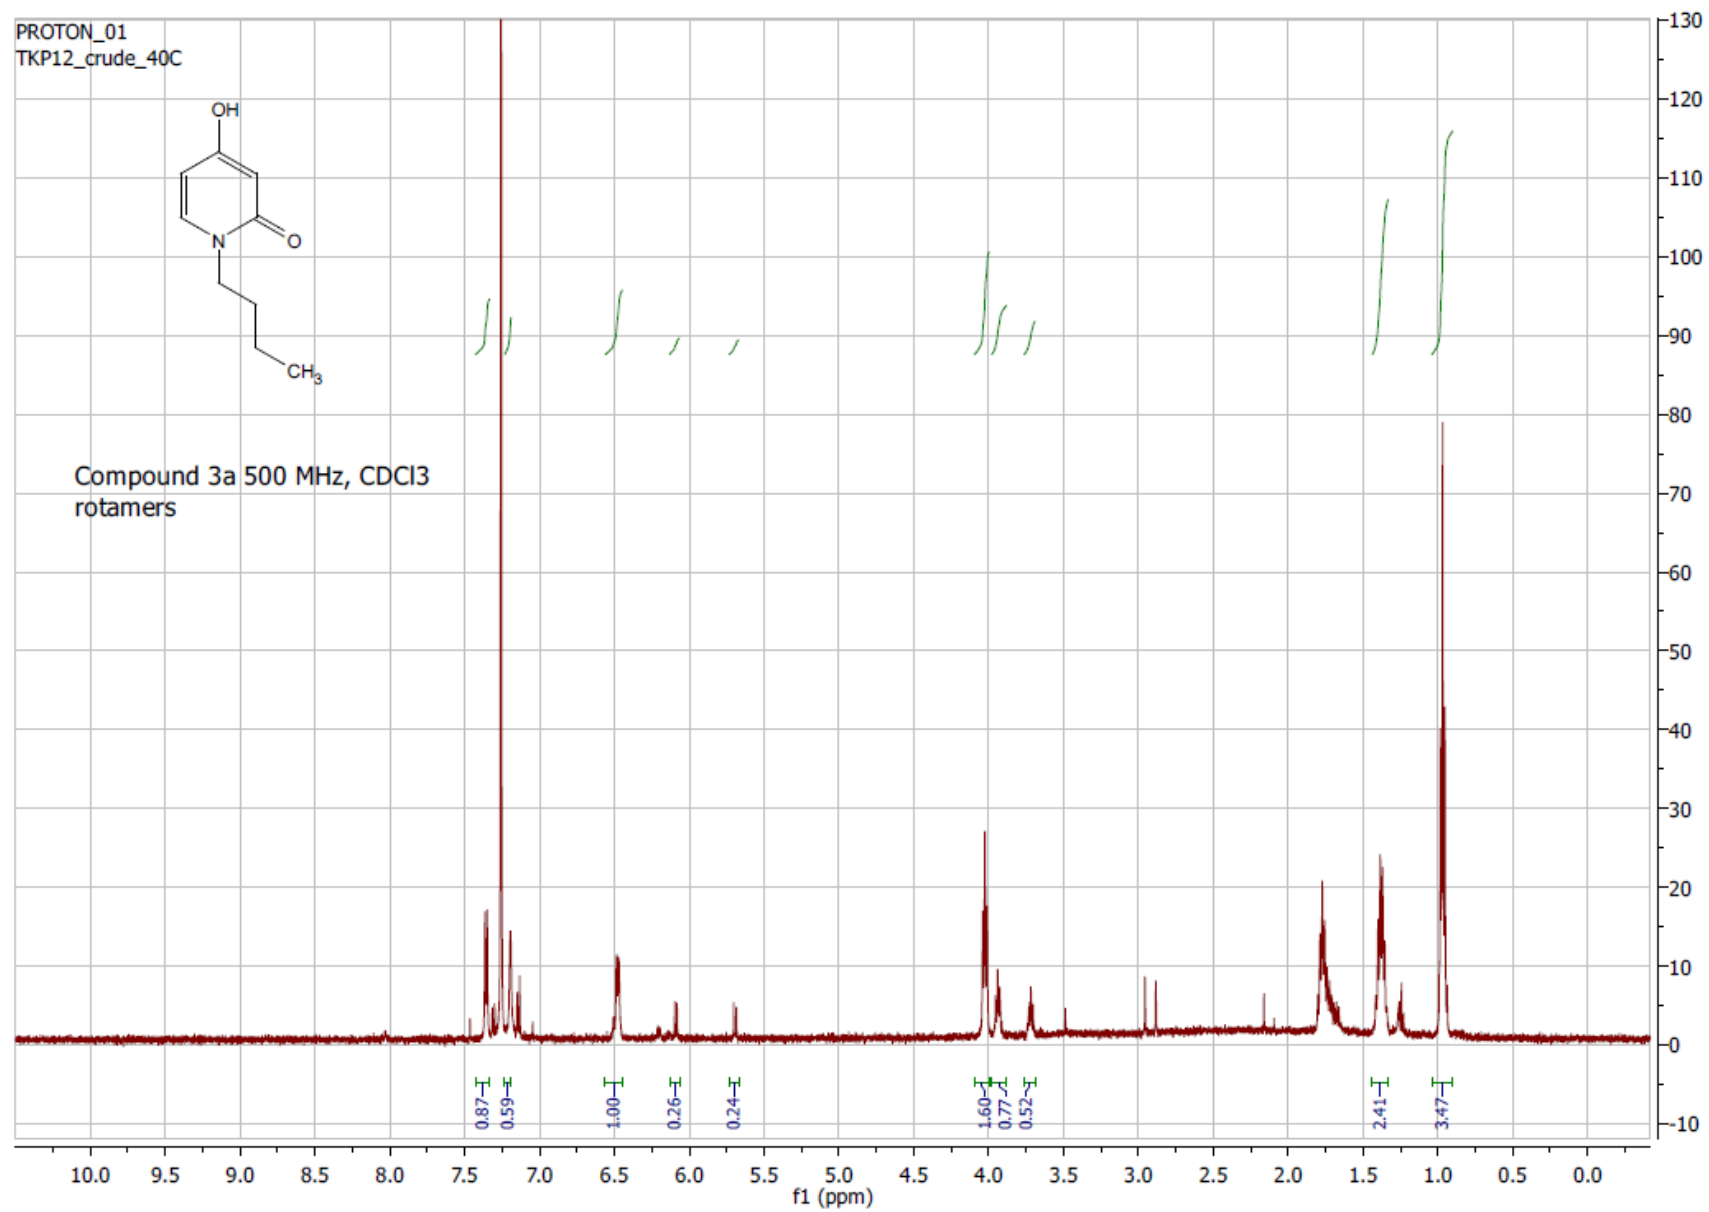

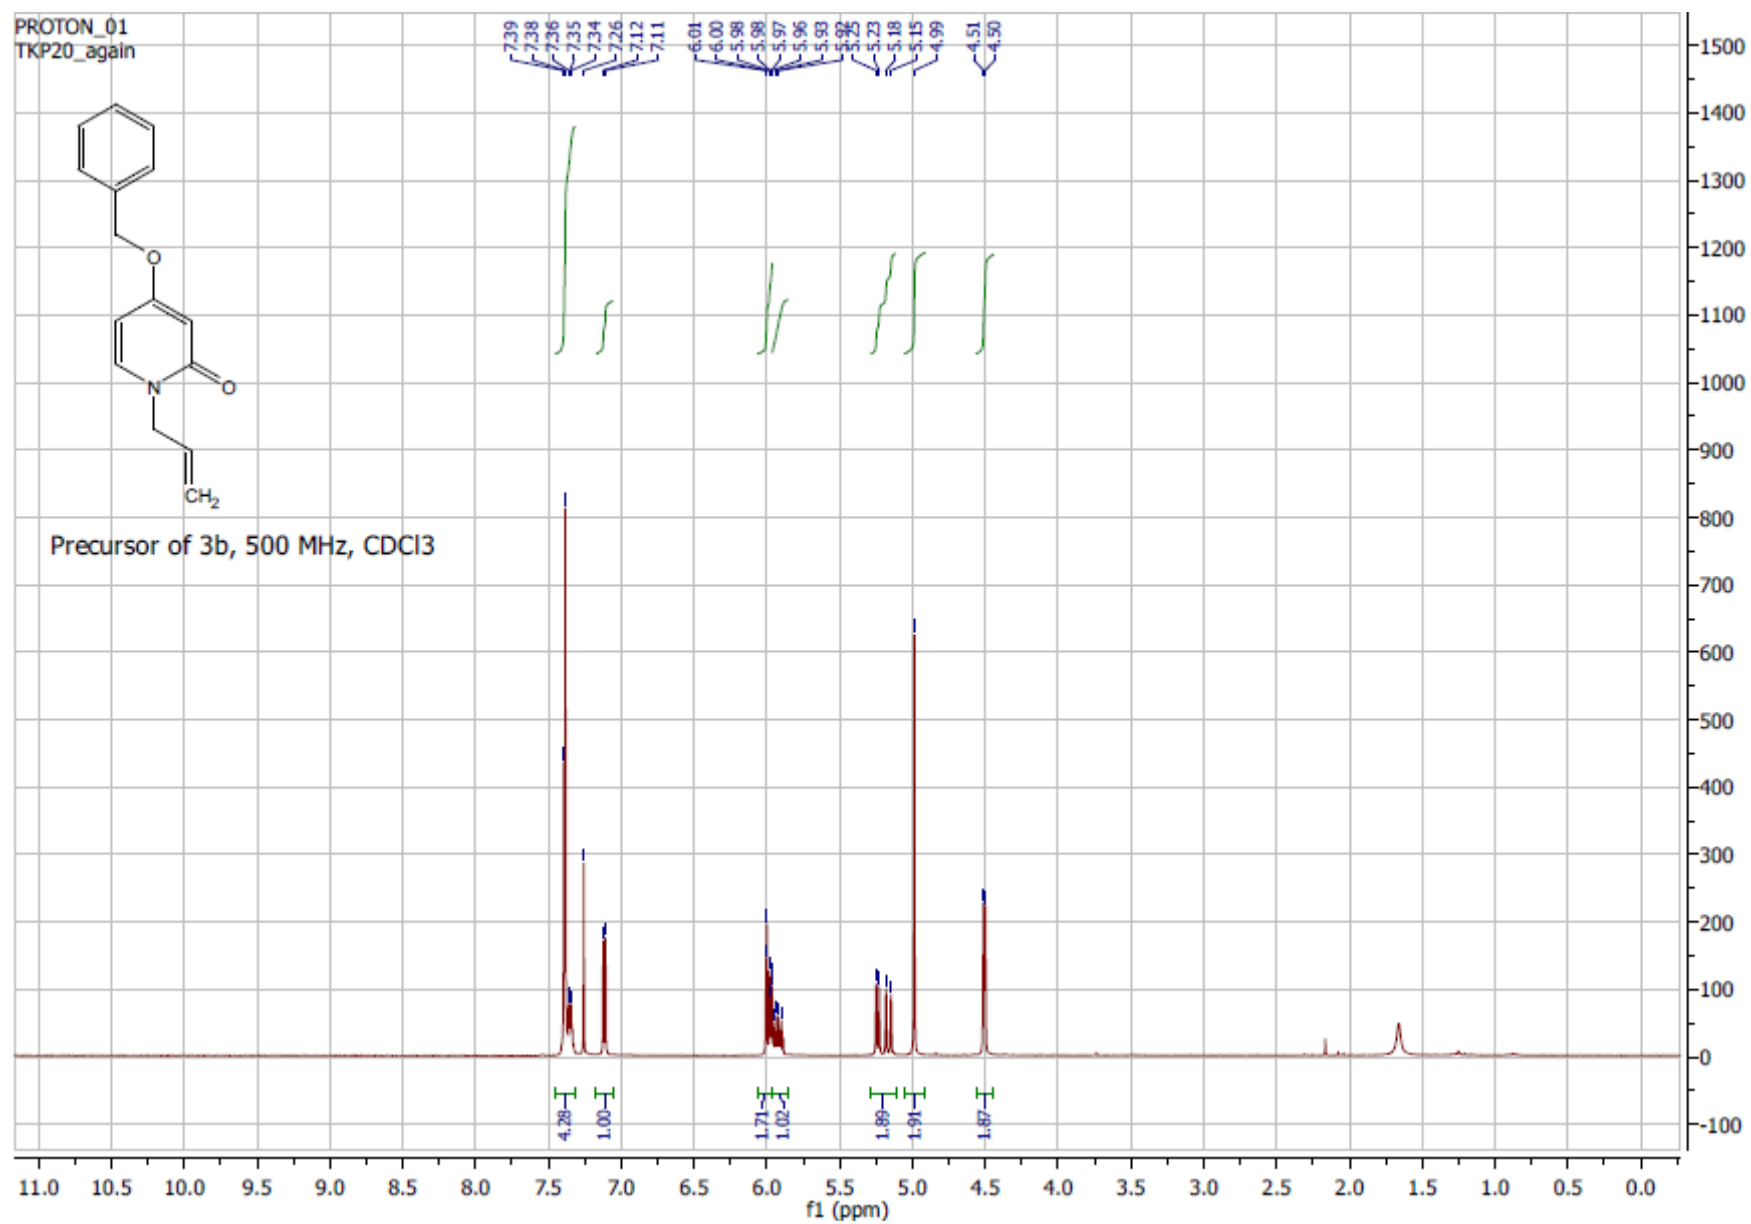



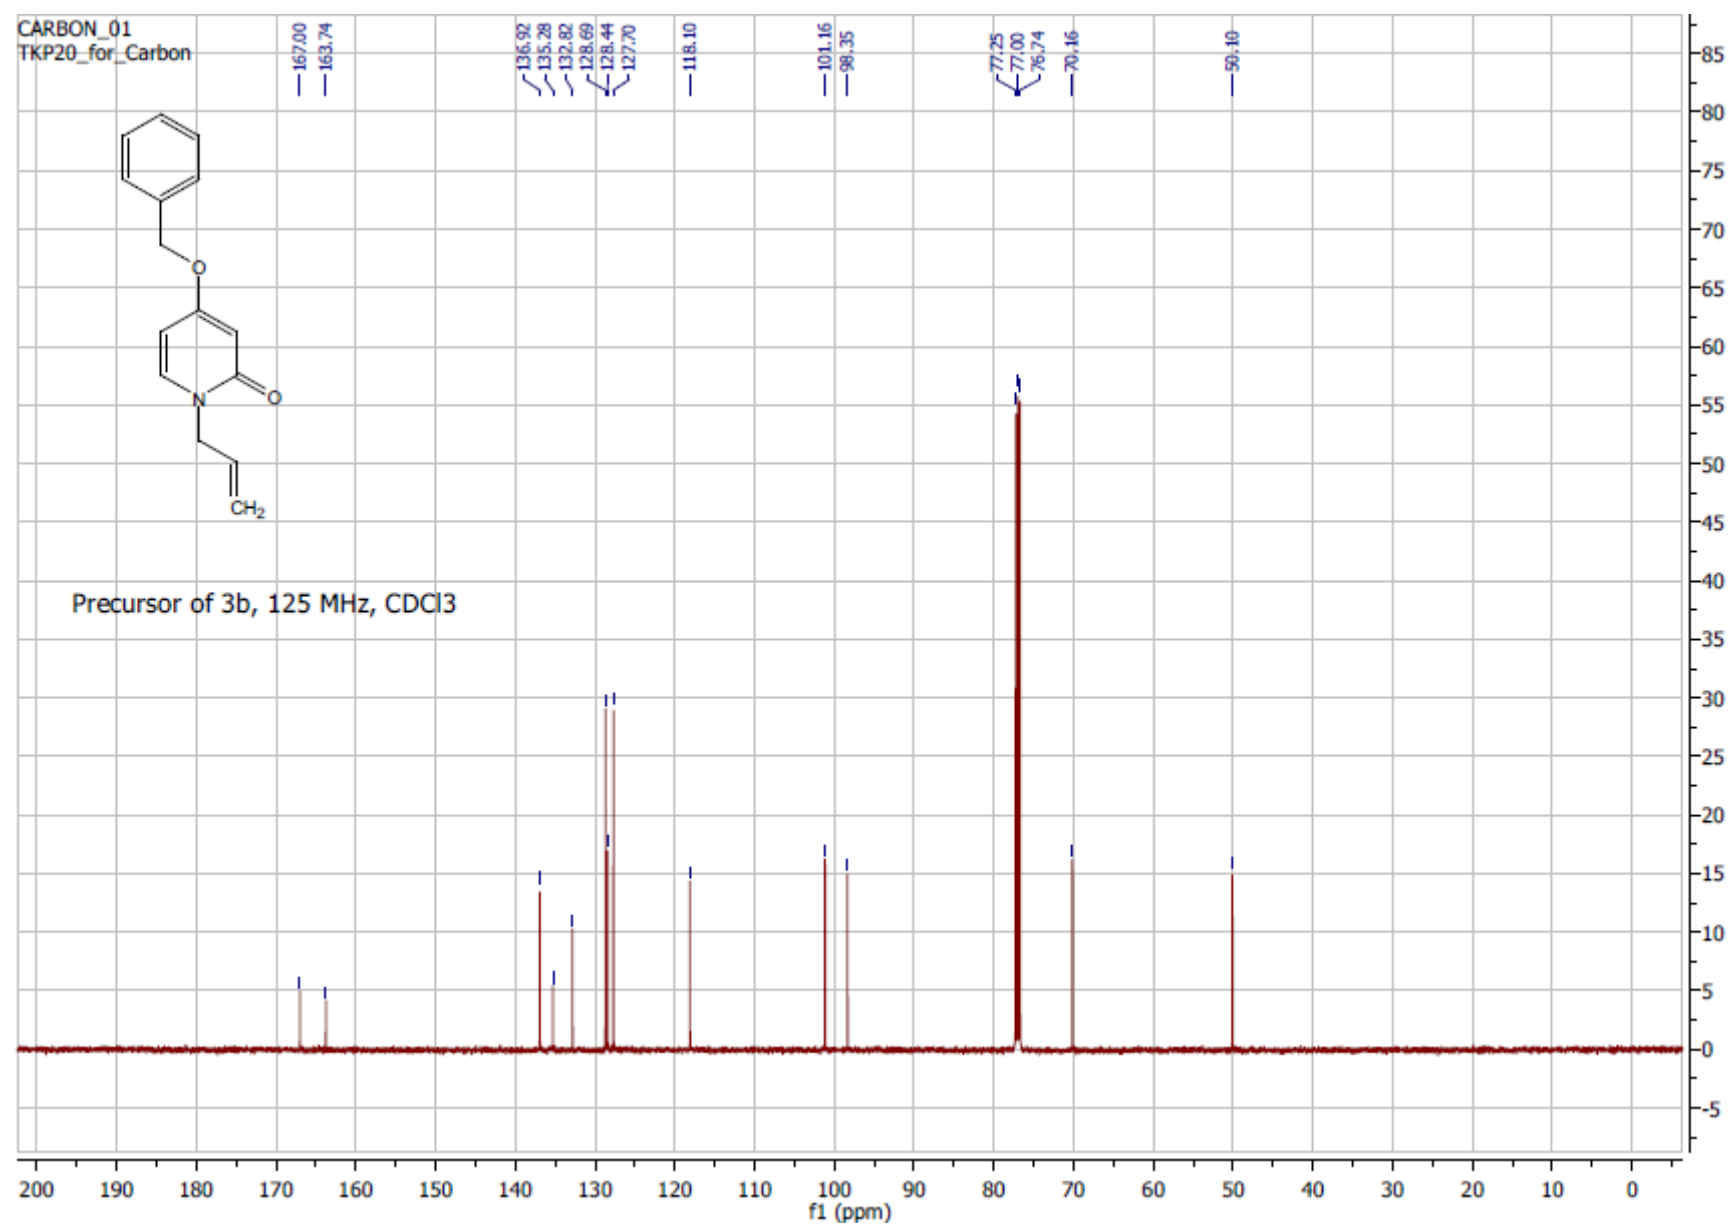

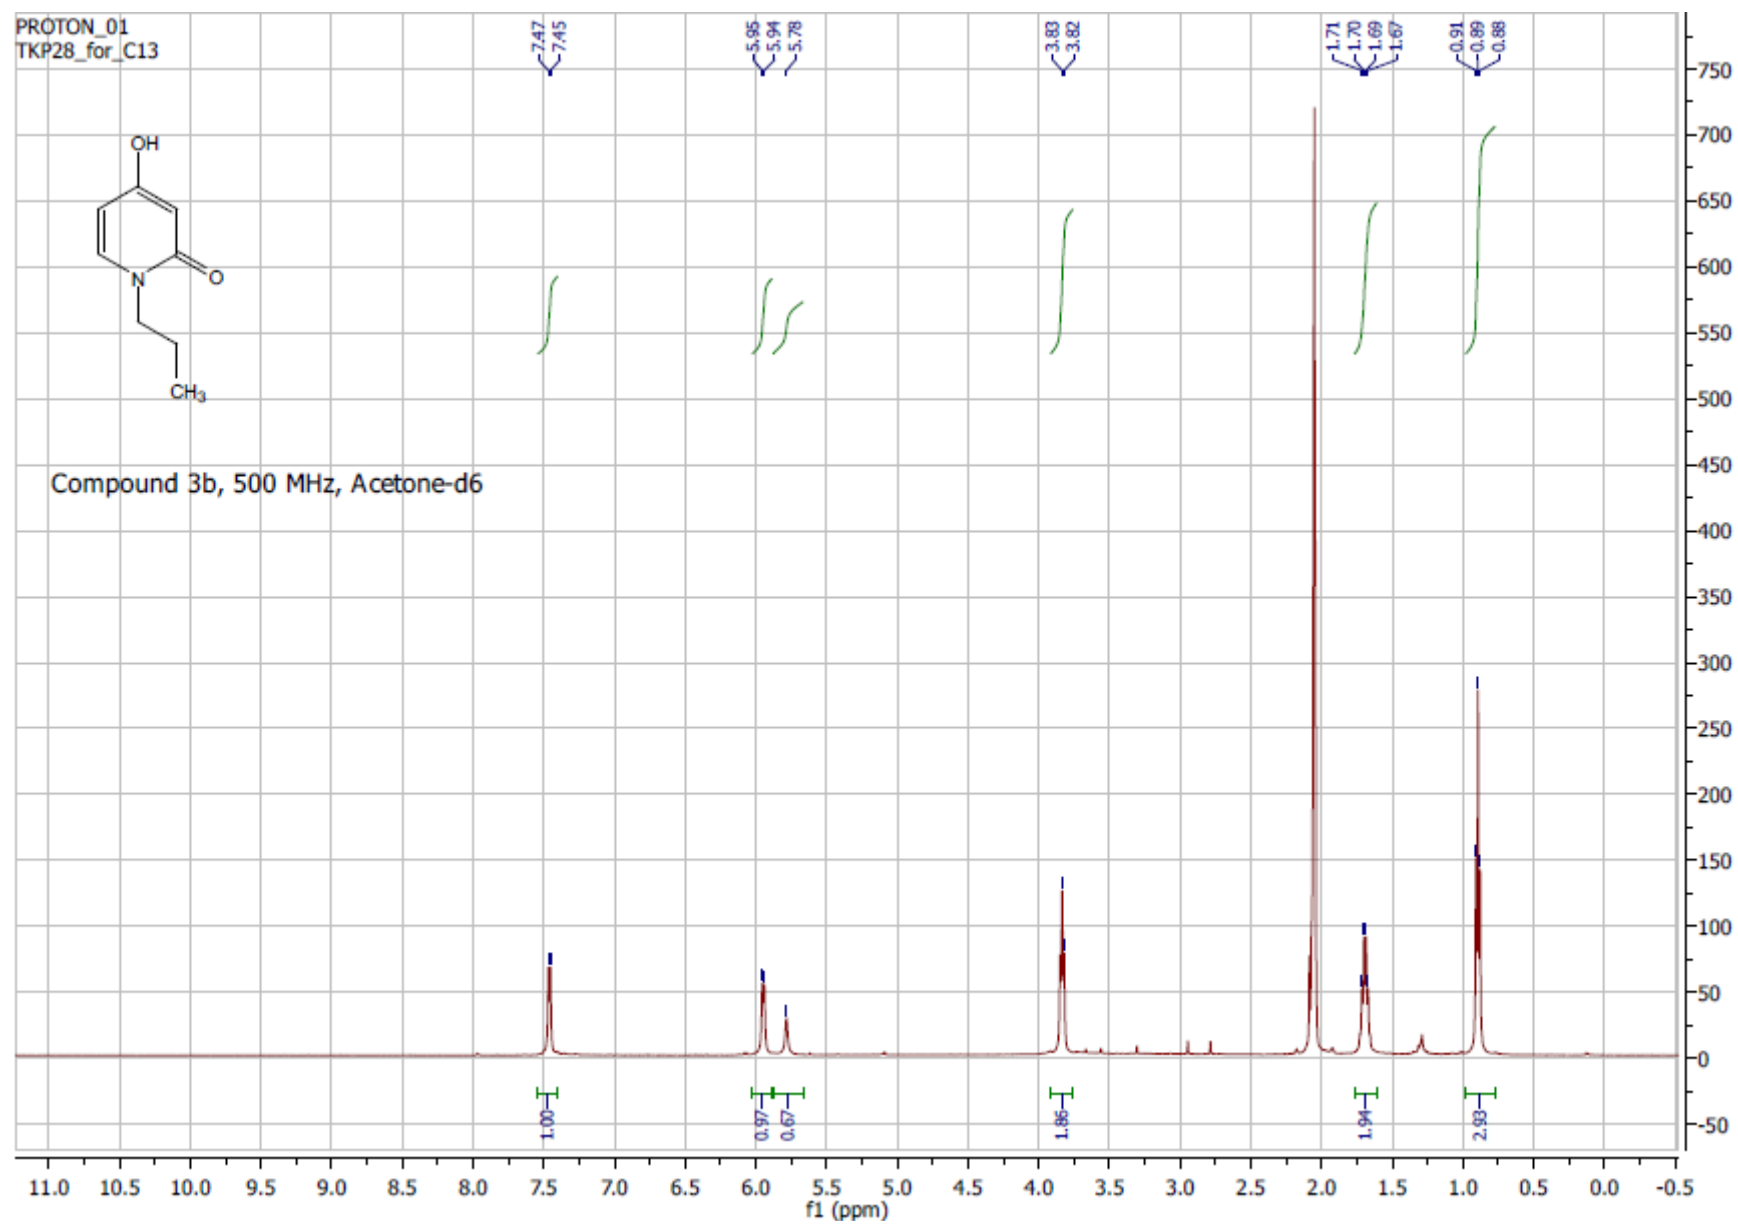

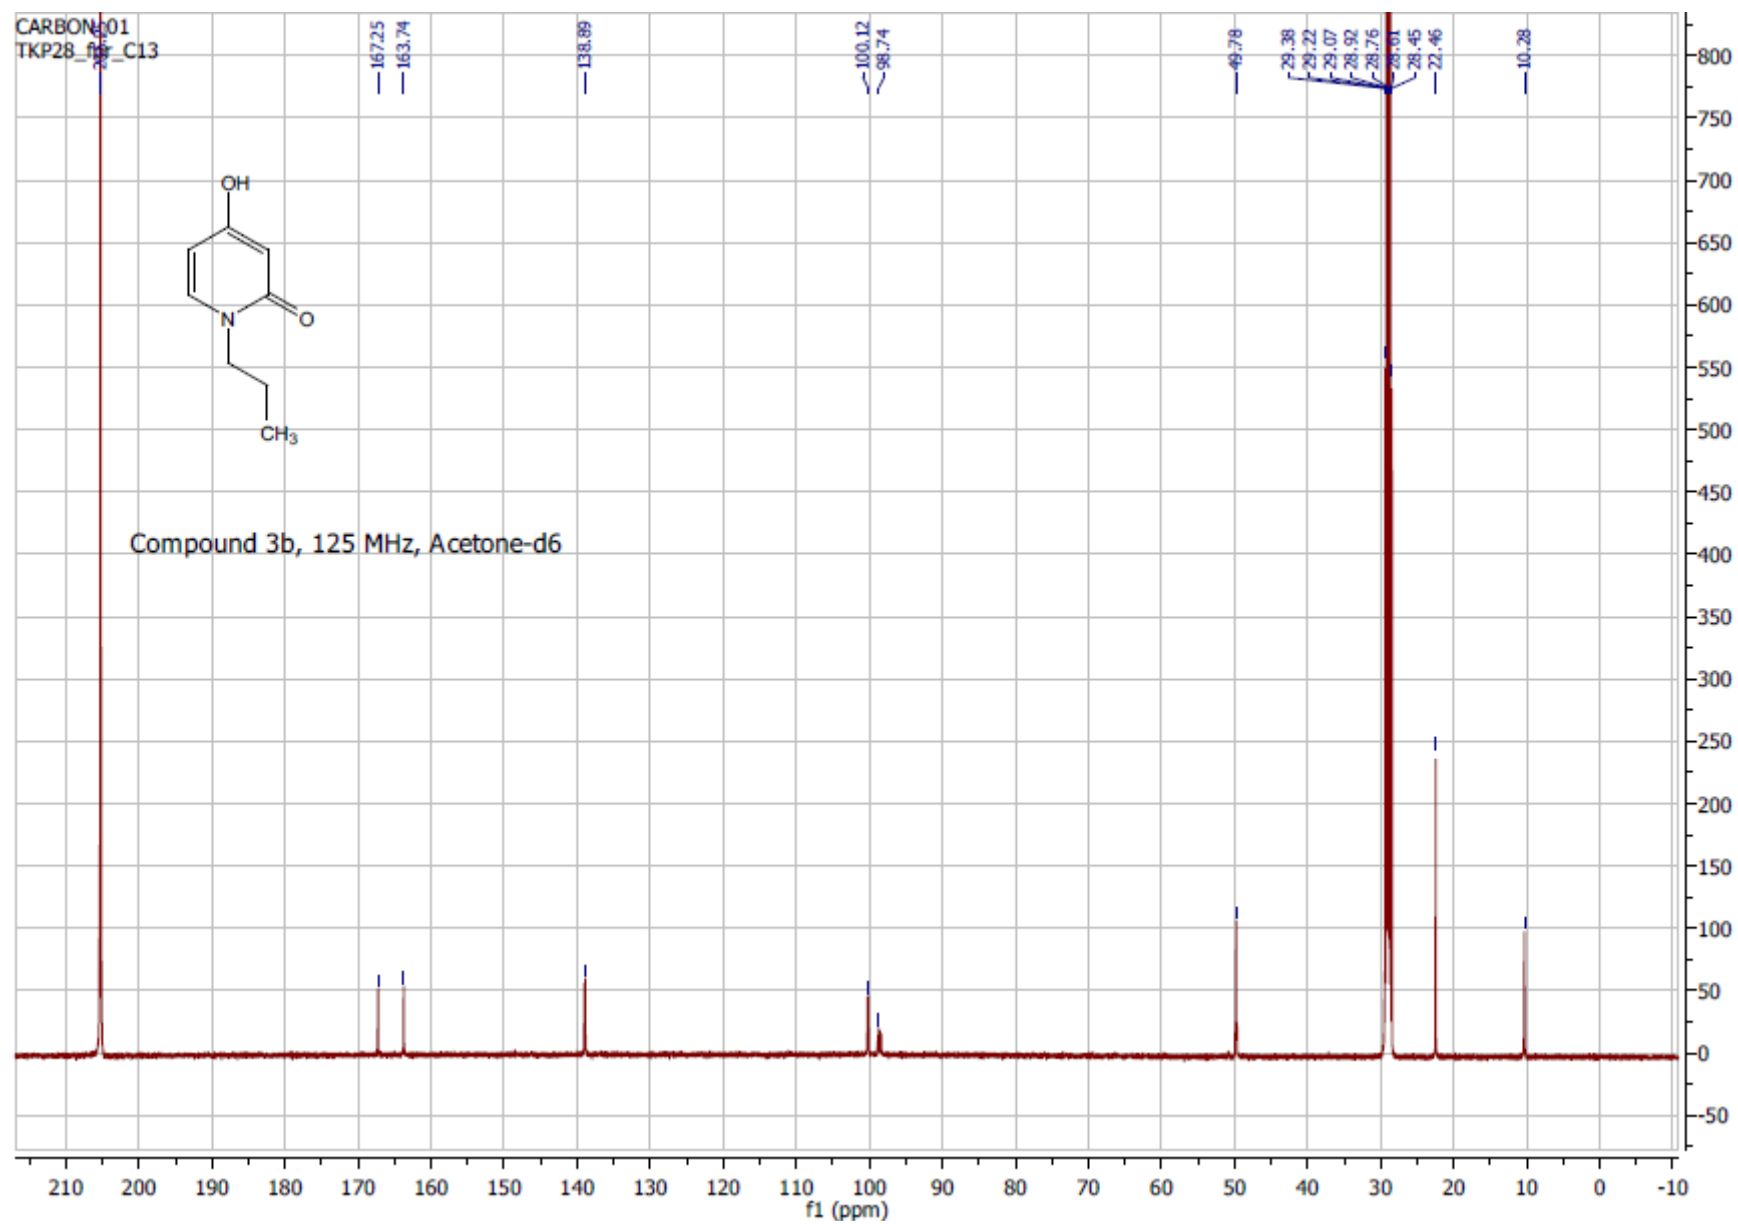

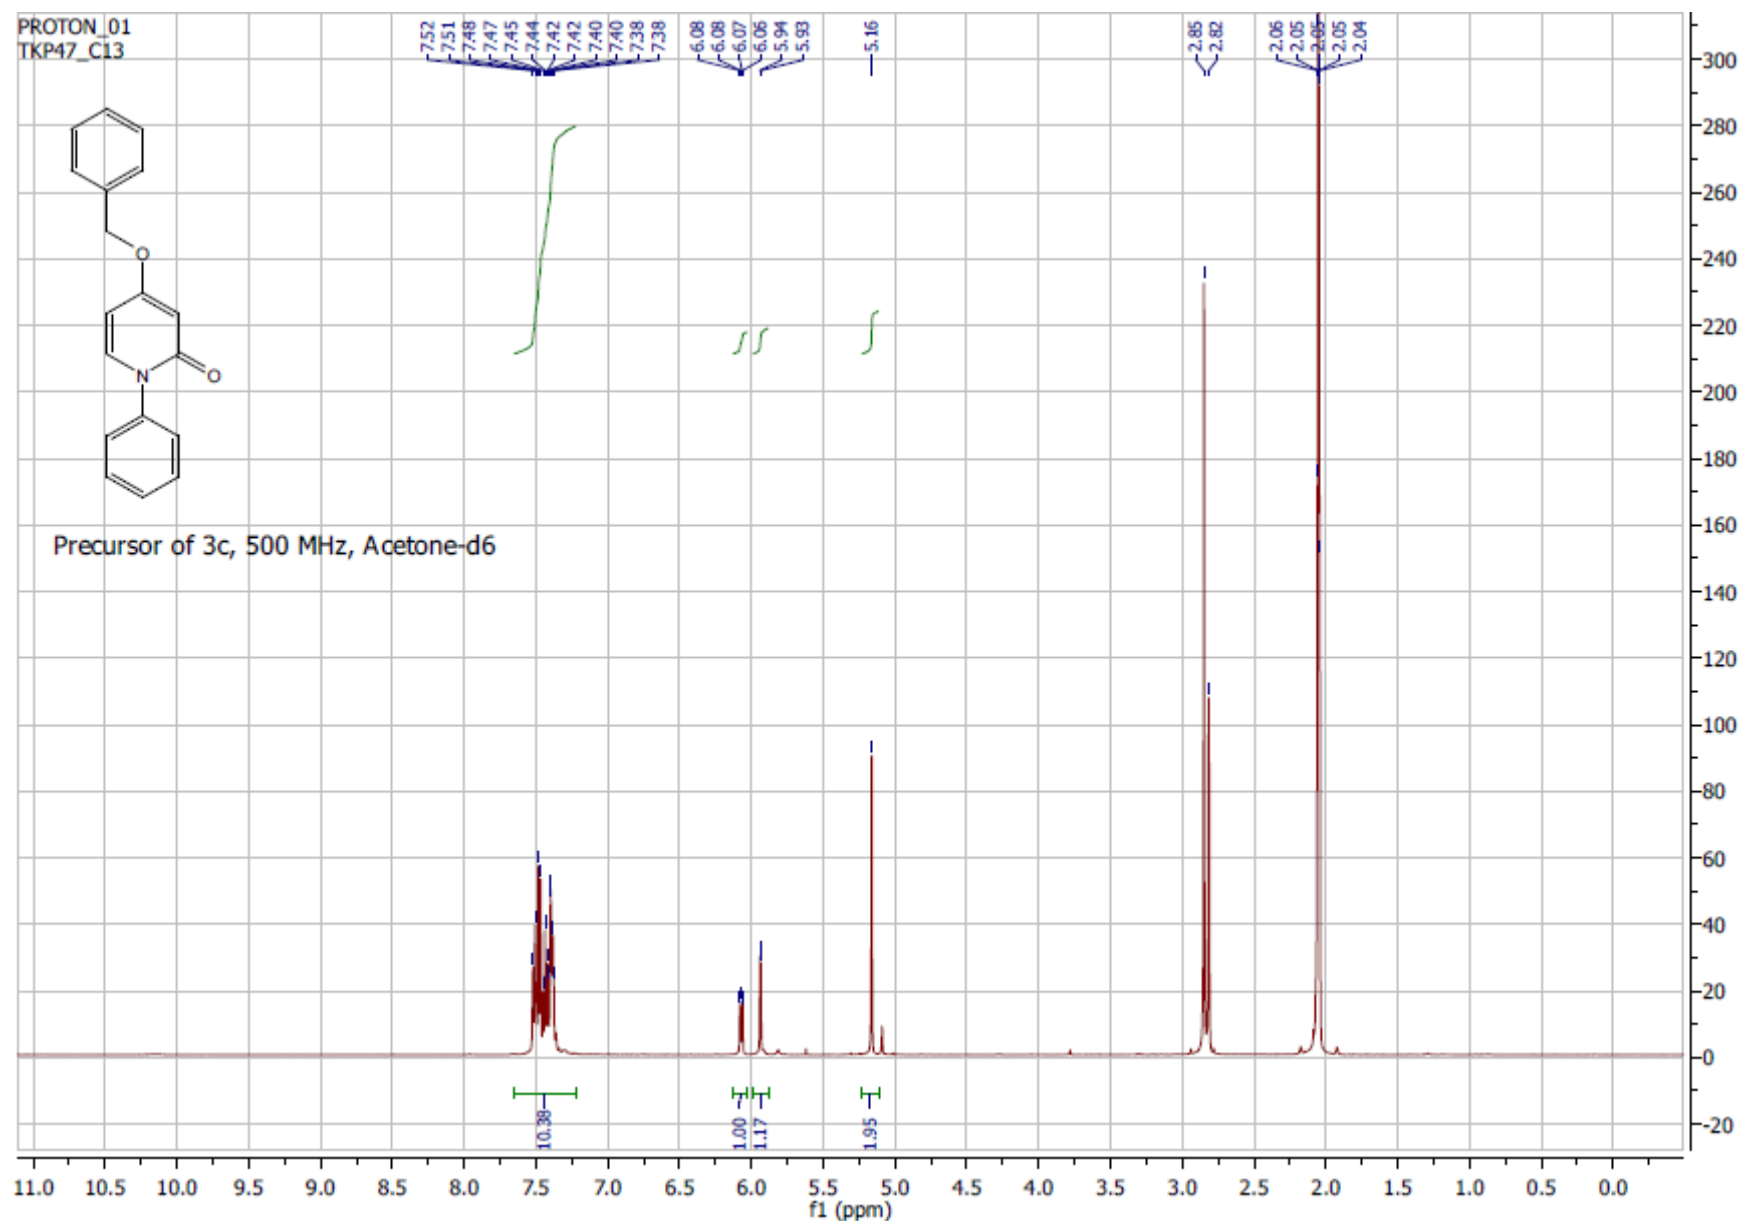

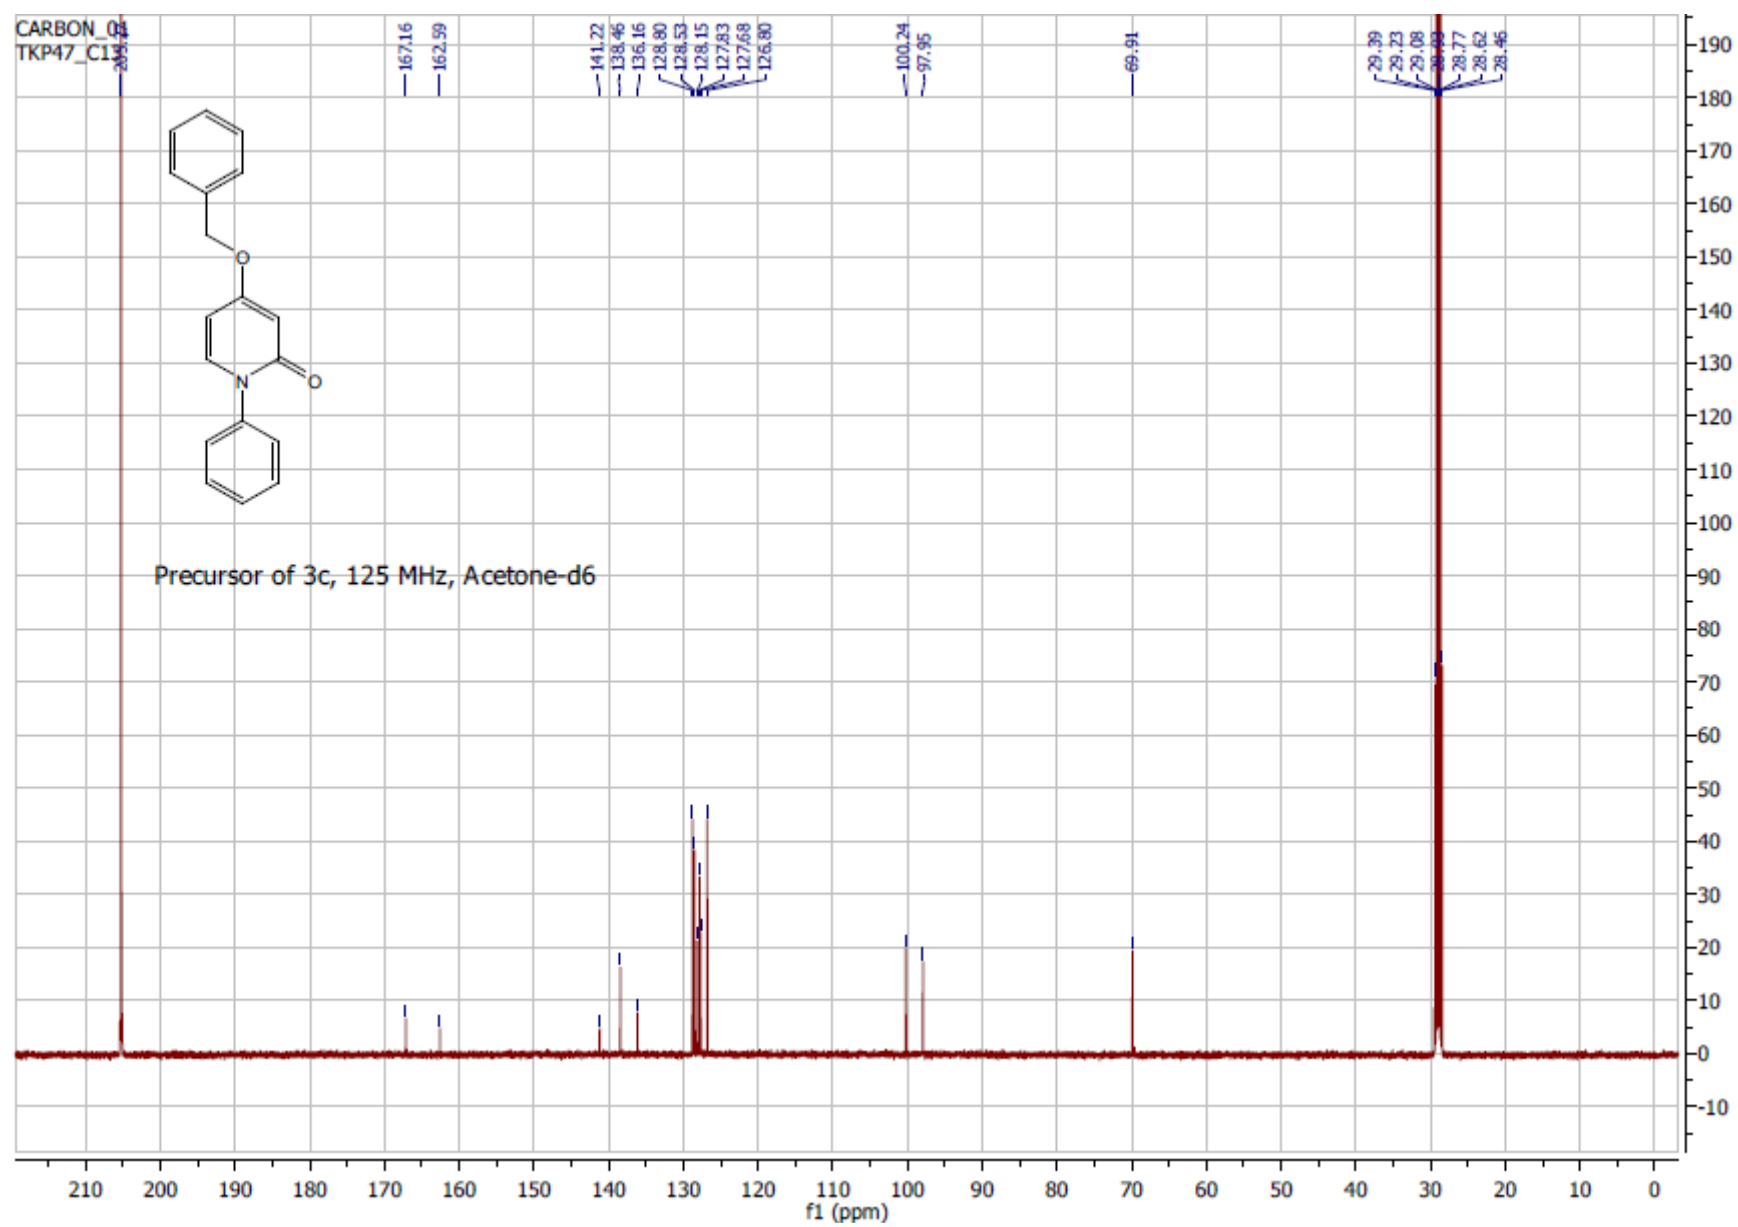

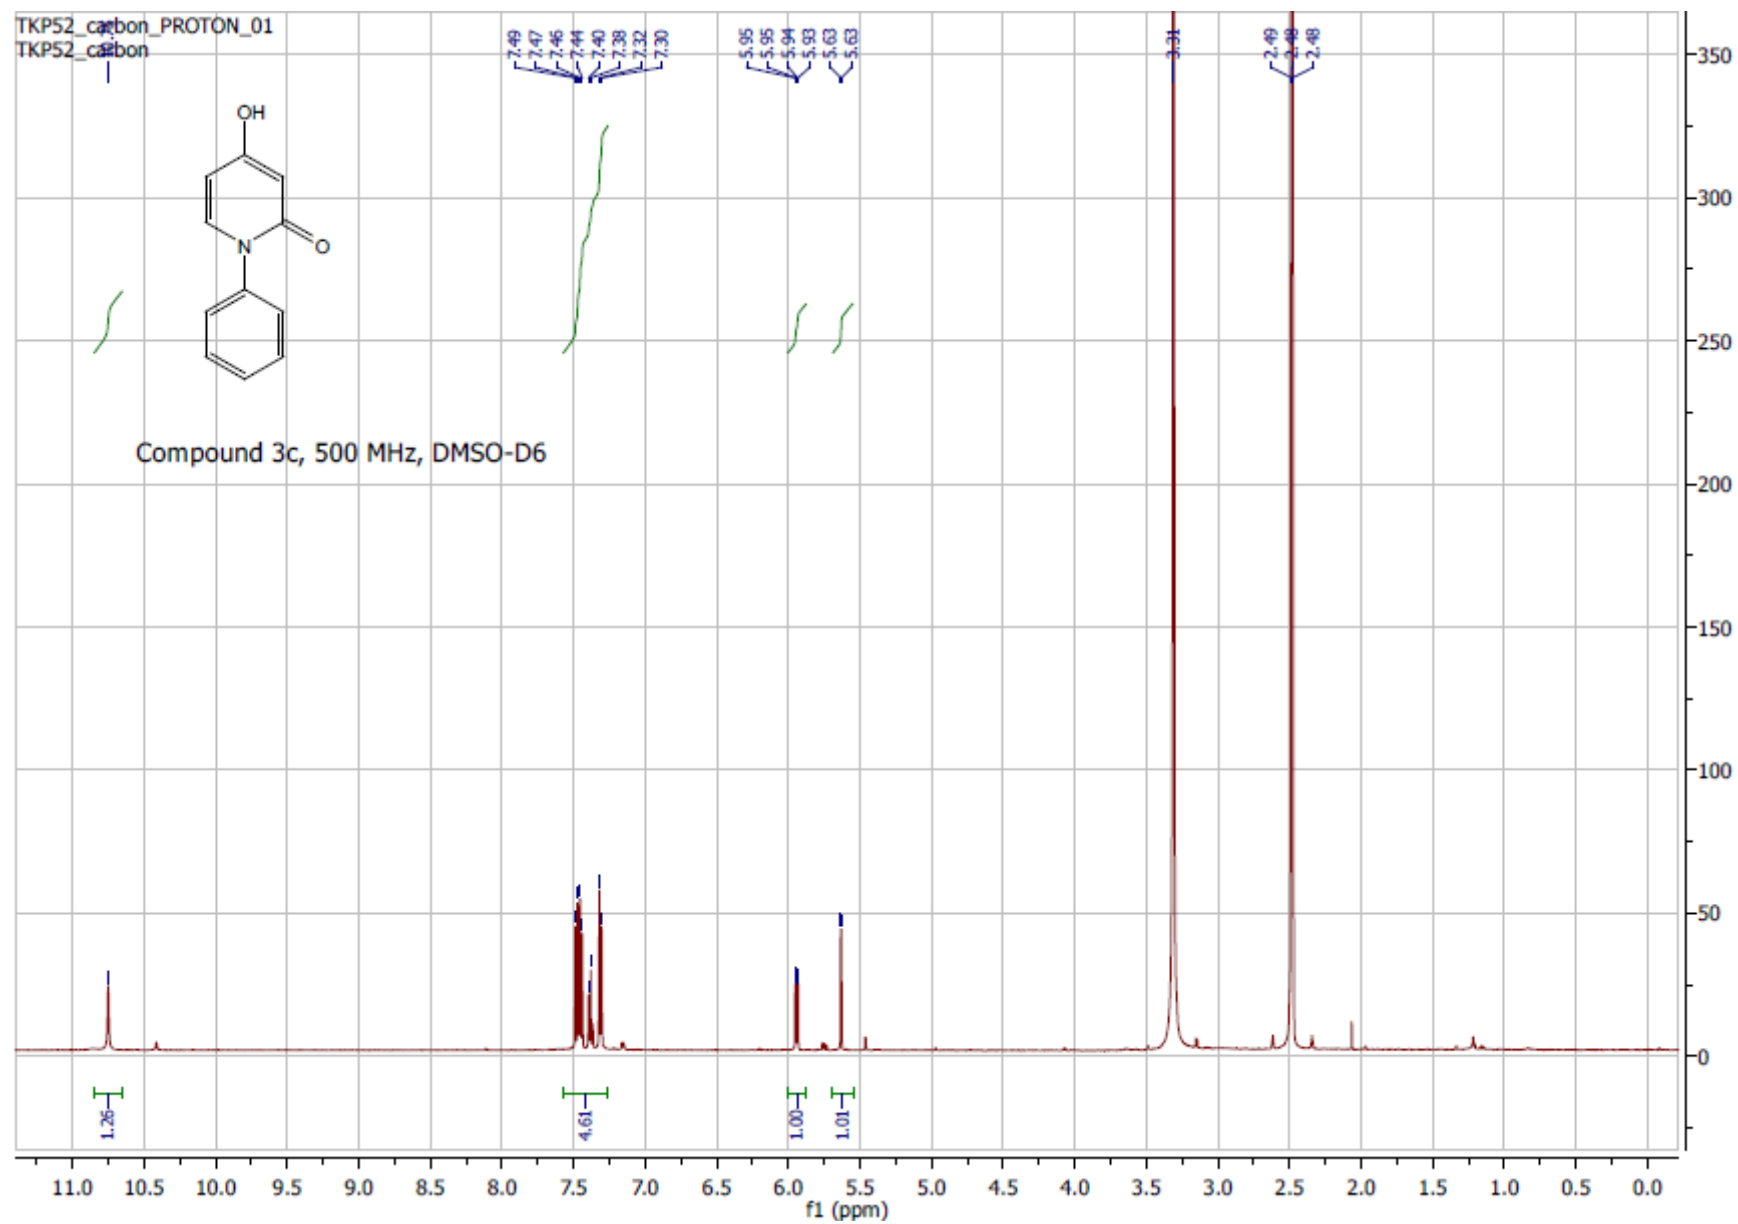

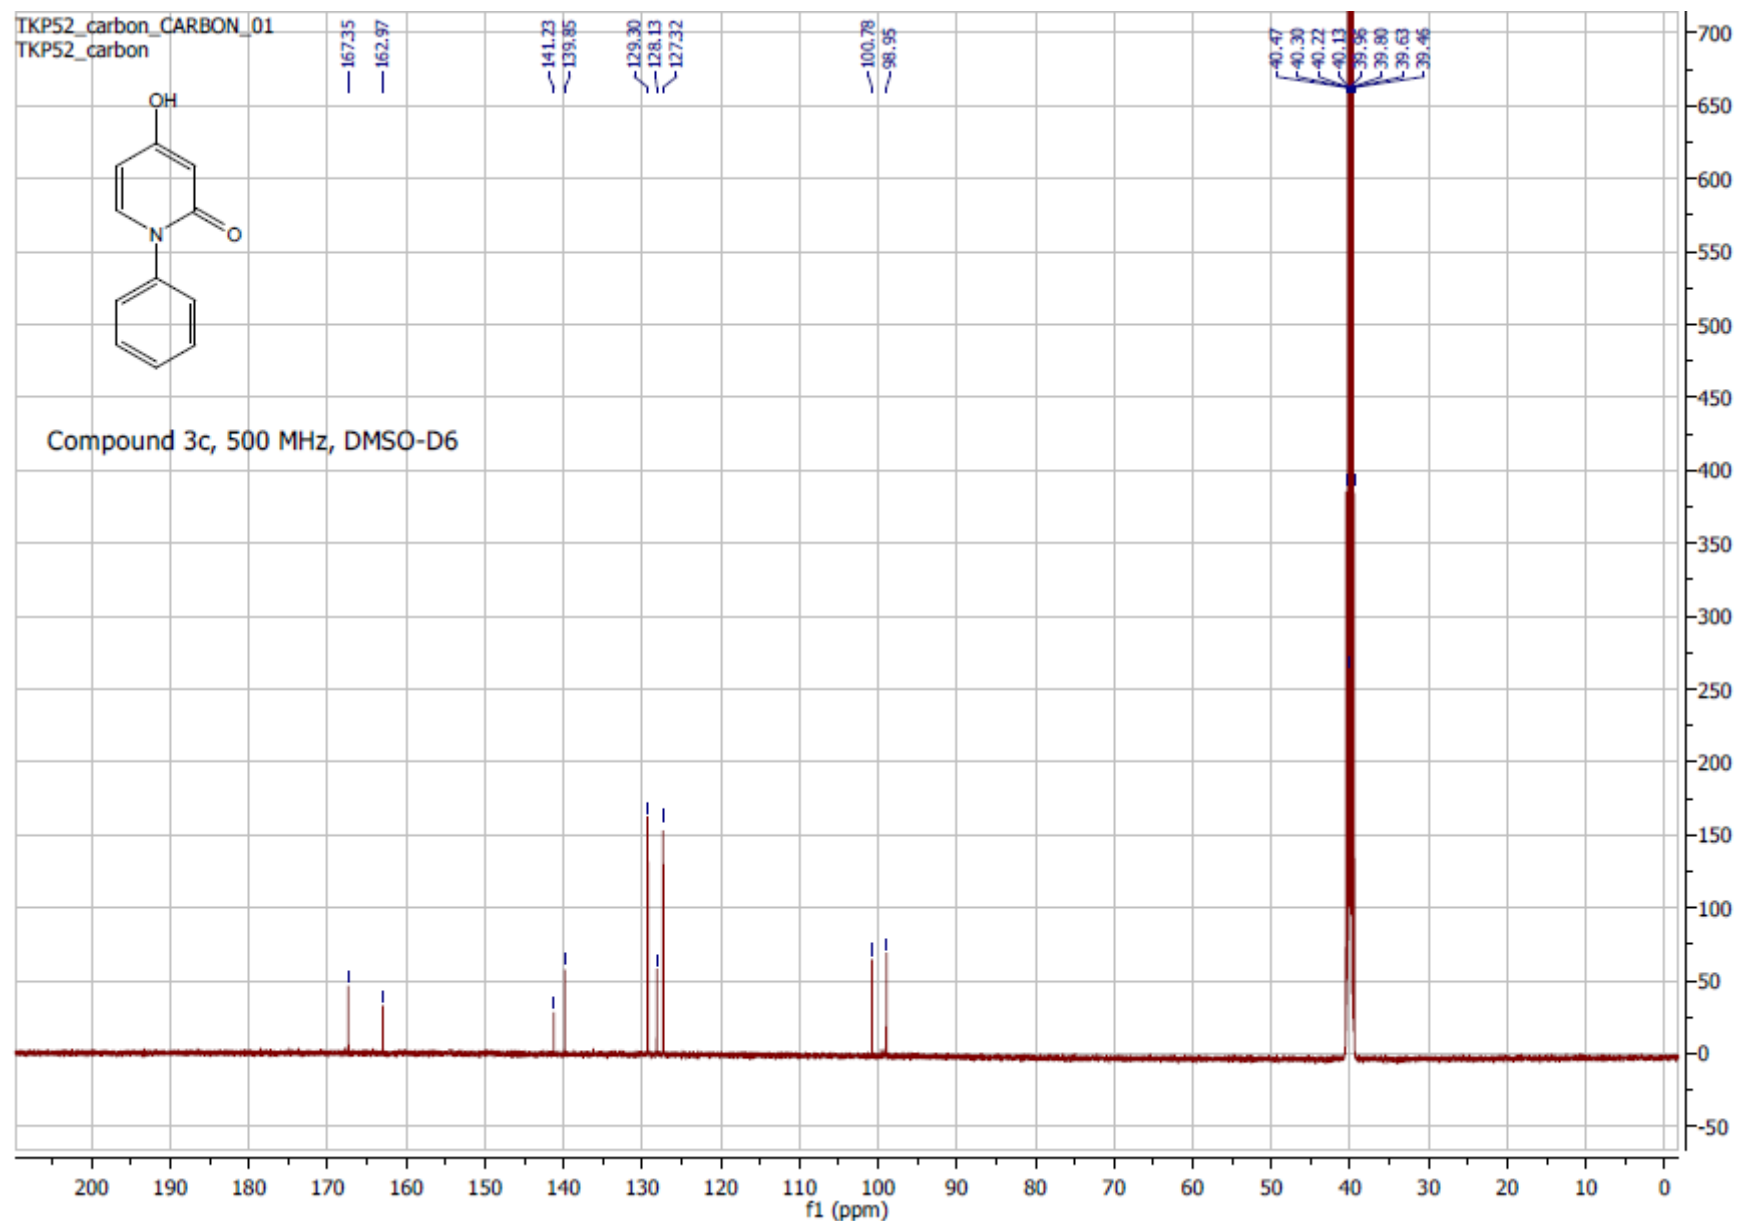

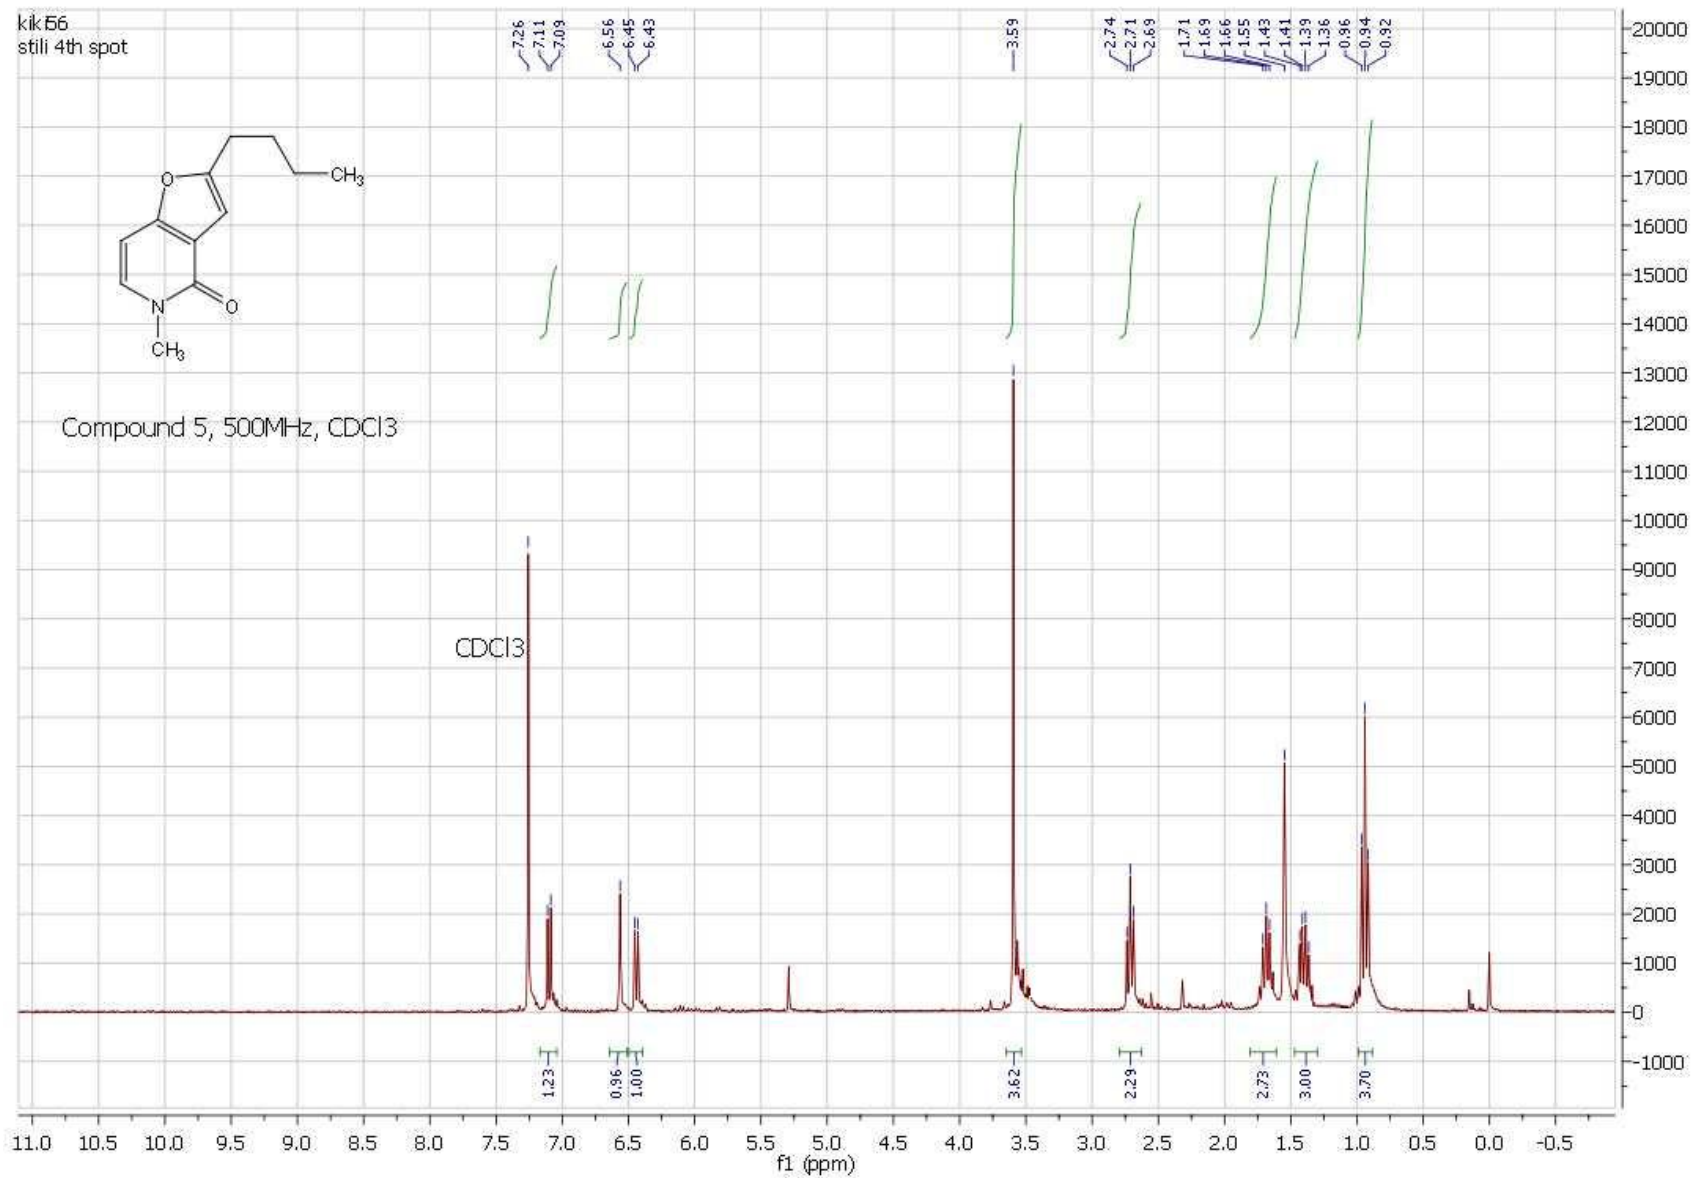



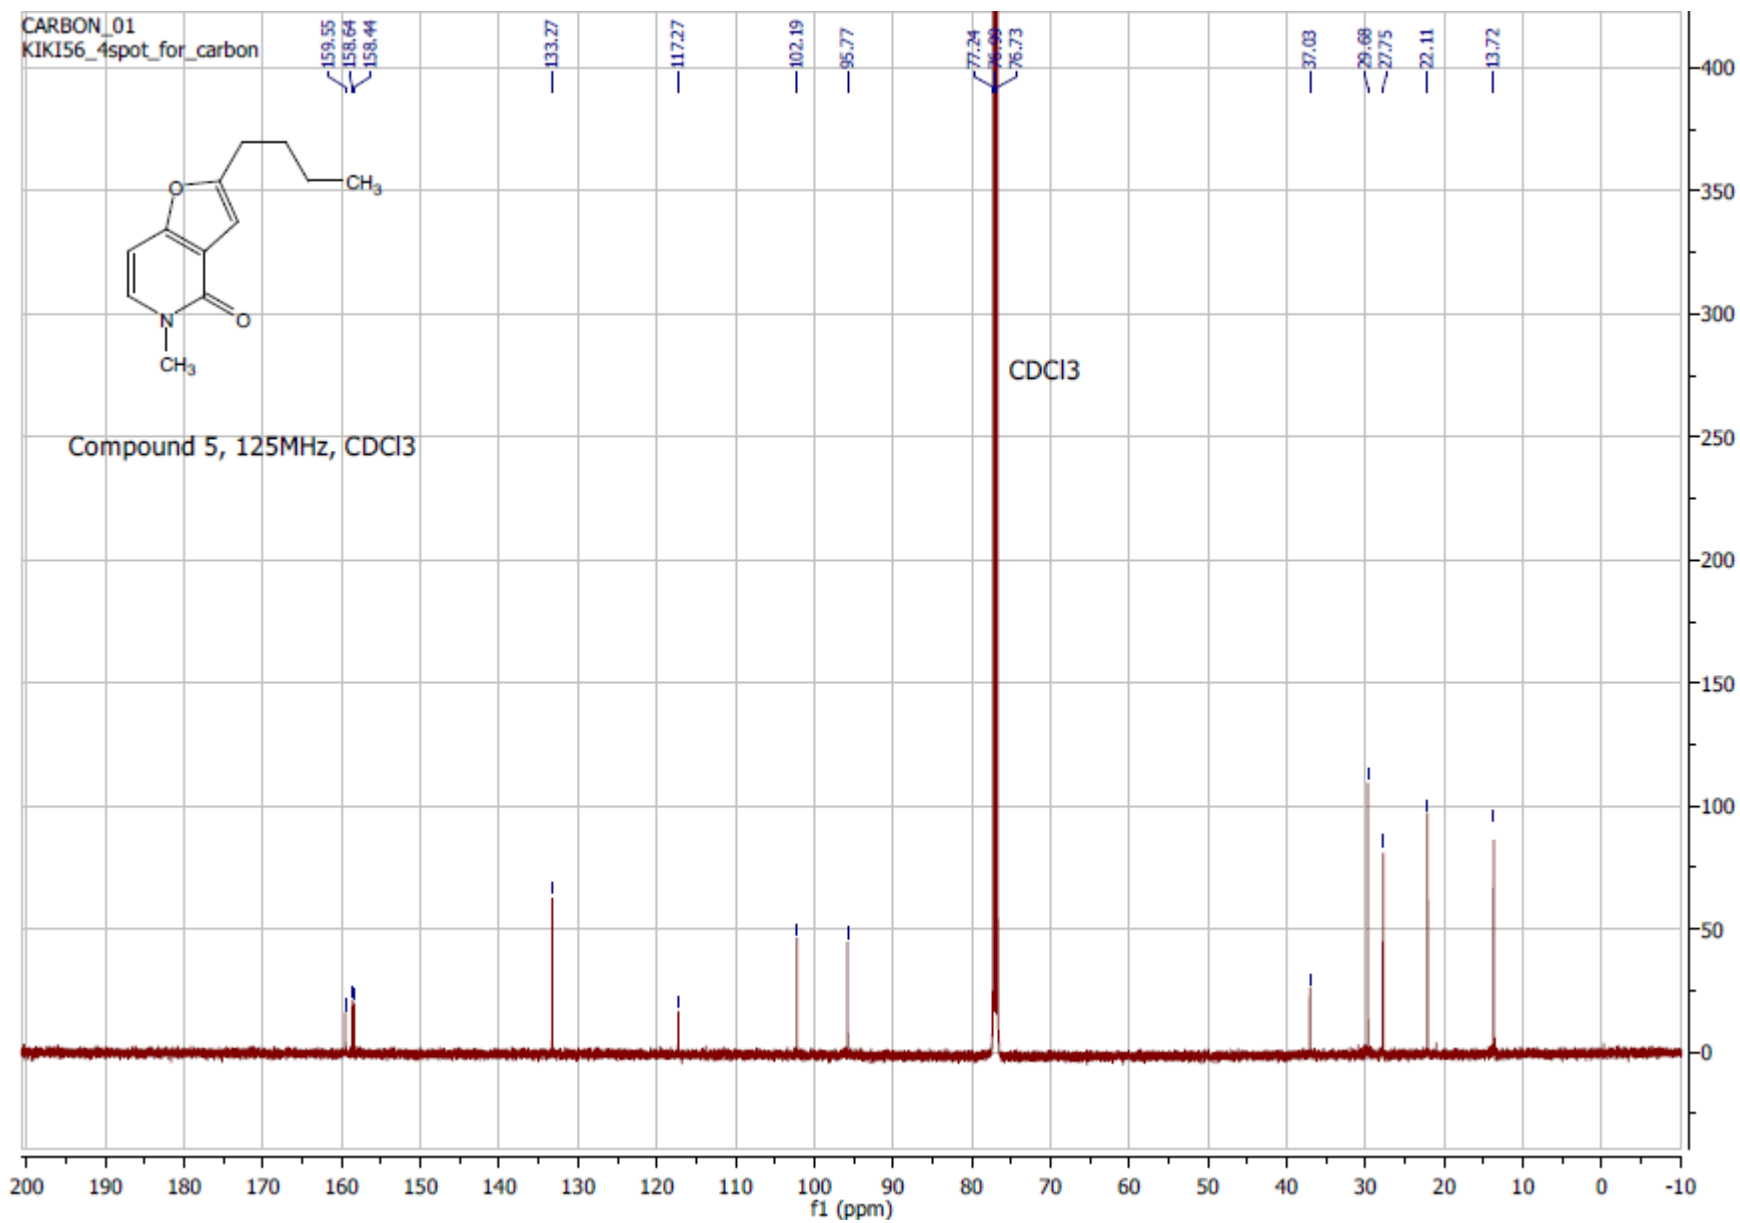

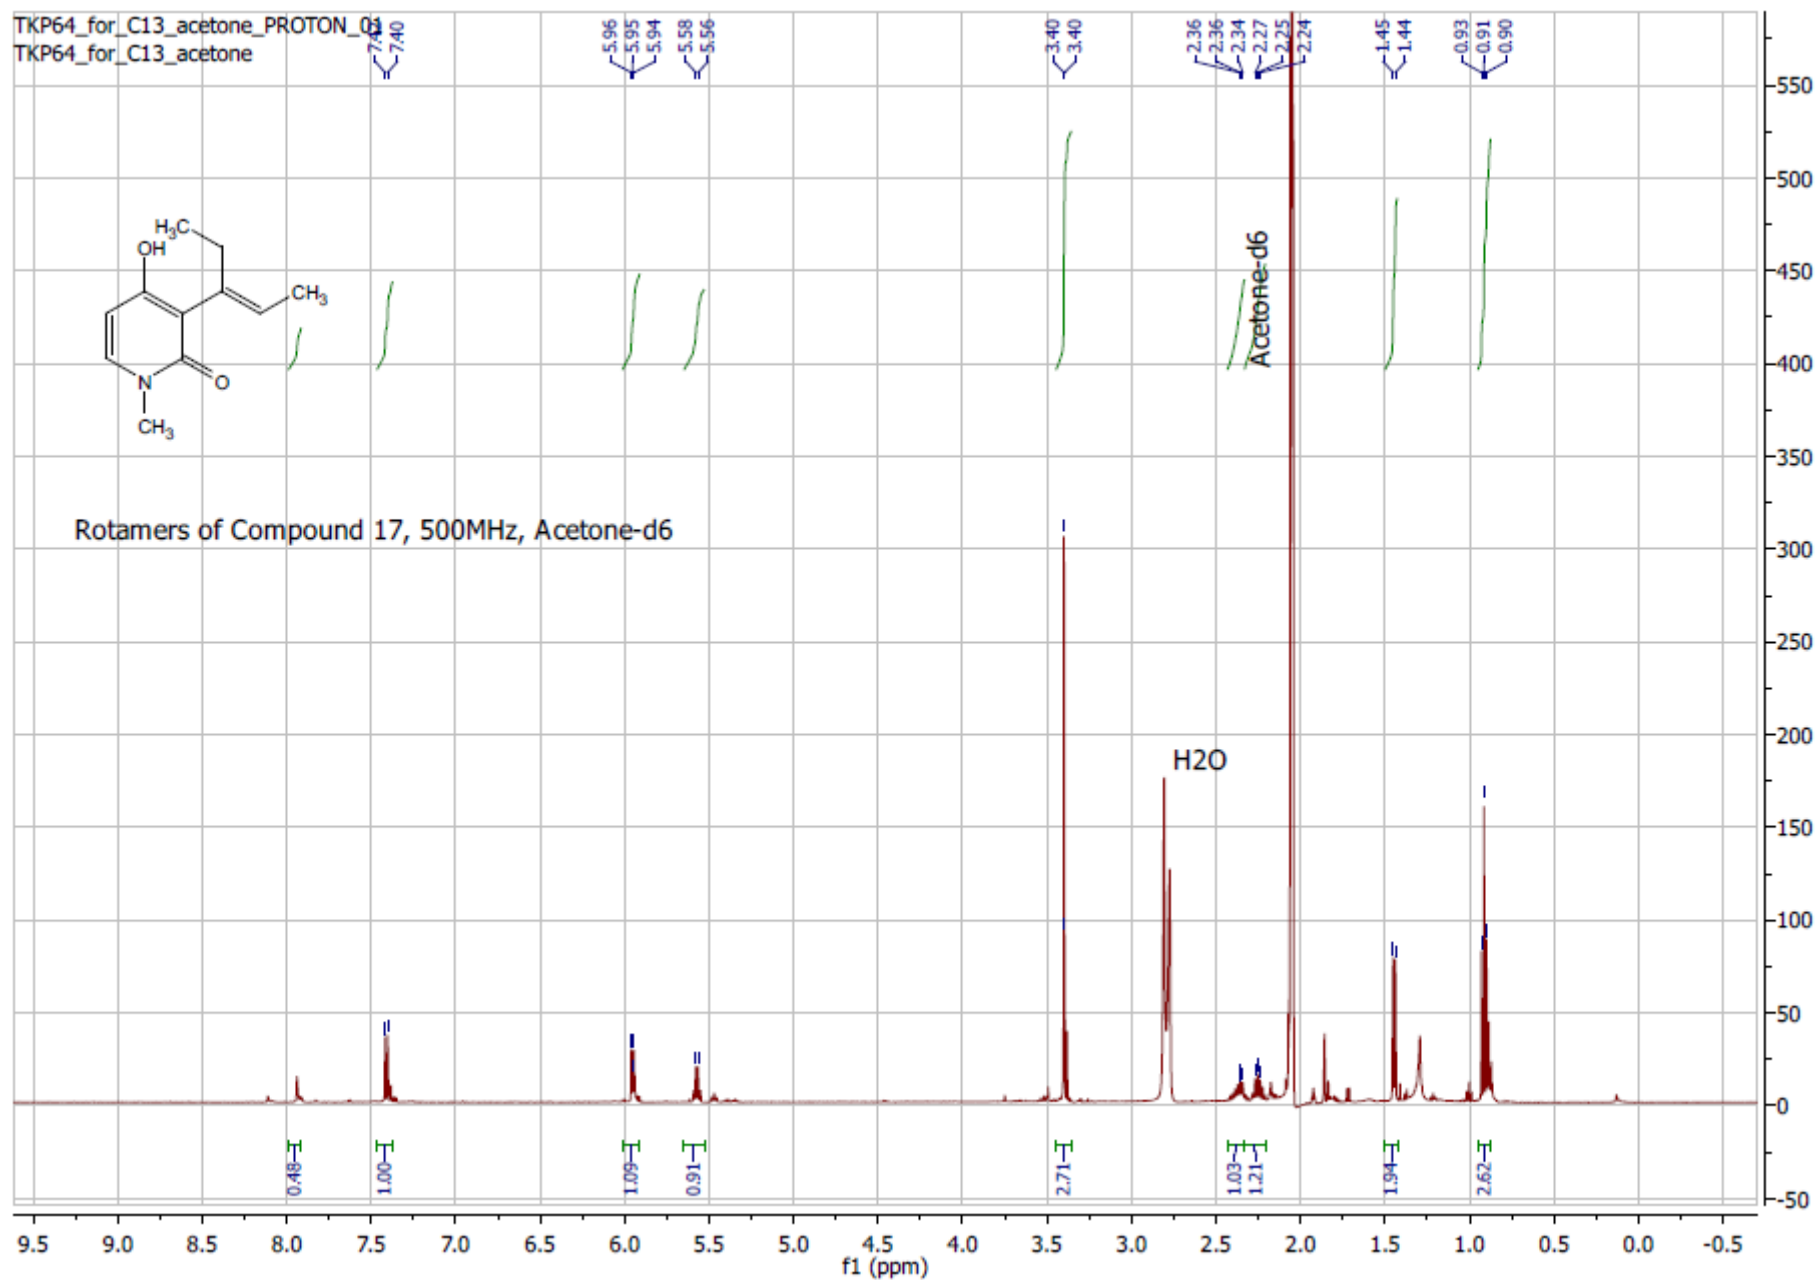

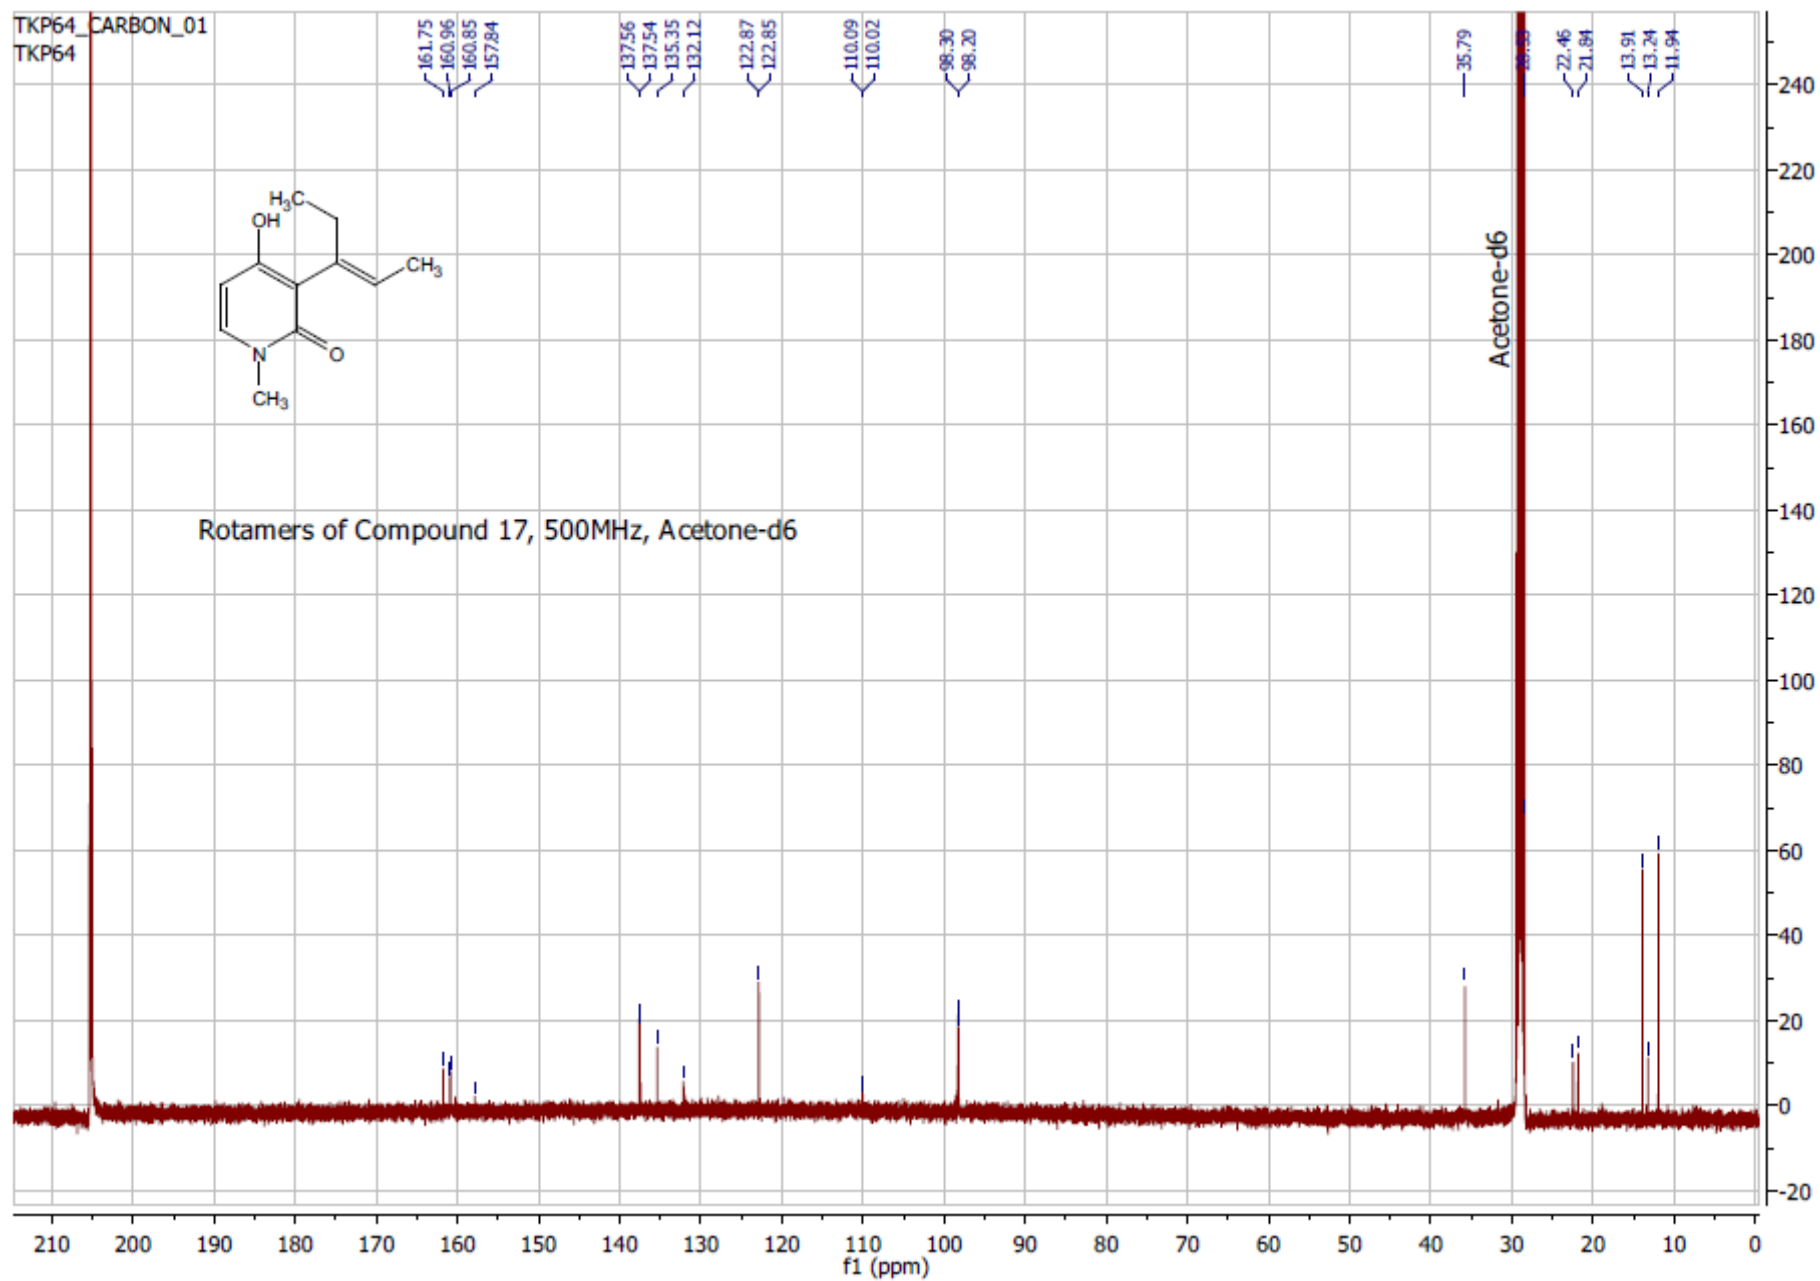

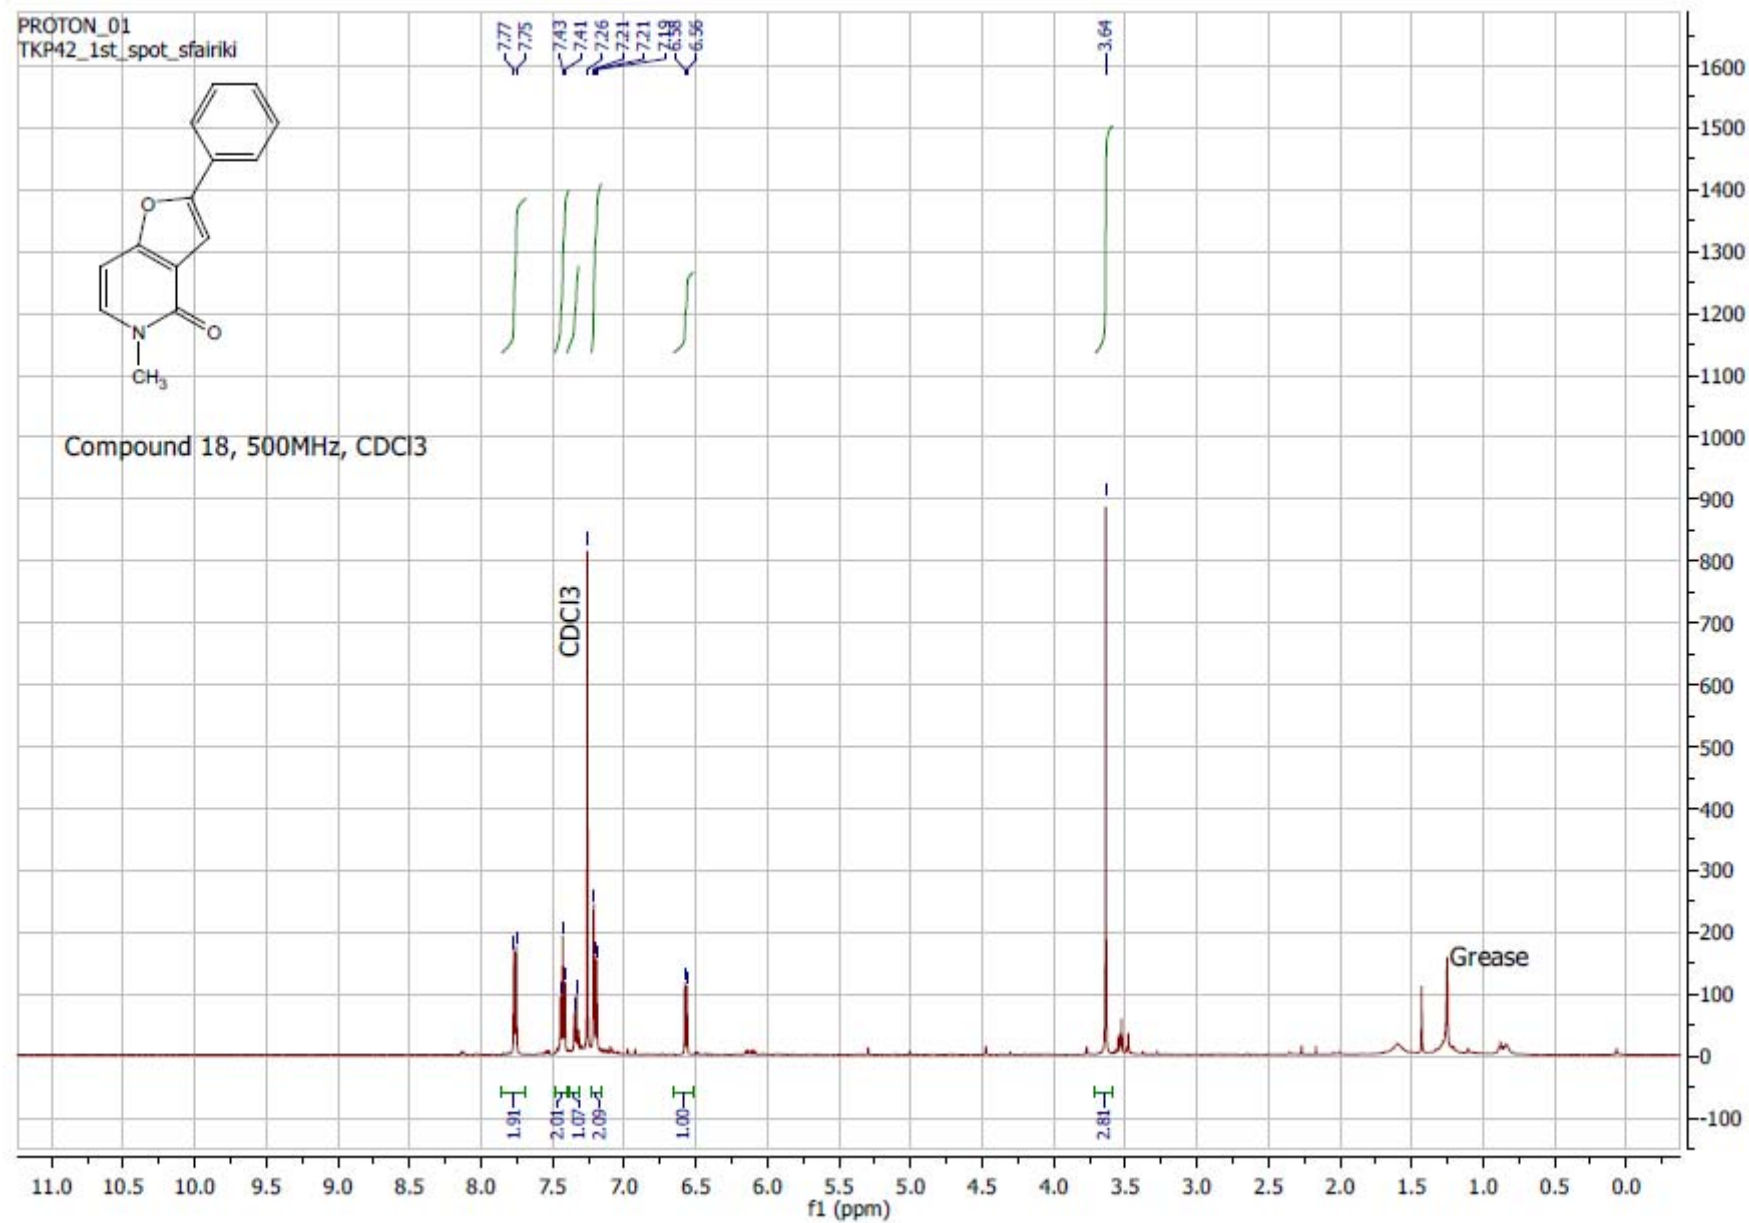

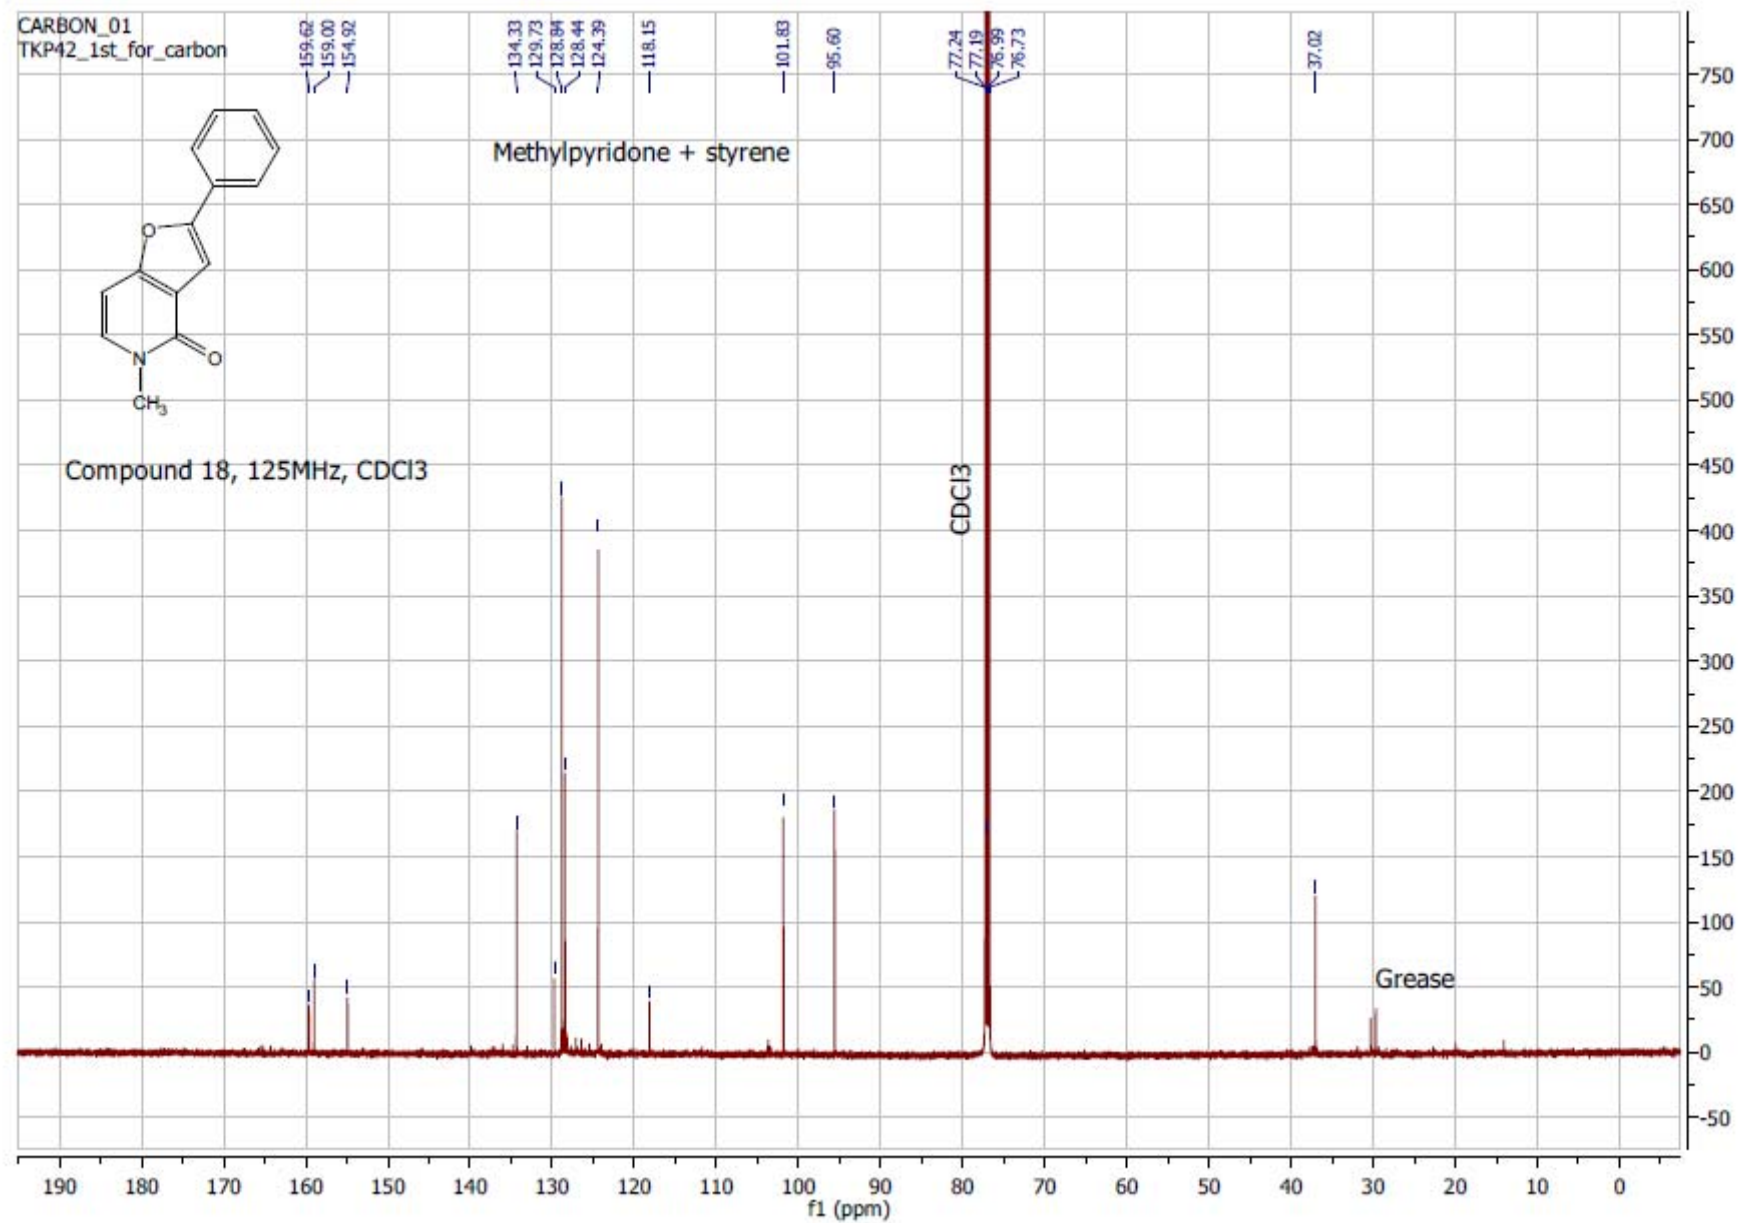

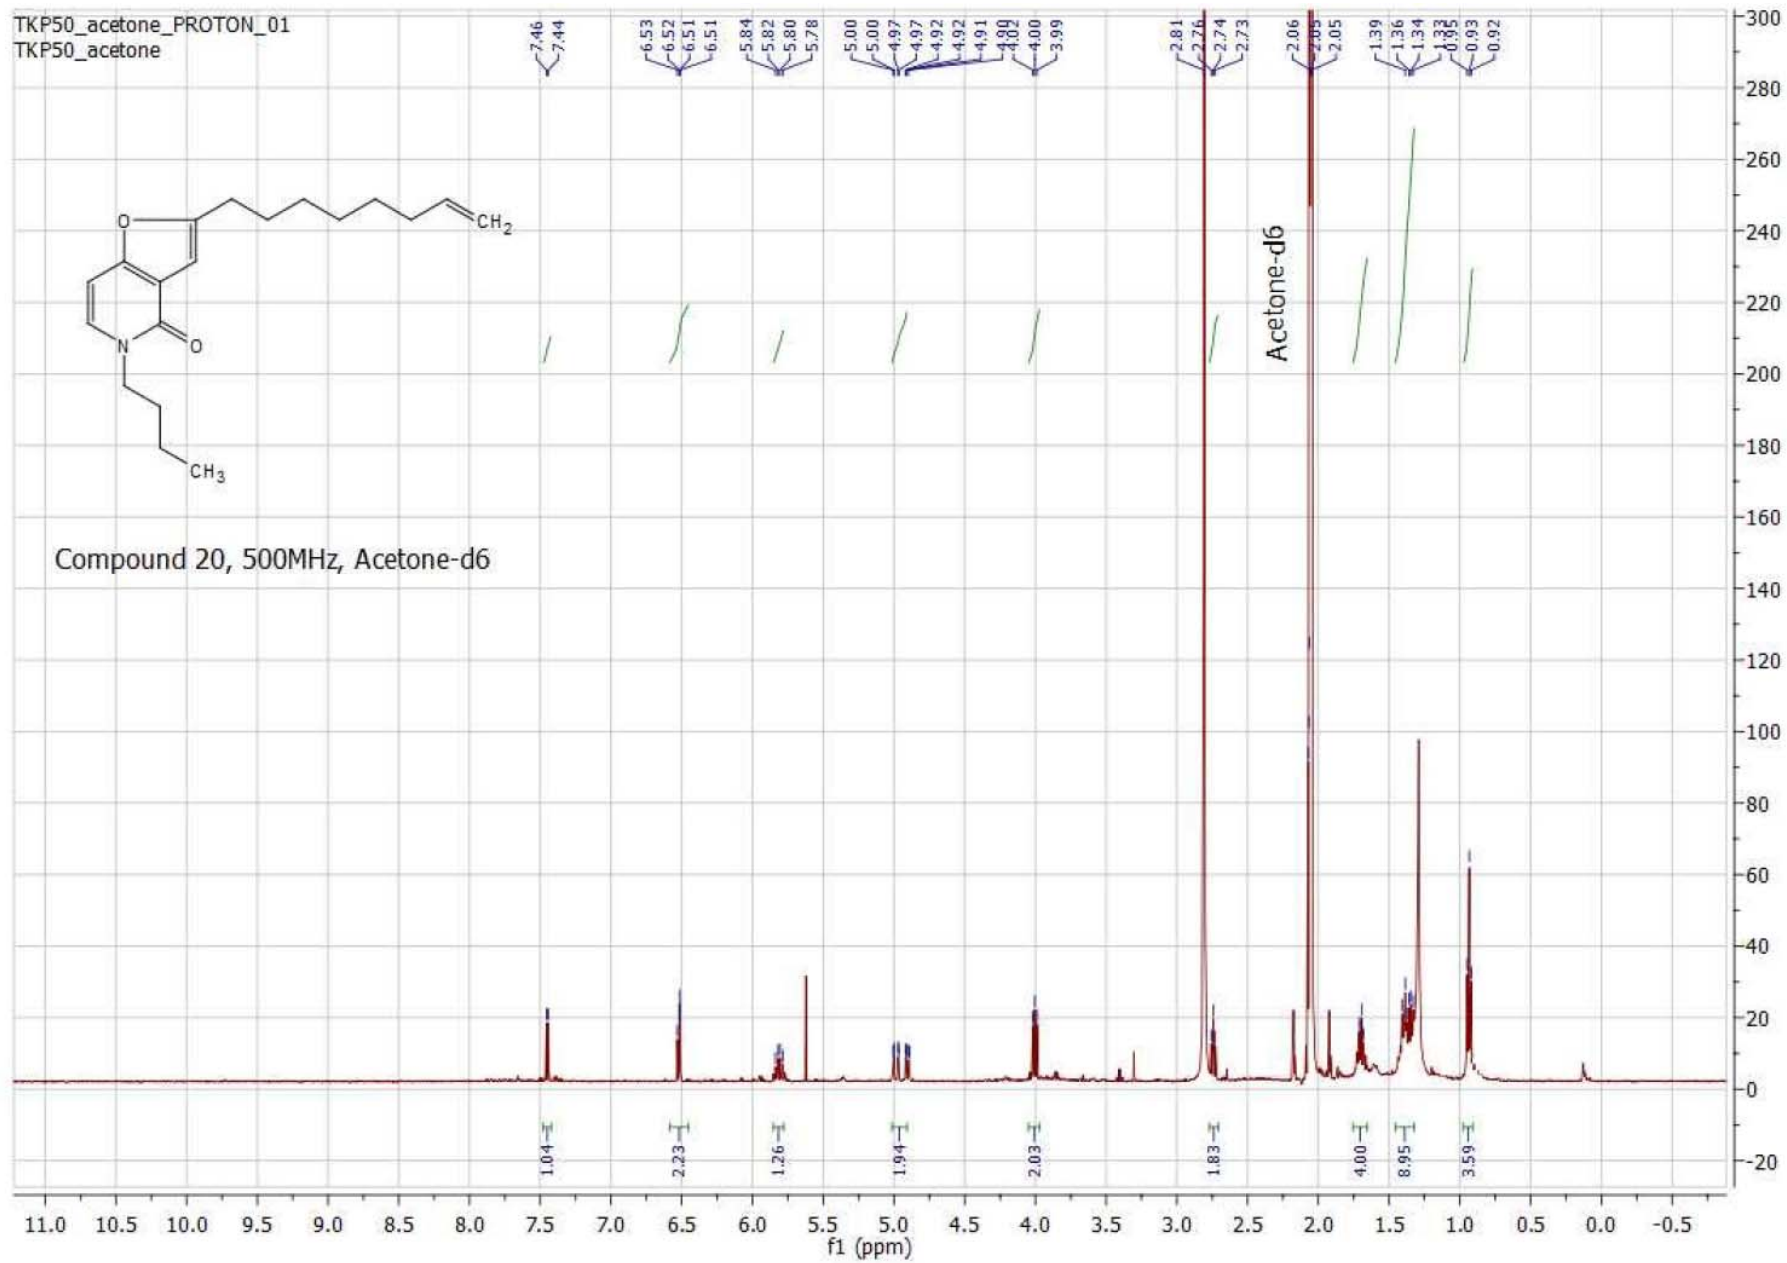

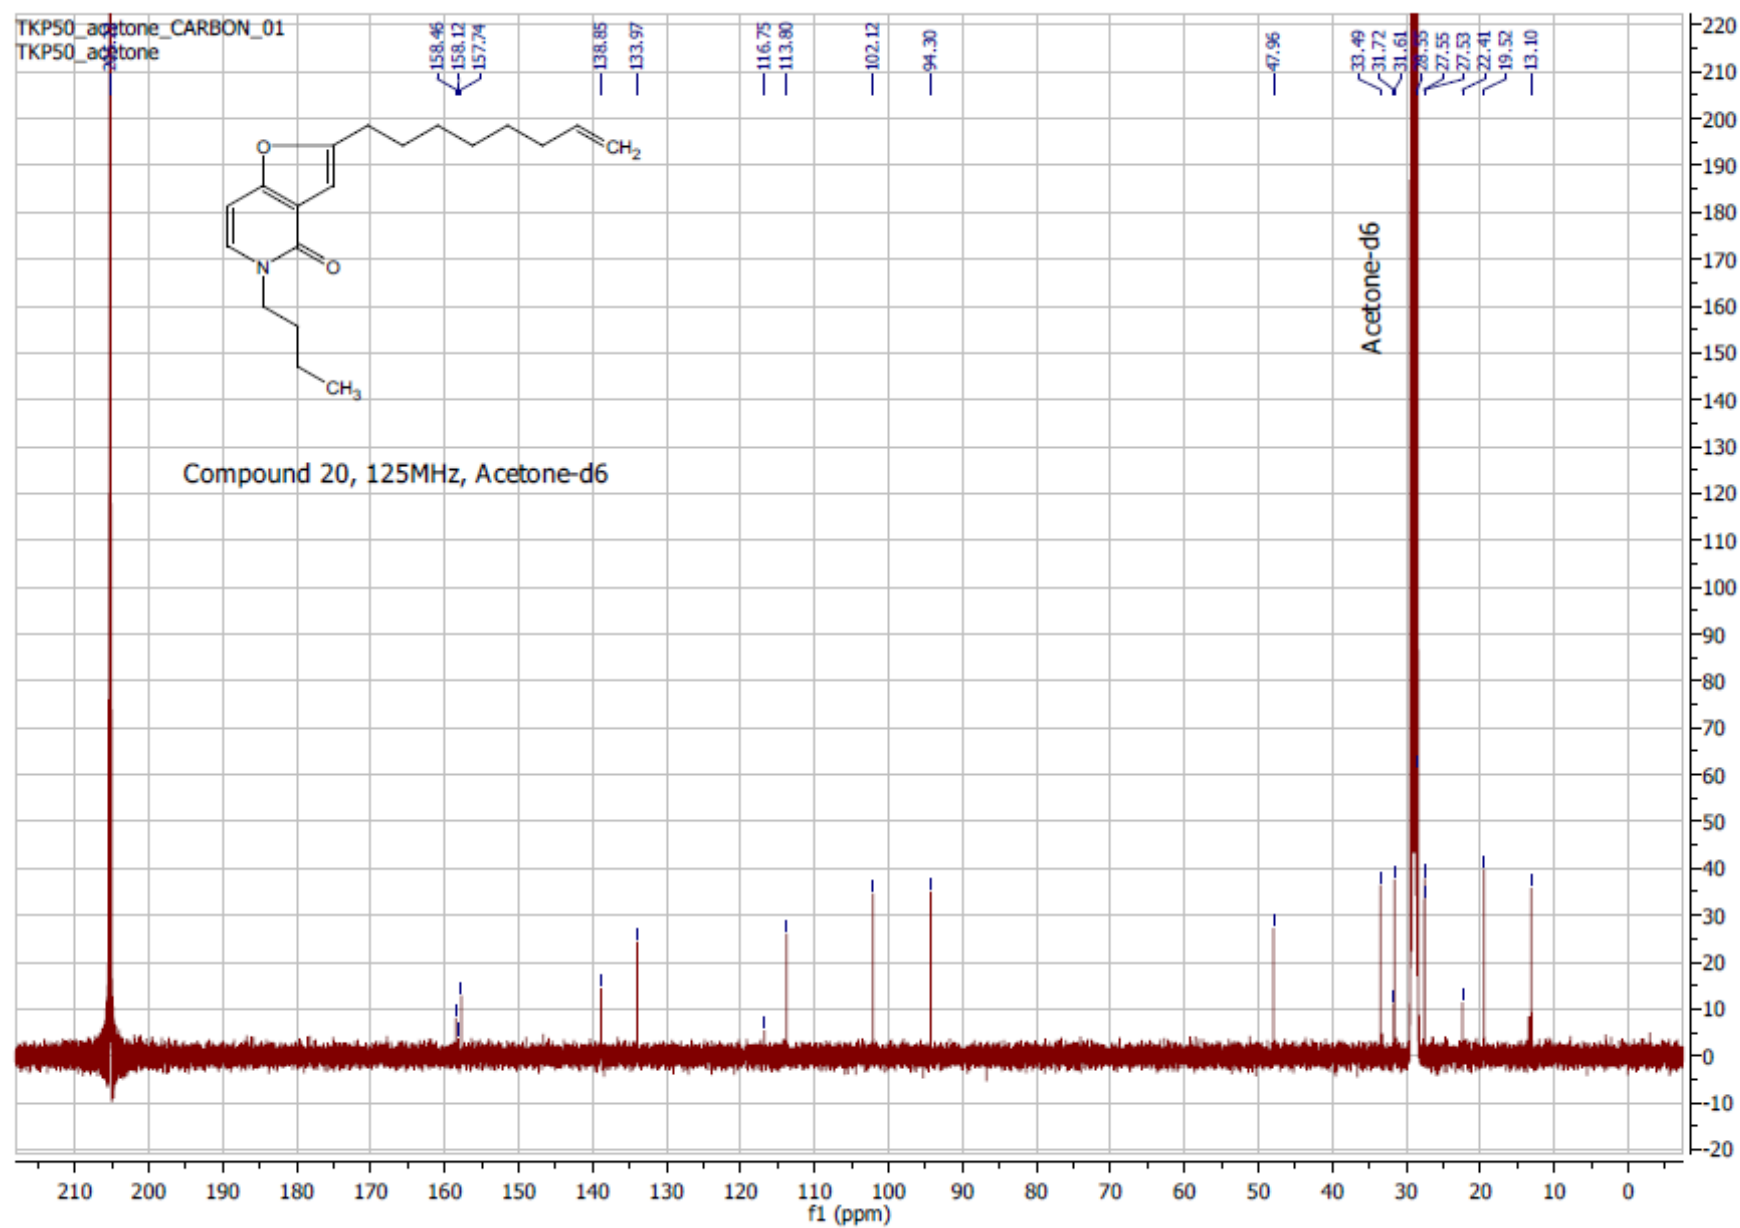

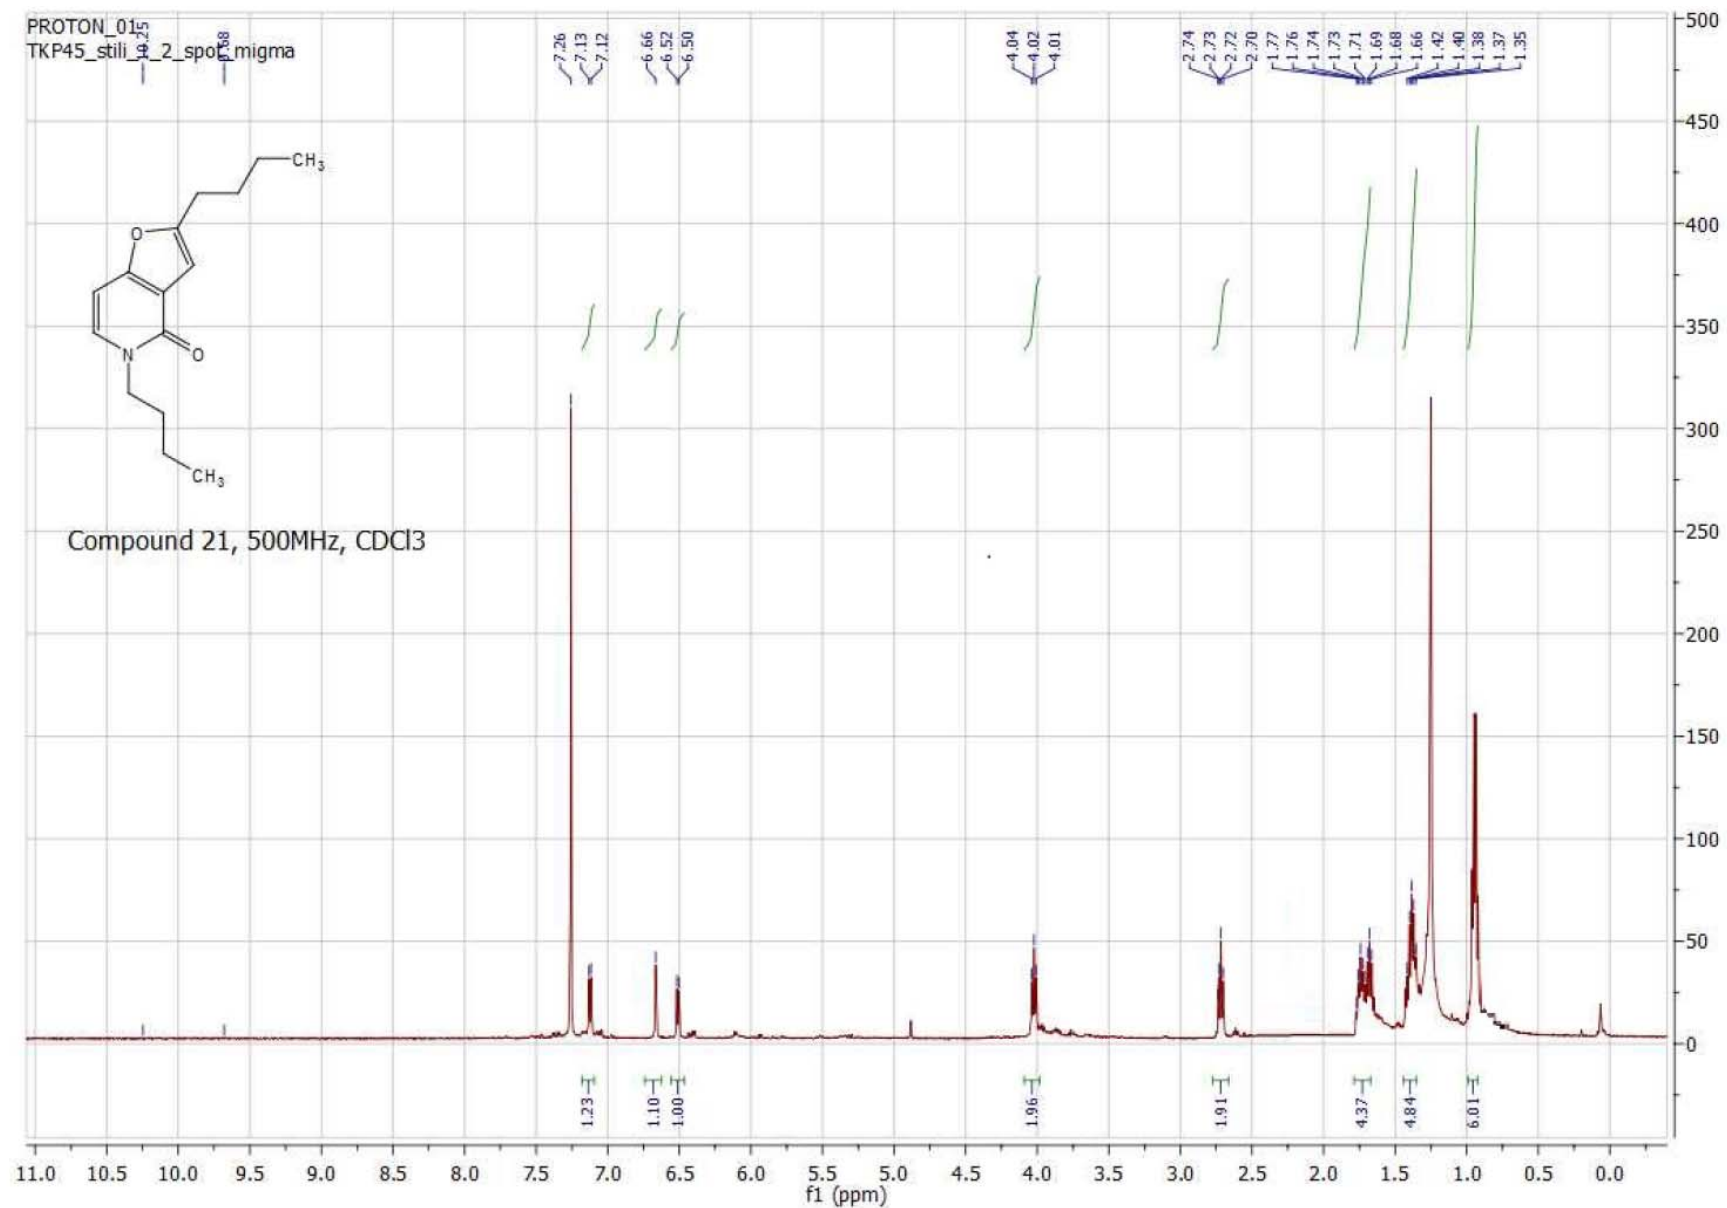



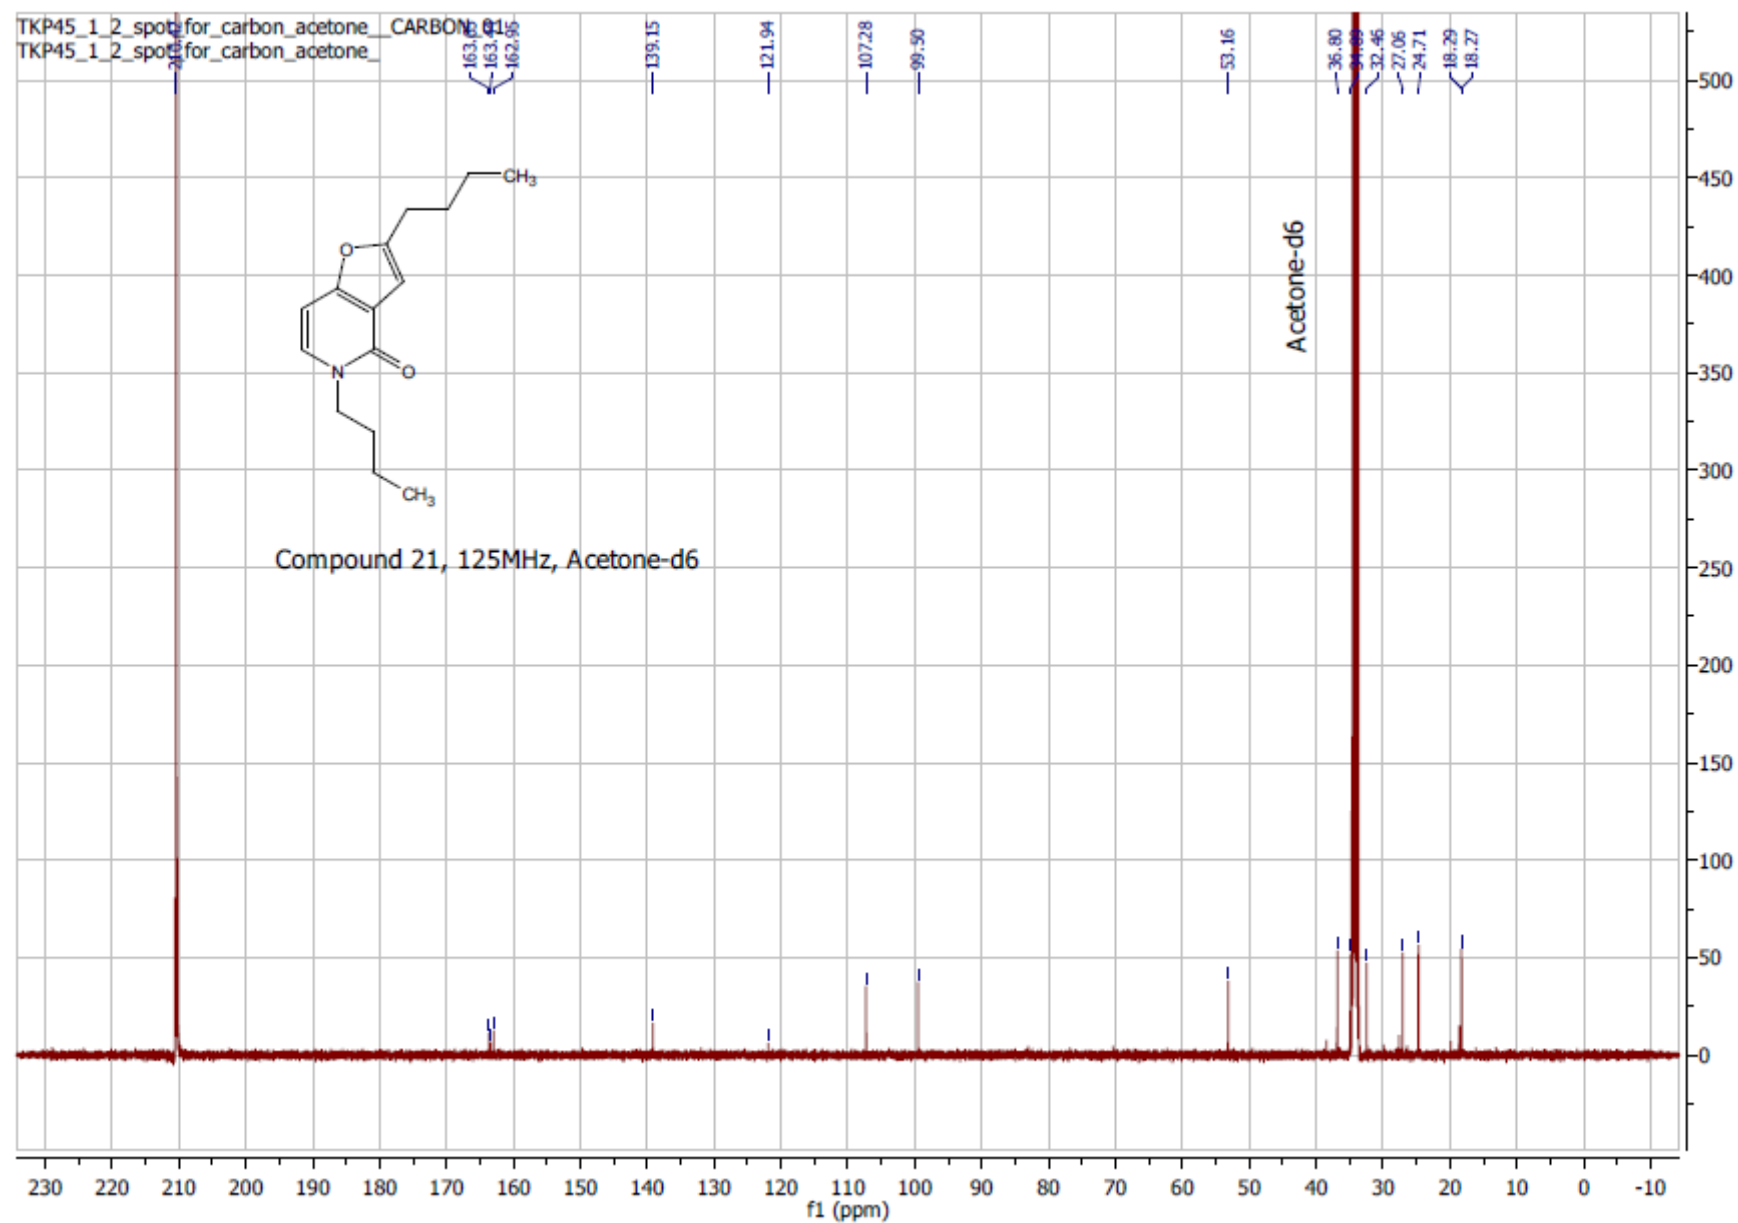

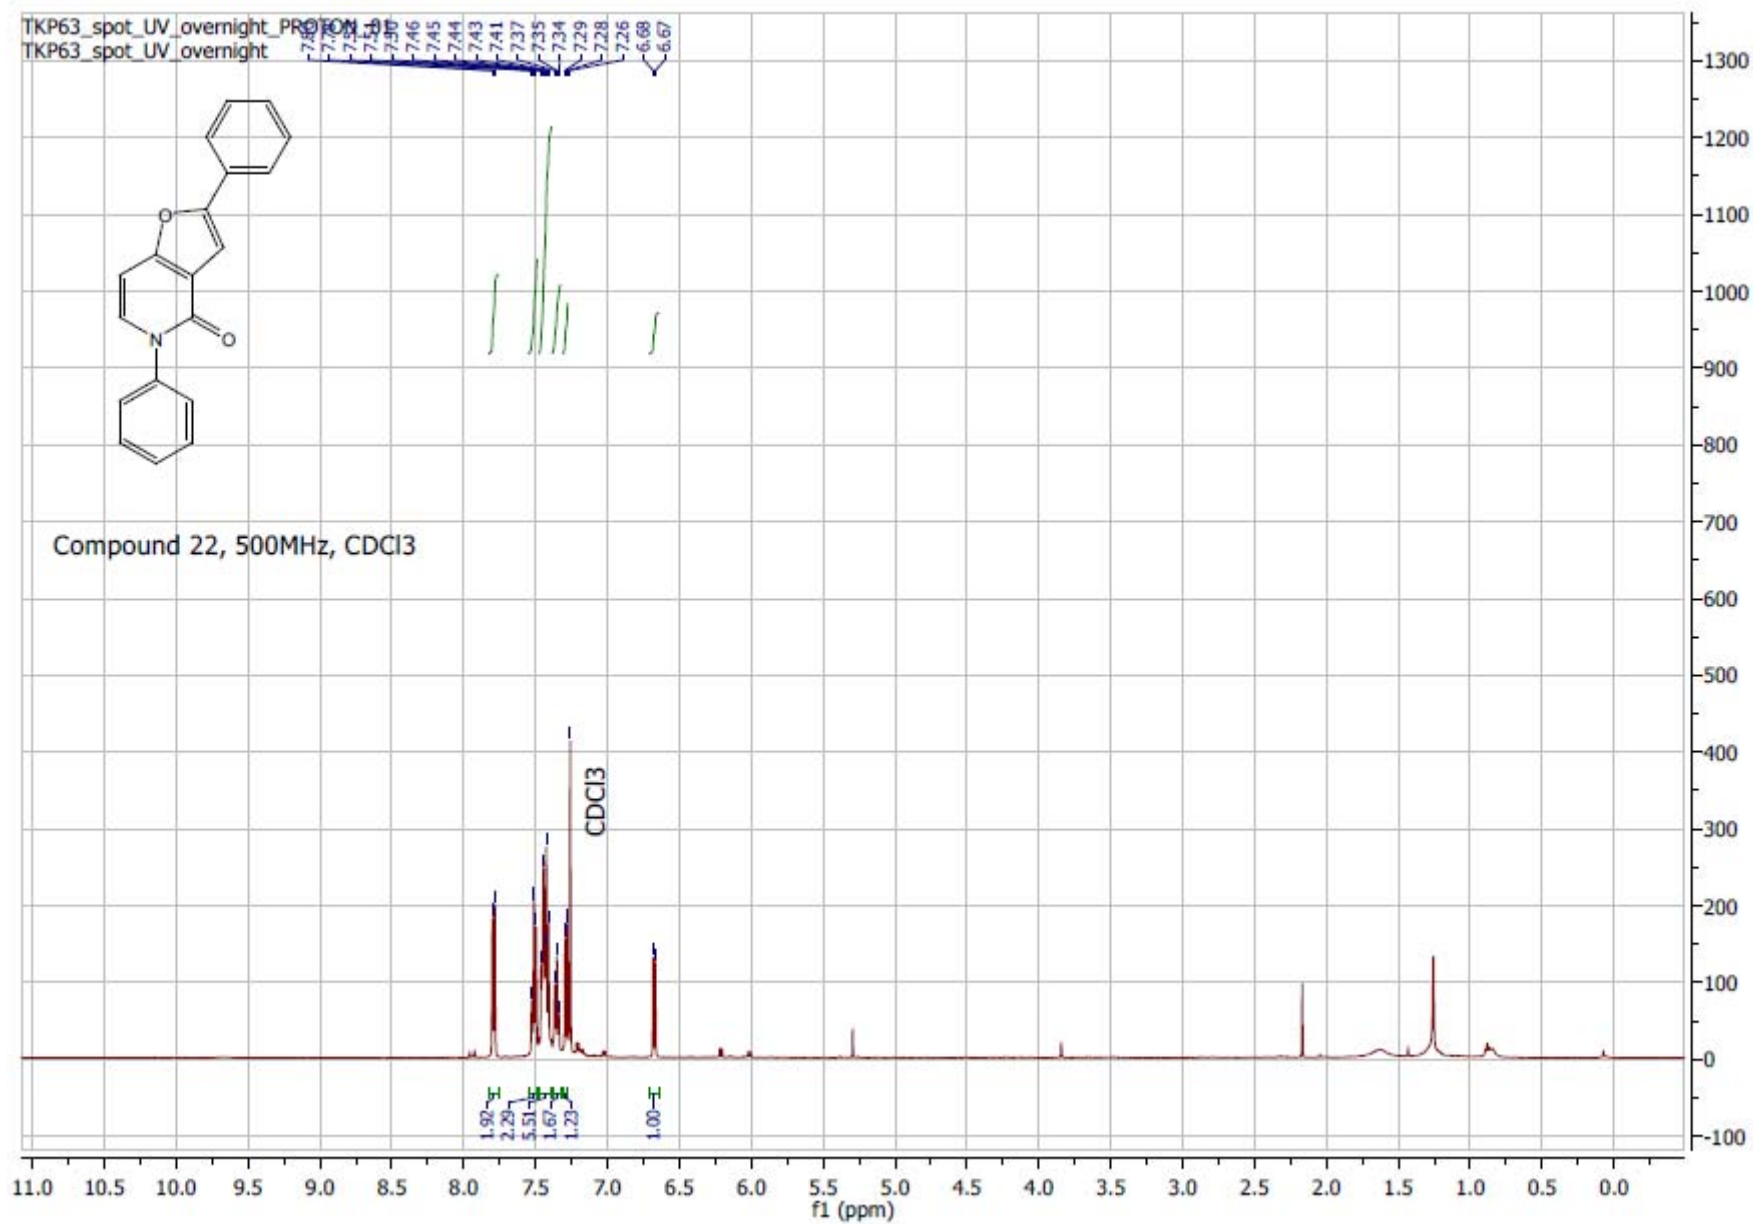

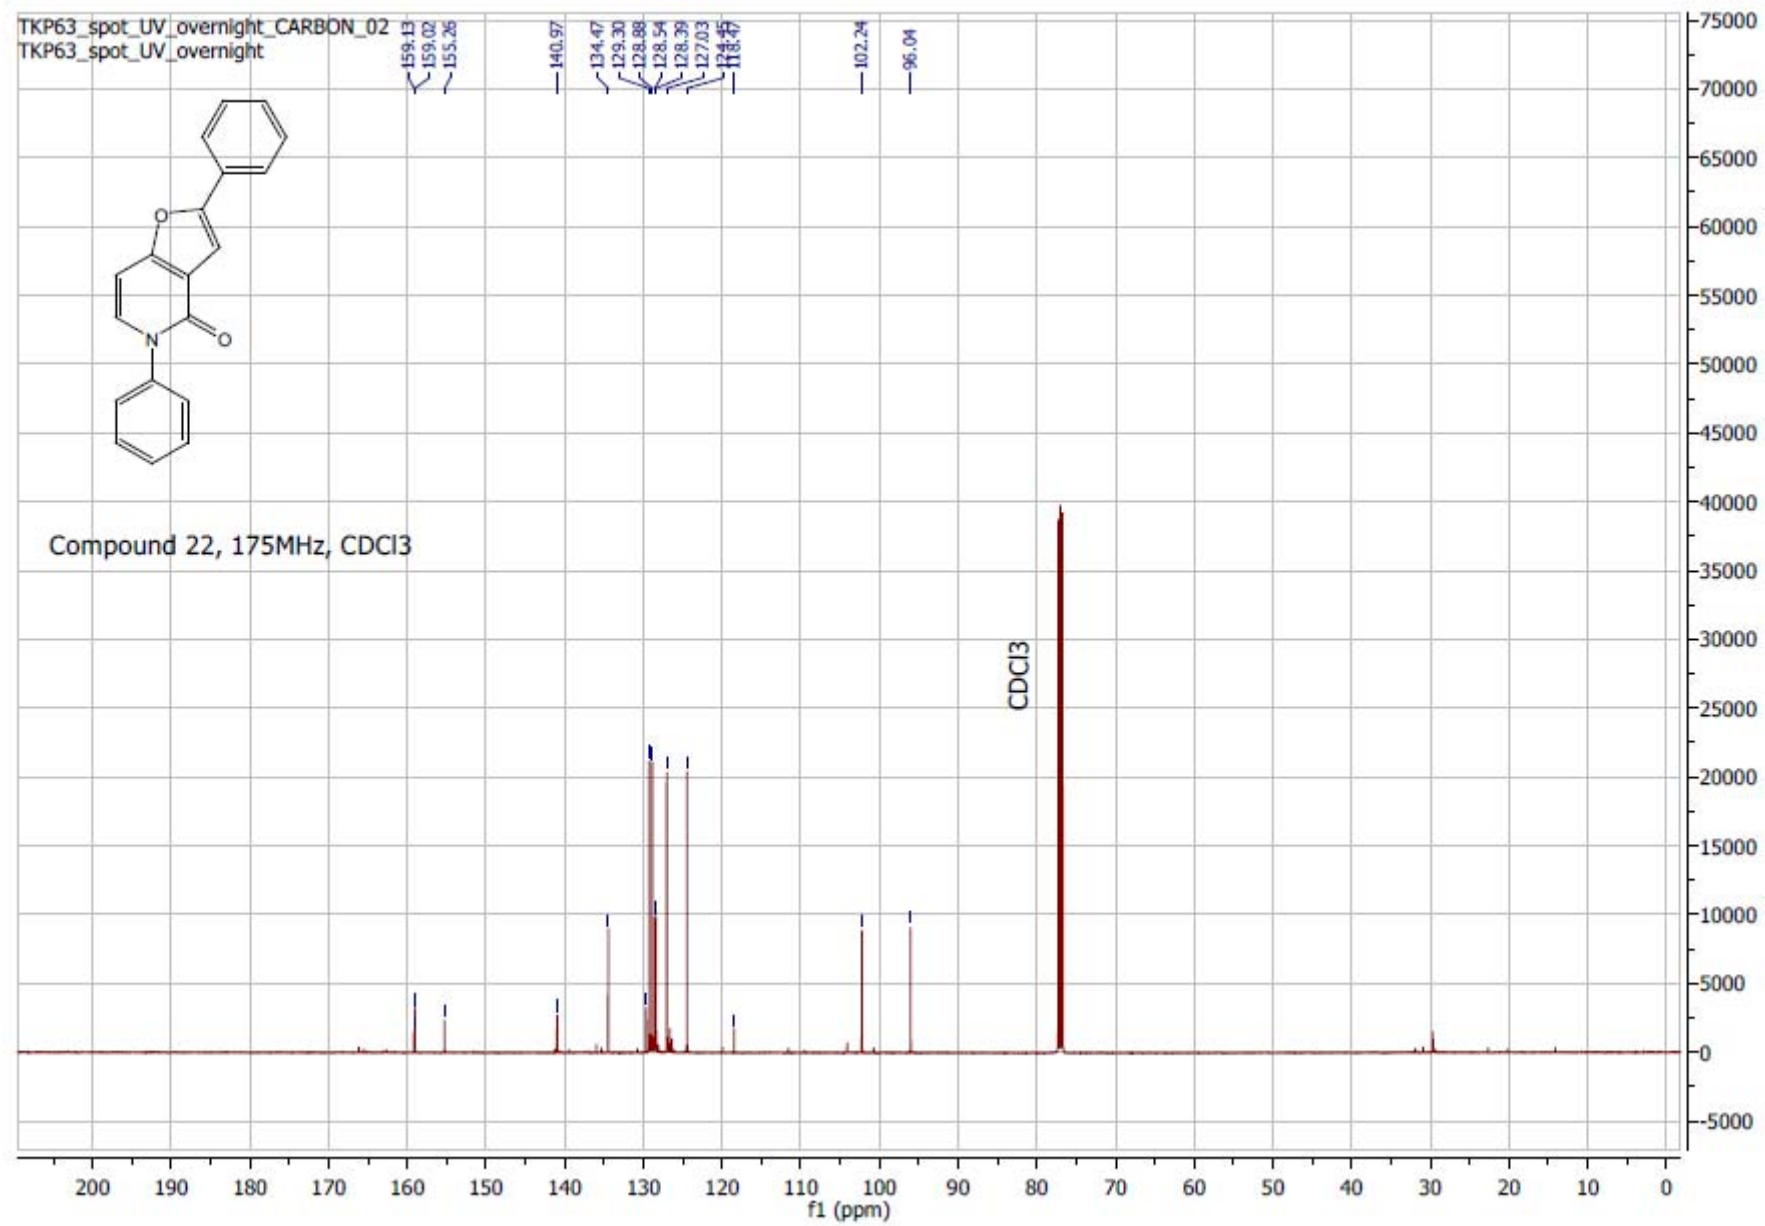

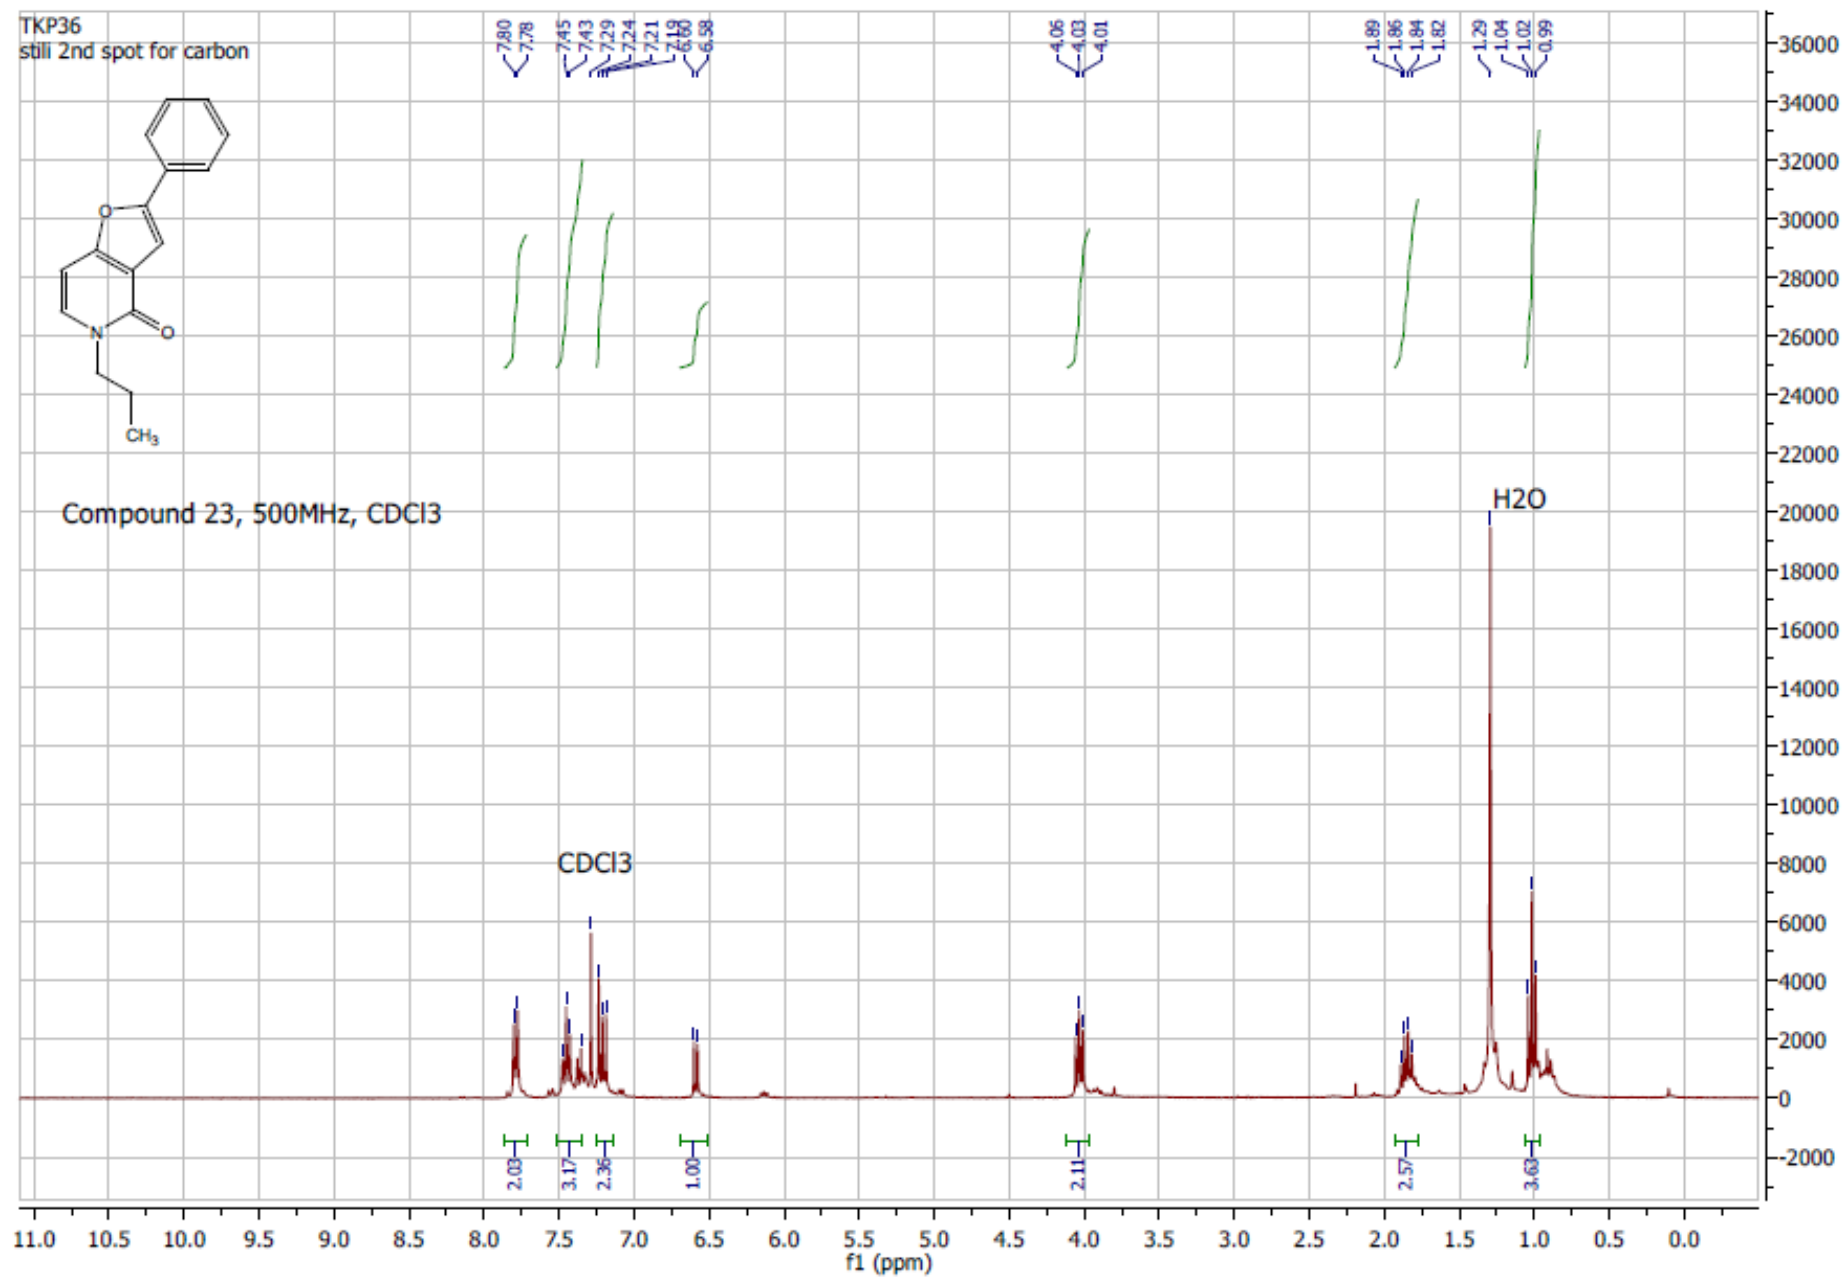

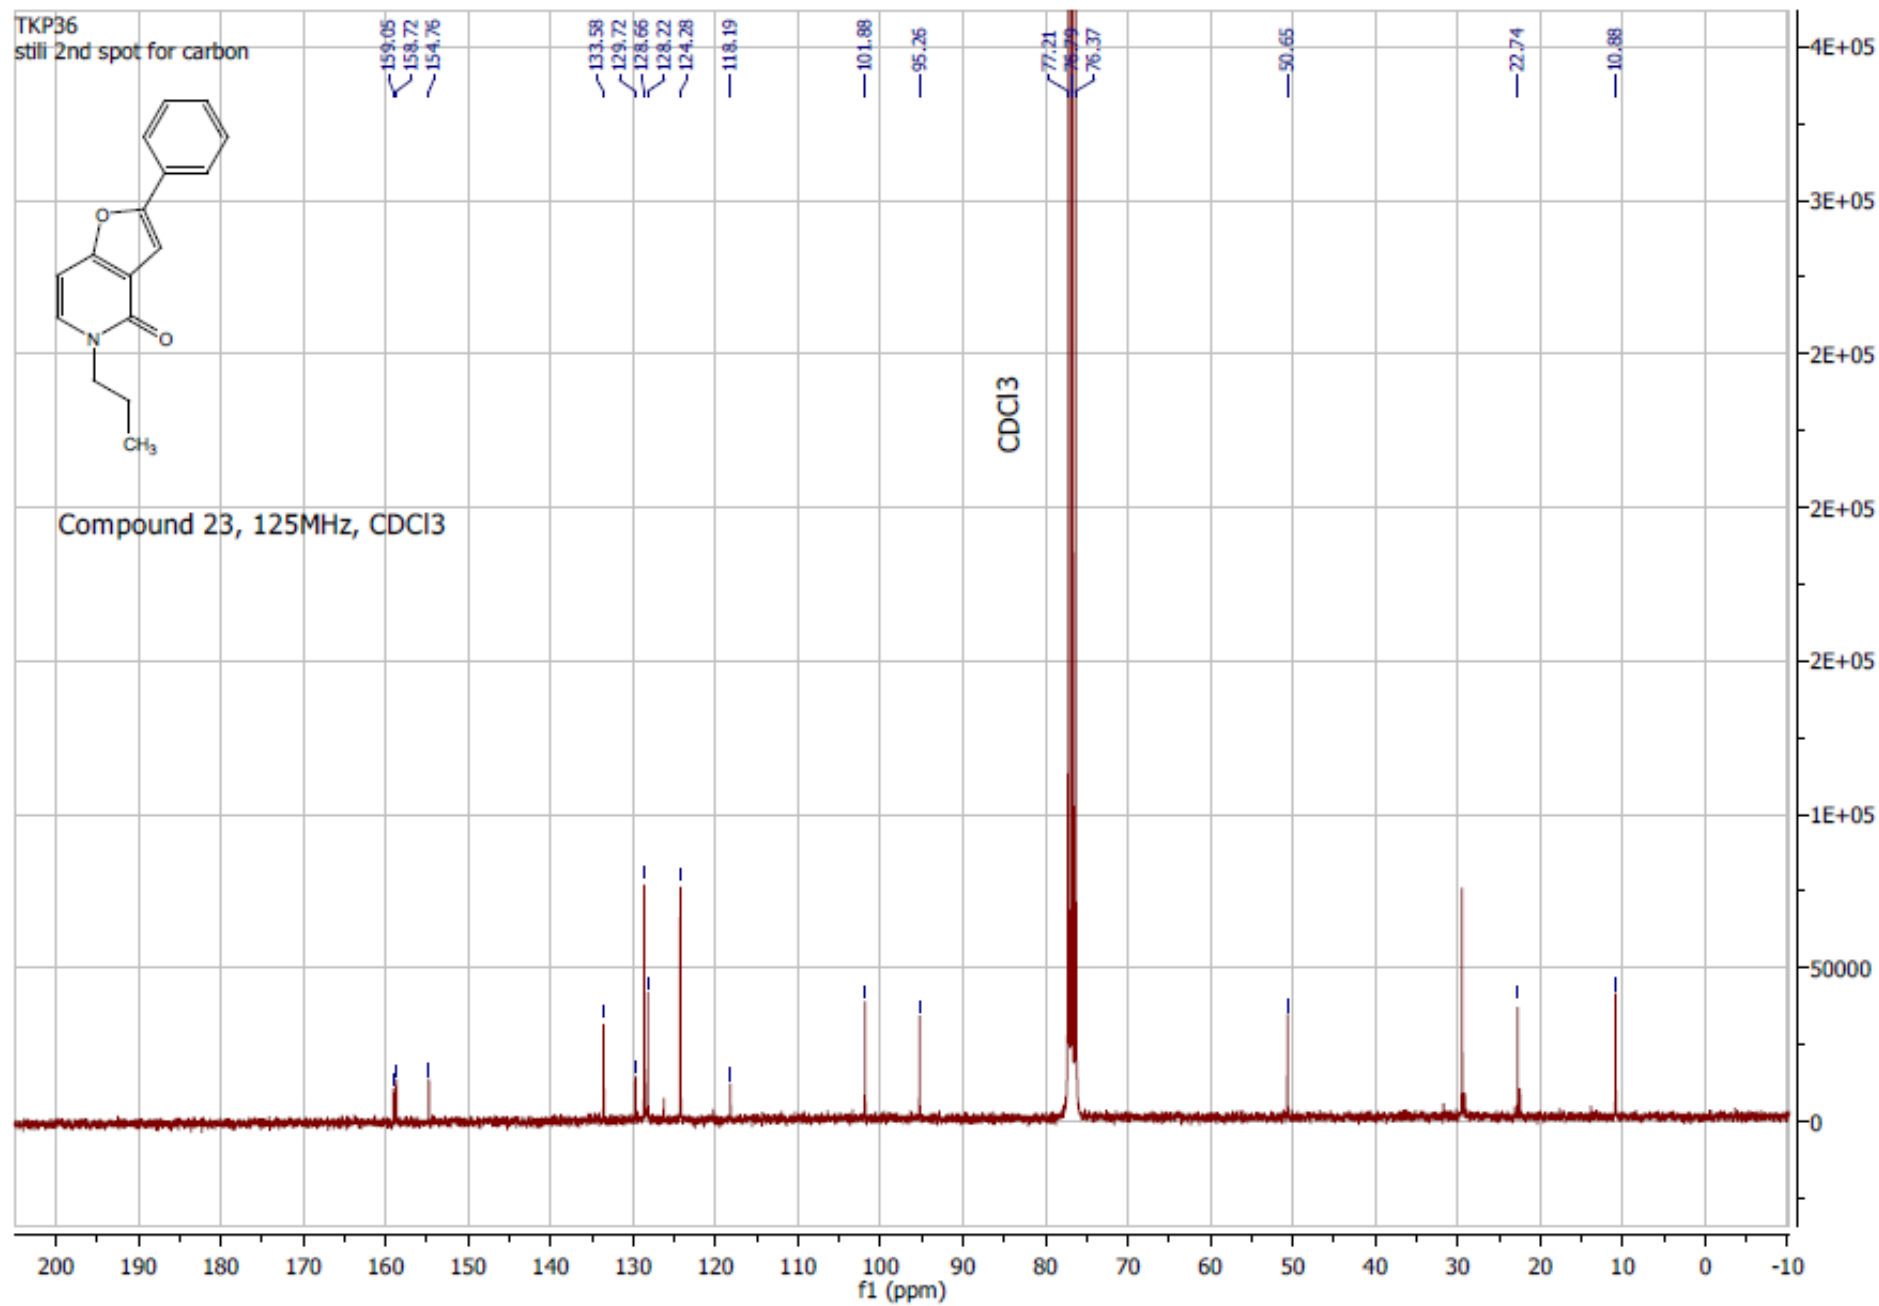

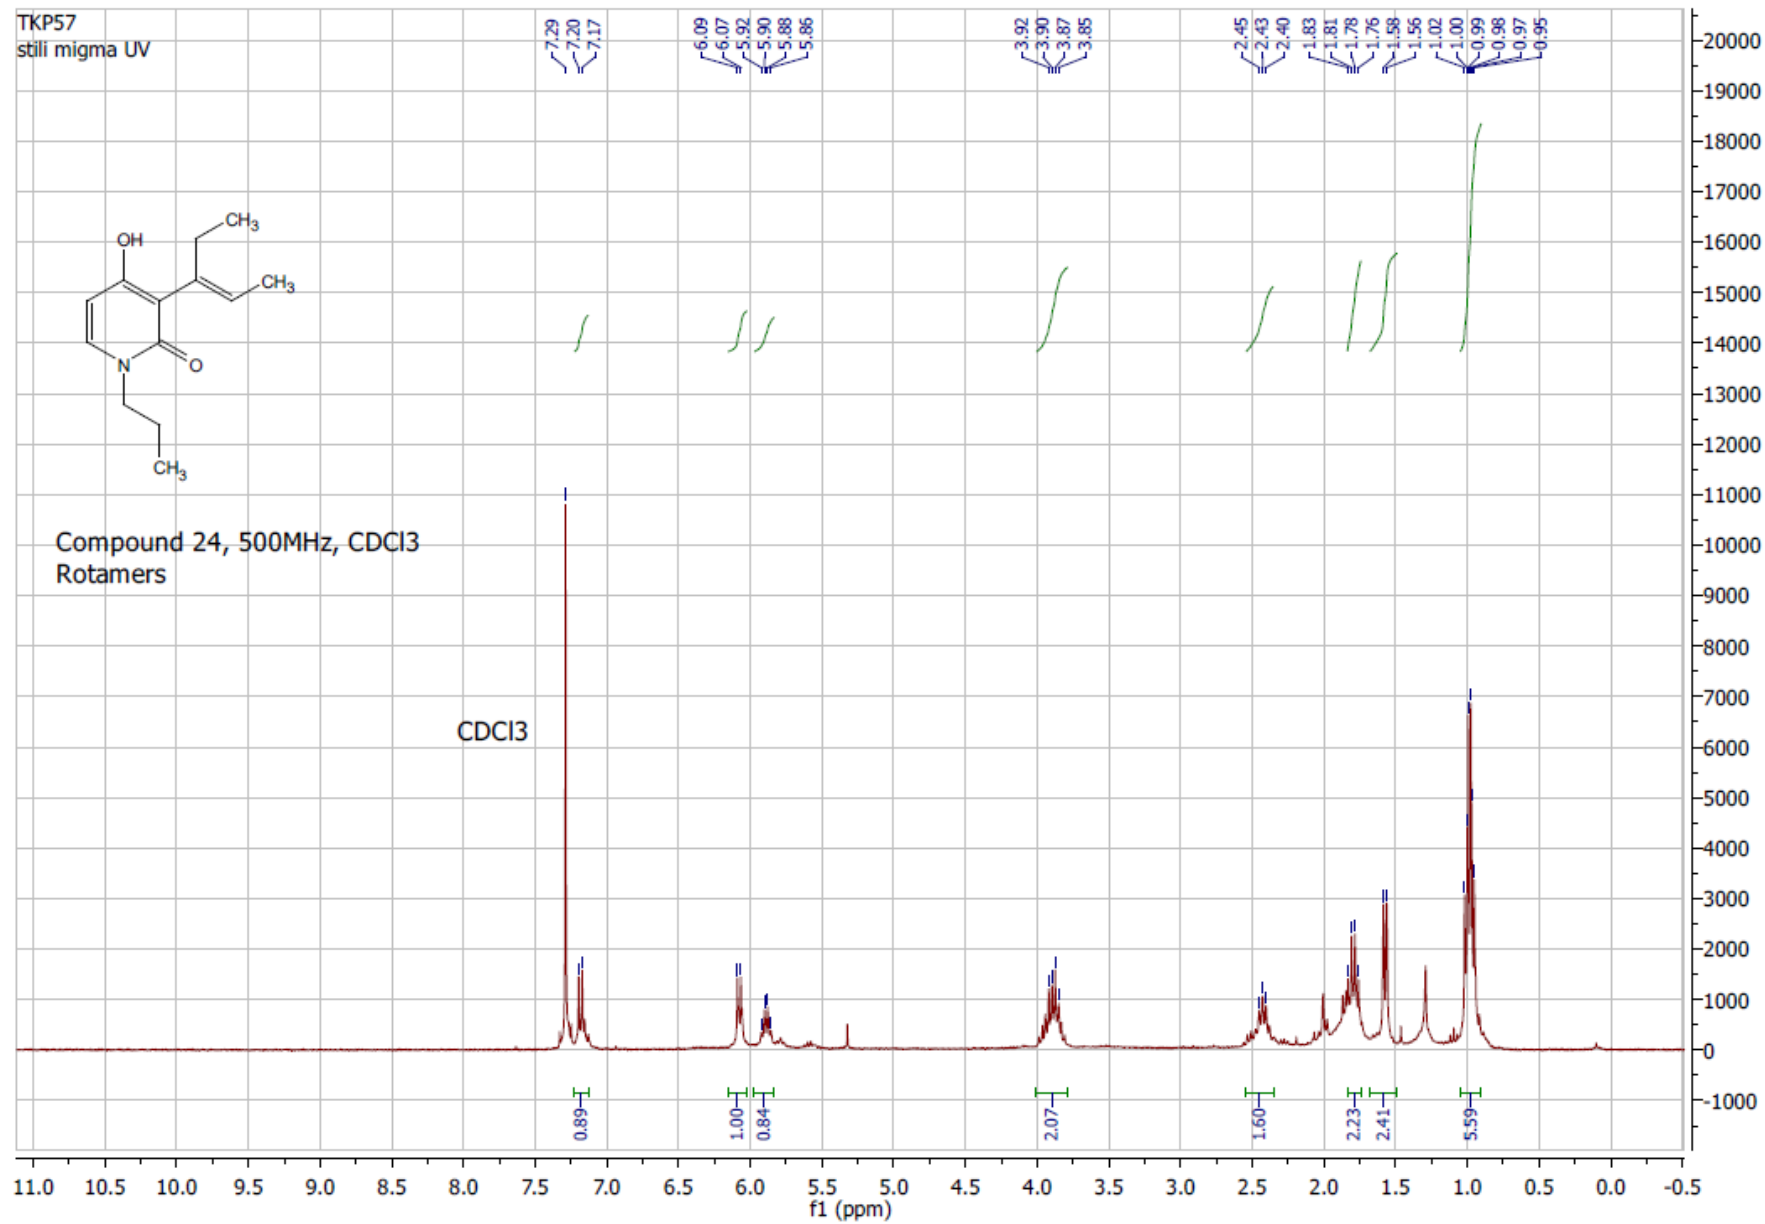

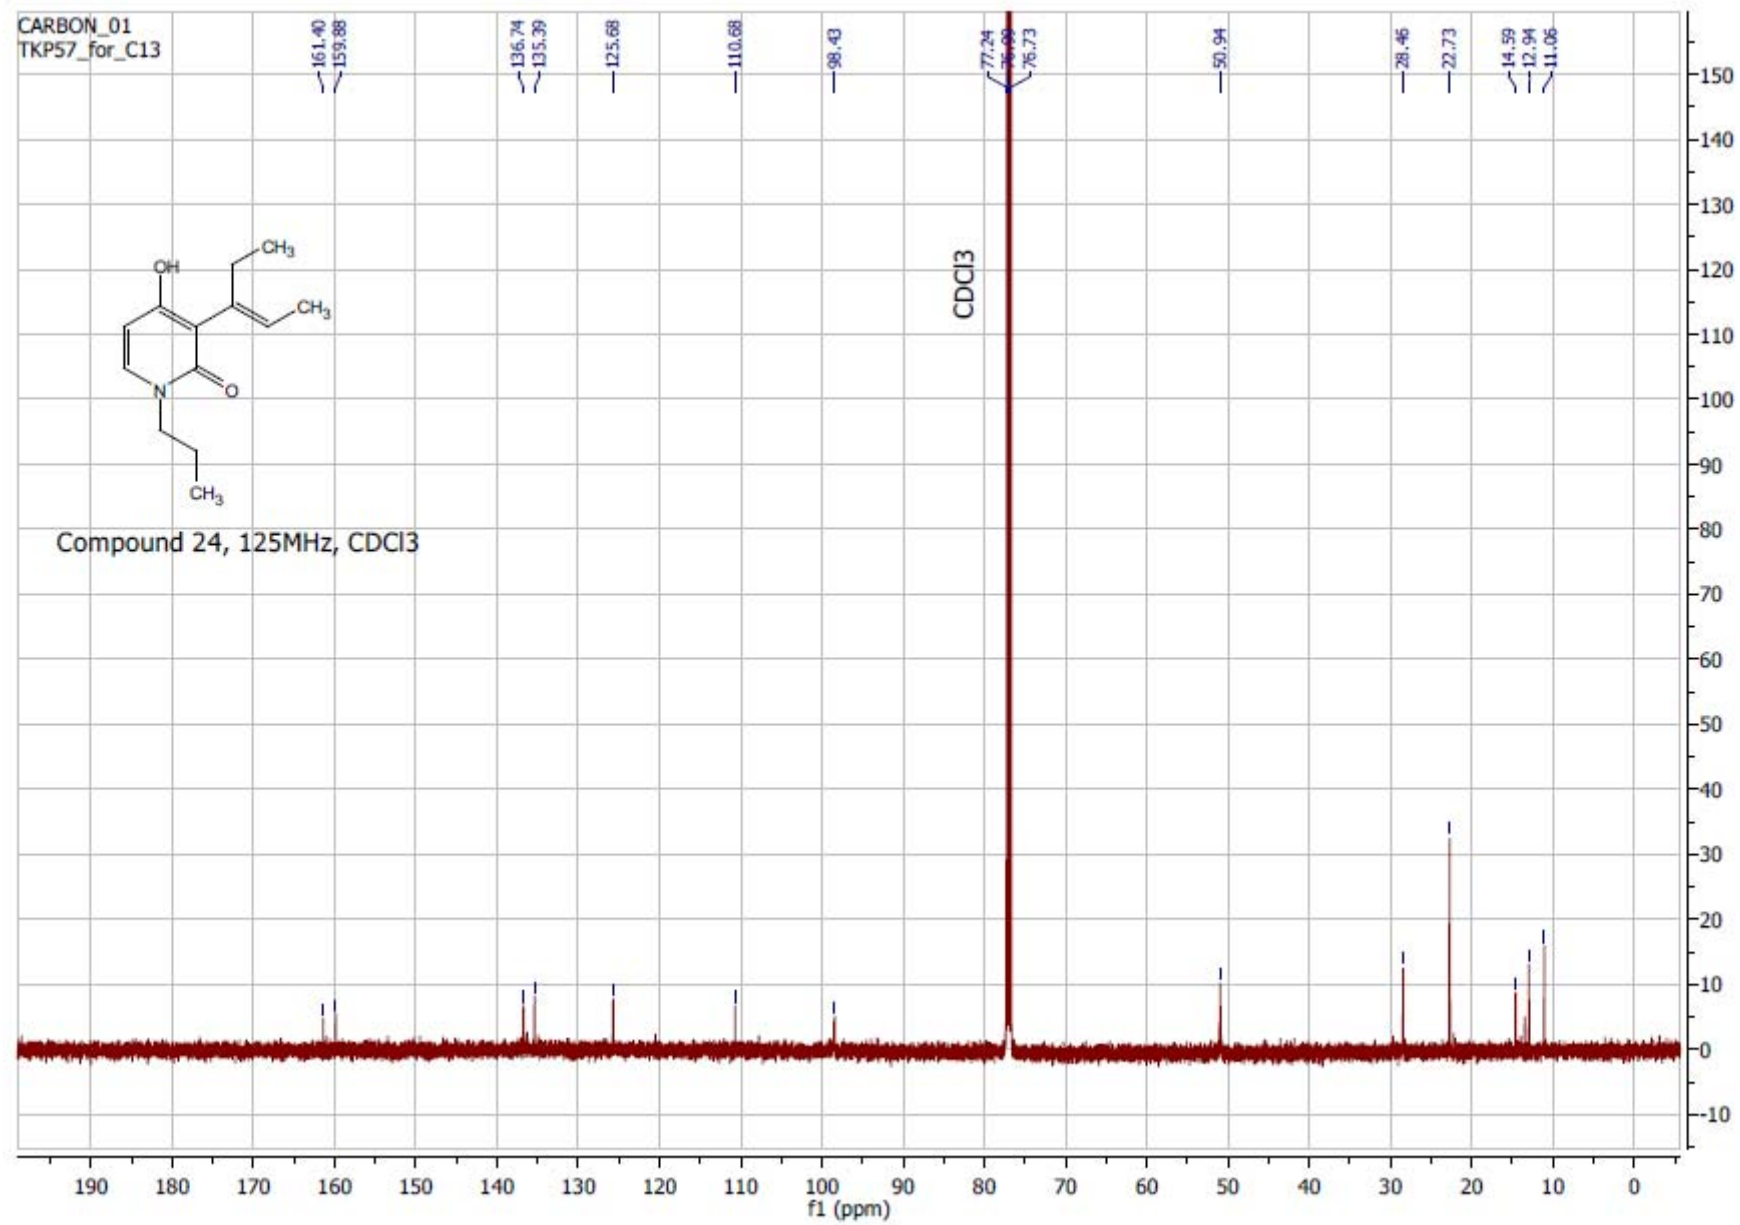

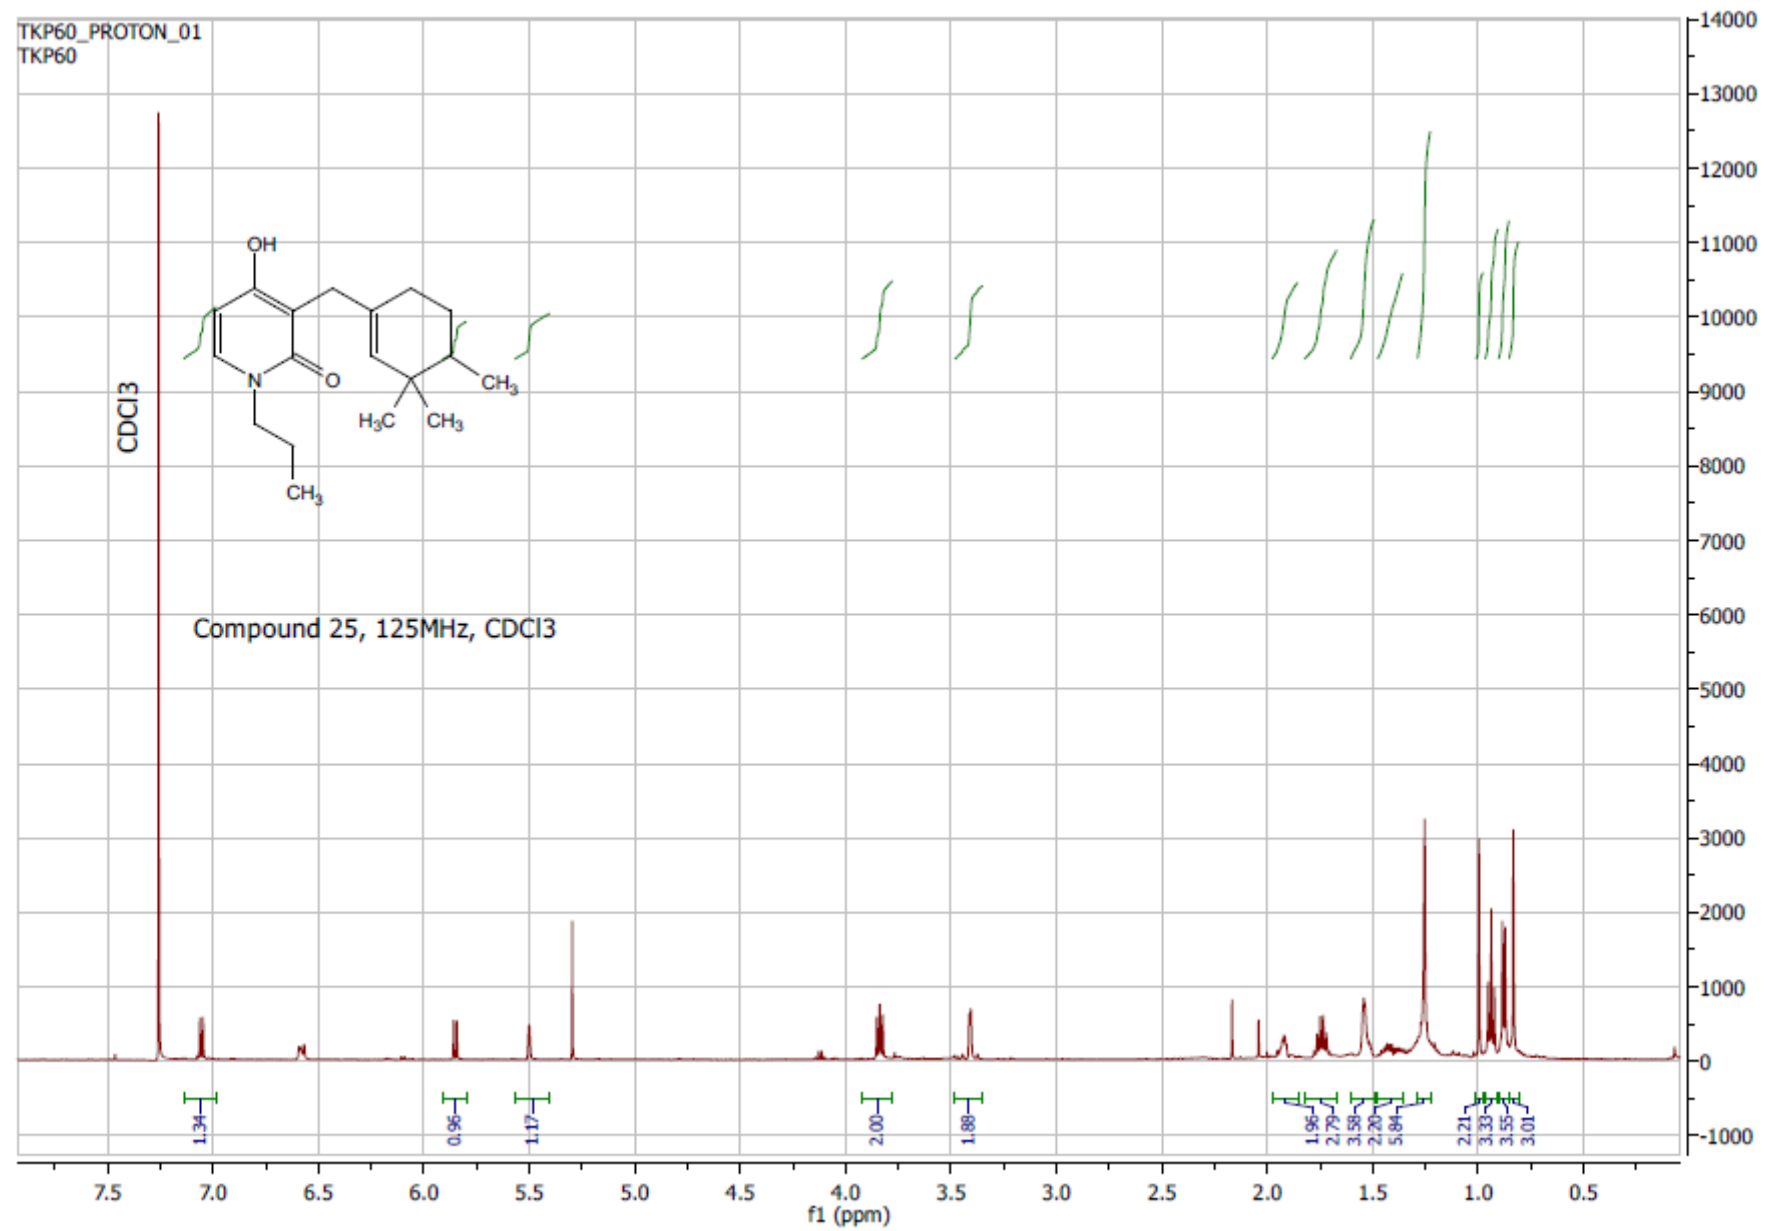



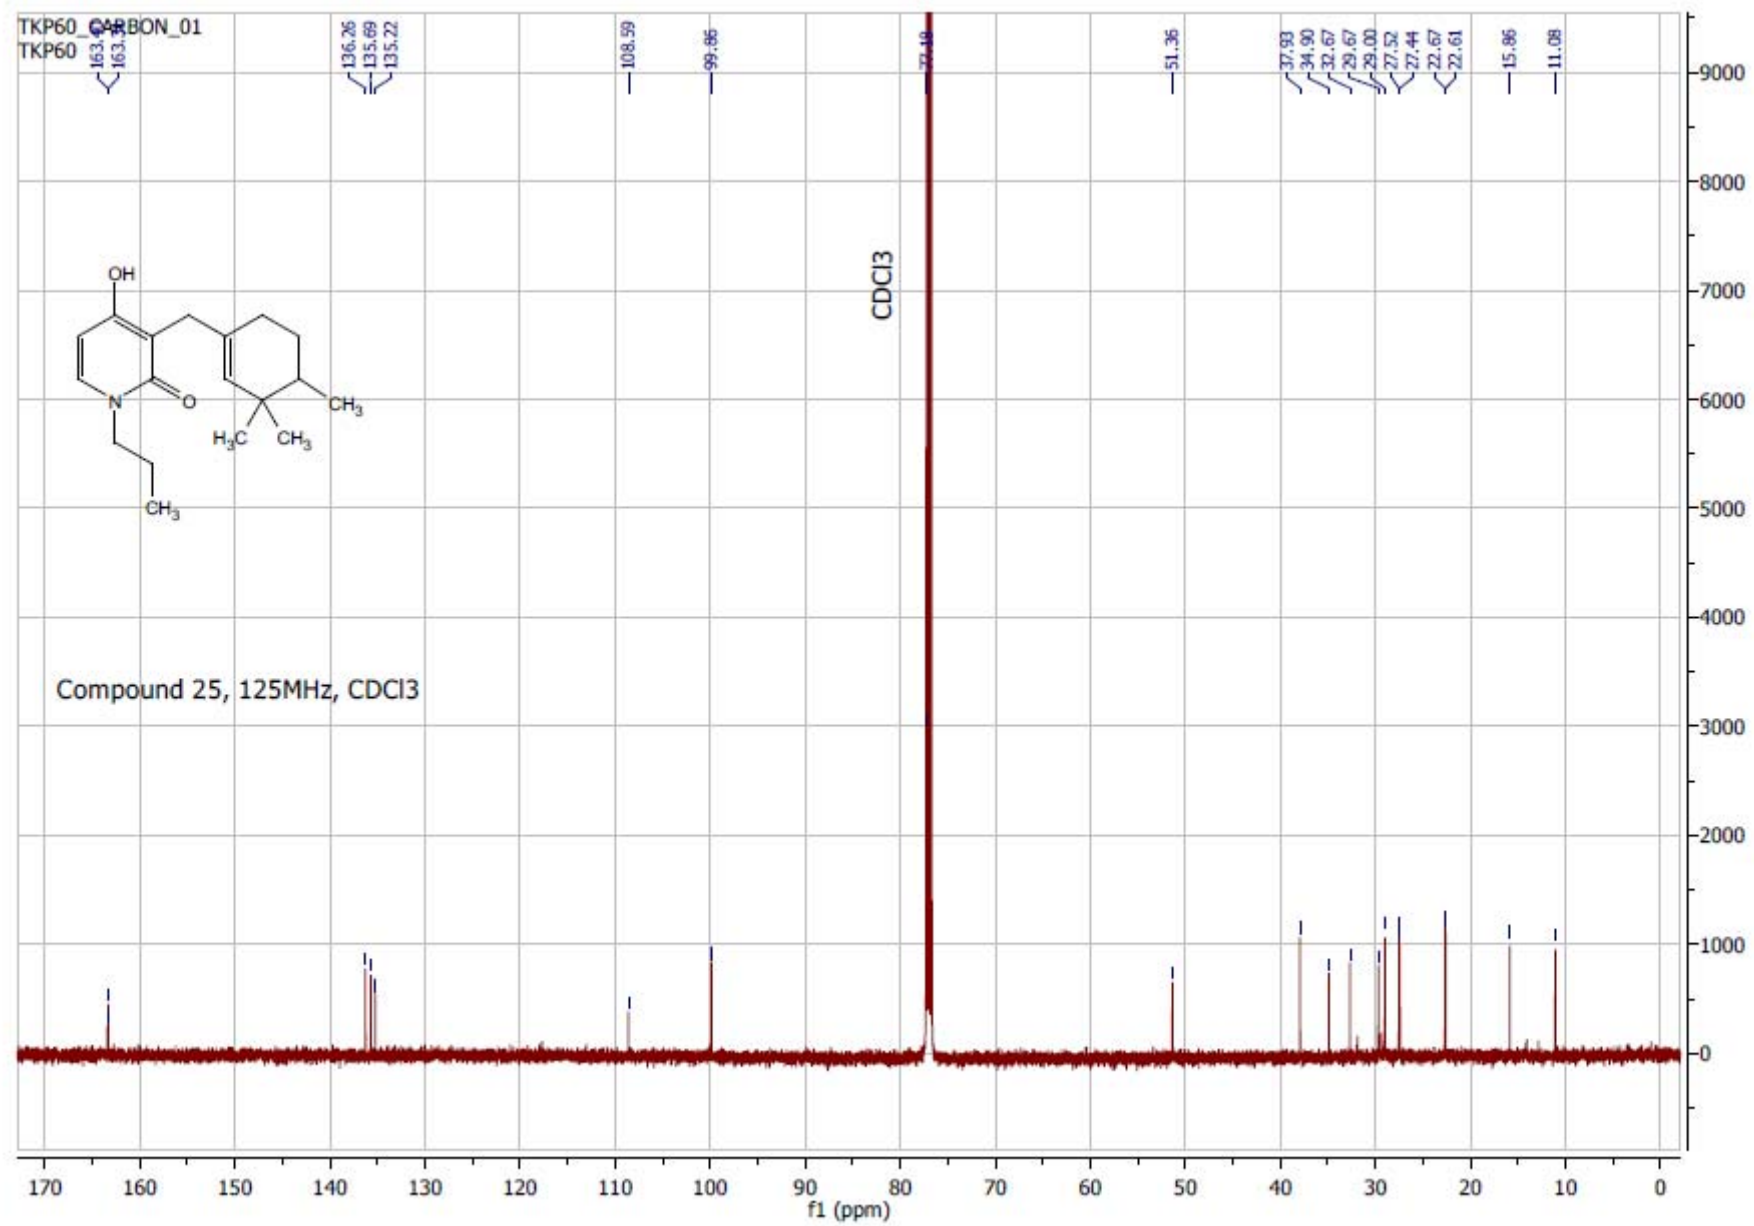

Supplement: c5ra26360c1.pdf [file c5ra26360c1.pdf]
